# Supplementary material for: Evolutionary history of human disease genes reveals phenotypic connections and comorbidity among genetic diseases
Source: PubMed Central journal article supplement — Sci Rep. 2012 Oct 22;2:757. doi: 10.1038/srep00757 (PMC3477654; doi:10.1038/srep00757), 2012-10-22
Supplement: srep00757-s1.pdf [file srep00757-s1.pdf]

Supplementary information

**Evolutionary history of human disease genes reveals phenotypic connections and comorbidity among genetic diseases**

Solip Park<sup>1</sup>, Jae-Seong Yang<sup>1</sup>, Jinho Kim<sup>2</sup>, Young-Eun Shin<sup>2</sup>, Jihye Hwang<sup>3,4</sup>, Juyong Park<sup>5</sup>, Sung Key Jang<sup>1,2,4</sup> and Sanguk Kim<sup>1,2,3,†</sup>

<sup>1</sup>School of Interdisciplinary Bioscience and Bioengineering, <sup>2</sup>Division of Molecular and Life science, <sup>3</sup>Division of IT Convergence Engineering, <sup>4</sup>Division of Integrative Bioscience and Biotechnology, Biotechnology Research Center, Pohang University of Science and Technology, Pohang, Korea, <sup>5</sup>Physics Department, Kyung Hee University, Seoul, Korea

## Supplementary Figure

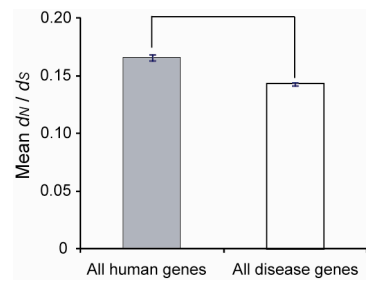

**Supplementary Figure 1:** Average evolutionary rate ( $d_N/d_S$ ) of human disease genes compared with all human genes ( $P = 0.003$ ; Mann-Whitney  $U$  test).

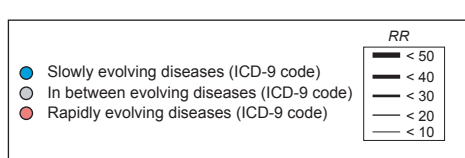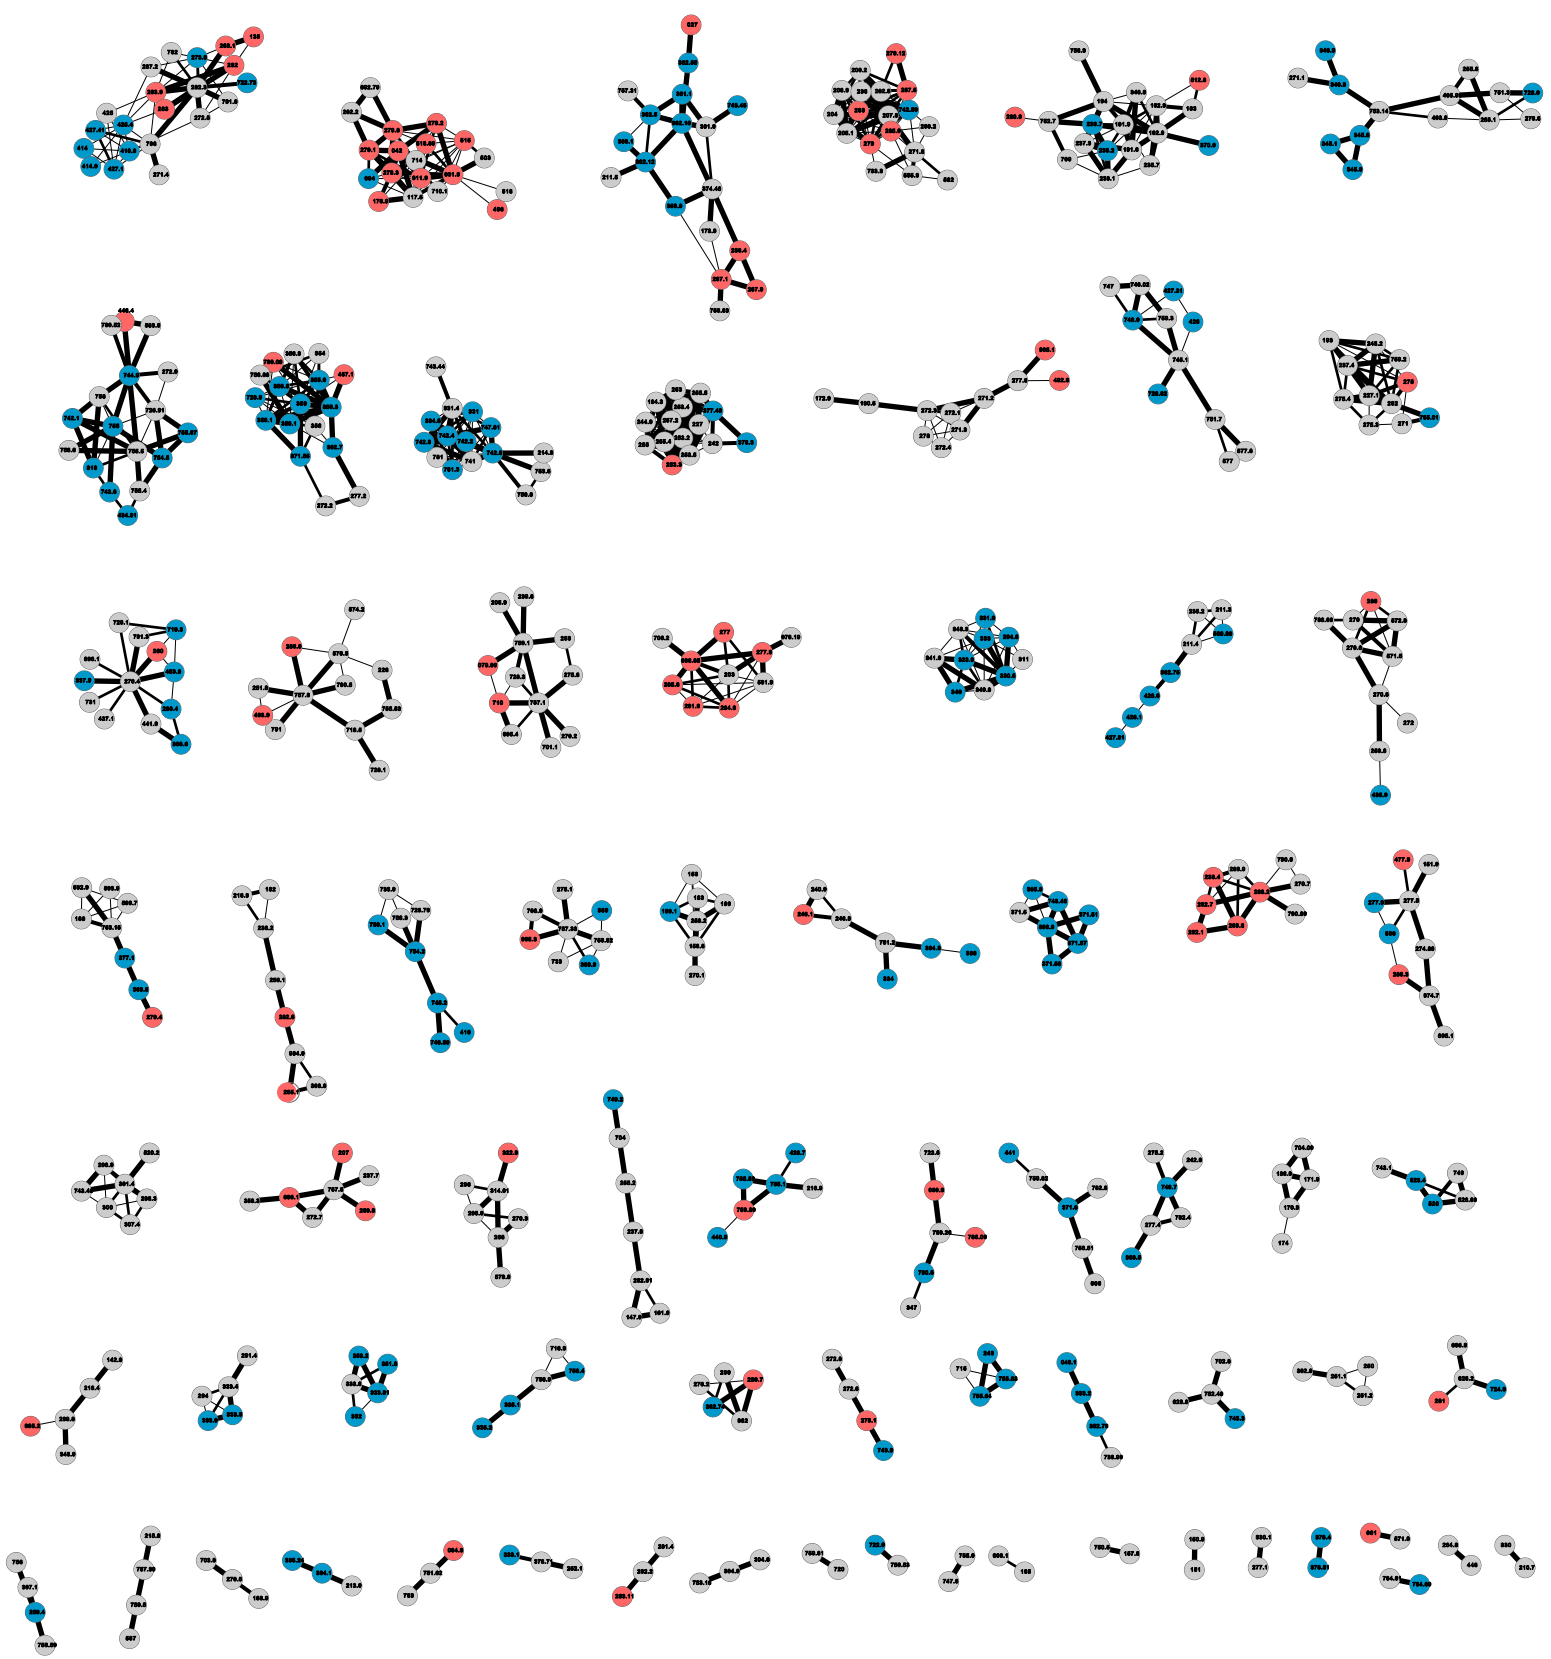

**Supplementary Figure 2: Disease modules of the phenotypic disease network clustered by the MCL method.** Nodes are diseases (blue: slow evolving disease; red: rapidly evolving disease) and edge strengths are comorbidity tendencies.

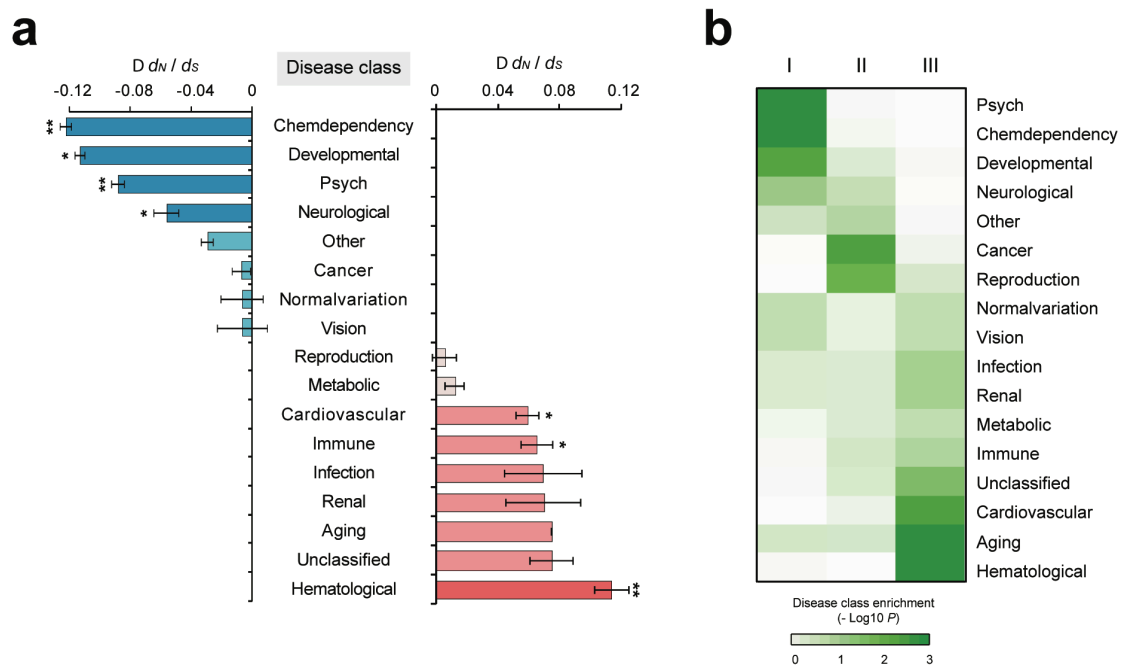

**Supplementary Figure 3: Evolutionary rates of human complex disease genes across the disease class.** (a) Evolution rate of human complex disease genes classified based on their phenotypic grouping.  $\Delta d_N/d_S$  values indicate the difference in average evolutionary rate ( $d_N/d_S$ ) between all human disease-associated genes and each disease class-associated gene ( $*P < 0.01$ ,  $**P < 0.001$ ; Mann-Whitney  $U$  test). (b) Enrichment of complex disease genes within each group quantified by the hypergeometric distribution. The disease groups were divided by similar numbers of disease genes. The intensity of green color indicates the significance of enrichment (hypergeometric  $P$ -values).

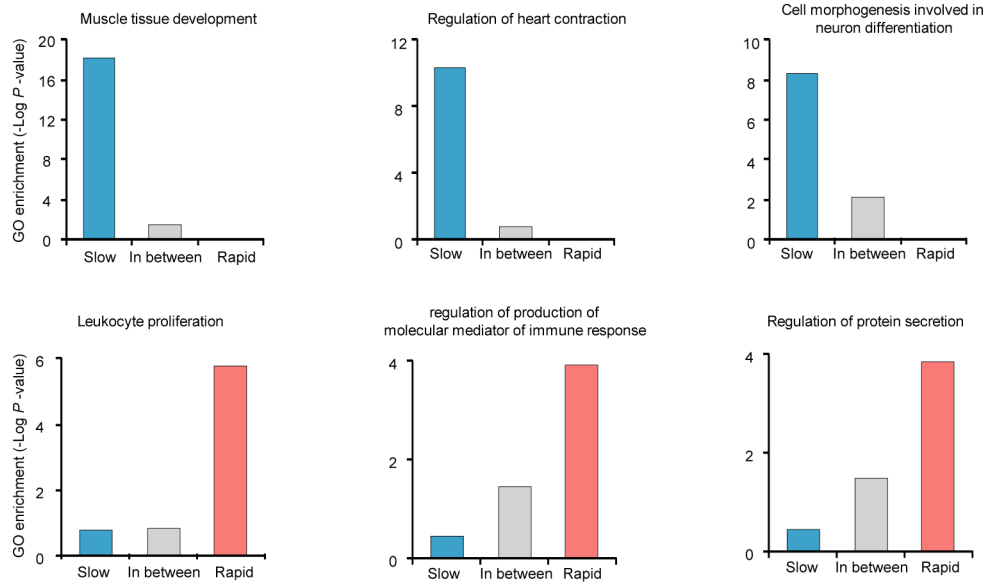

**Supplementary Figure 4:** Major differences in GO Biological Processes across the evolutionary groups. *P*-values have been calculated for multiple-testing adjustments in DAVID ([www.david.abcc.ncifcrf.gov](http://www.david.abcc.ncifcrf.gov)).

Supplementary Table 1: Evolutionary rates of human disease genes

| EntrezID | ENSGID          | dN     | dS     | dN/dS     | Disease class                             |
|----------|-----------------|--------|--------|-----------|-------------------------------------------|
| 8813     | ENSG00000000419 | 0.0536 | 0.4881 | 0.1098136 | Metabolic                                 |
| 3075     | ENSG00000000971 | 0.4804 | 1.2889 | 0.3727209 | Hematological/Renal/Ophthalmological      |
| 2729     | ENSG00000001084 | 0.0288 | 0.5331 | 0.0540236 | Hematological                             |
| 1080     | ENSG00000001626 | 0.1327 | 0.5666 | 0.234204  | Unclassified/Gastrointestinal/Respiratory |
| 889      | ENSG00000001631 | 0.0277 | 0.4293 | 0.0645236 | Neurological/Cardiovascular               |
| 8379     | ENSG00000002822 | 0.1663 | 2.1818 | 0.0762215 | Cancer                                    |
| 57679    | ENSG00000003393 | 0.0415 | 0.4987 | 0.0832164 | Neurological                              |
| 170302   | ENSG00000004848 | 0.0157 | 0.6113 | 0.025683  | Neurological/multiple                     |
| 10165    | ENSG00000004864 | 0.0228 | 0.447  | 0.0510067 | Metabolic                                 |
| 6521     | ENSG00000004939 | 0.1055 | 0.7229 | 0.14594   | Hematological/Renal                       |
| 799      | ENSG00000004948 | 0.1339 | 0.8107 | 0.1651659 | Bone                                      |
| 3207     | ENSG00000005073 | 0.0098 | 0.2021 | 0.0484908 | multiple                                  |
| 1387     | ENSG00000005339 | 0.0209 | 0.418  | 0.05      | multiple                                  |
| 4353     | ENSG00000005381 | 0.0775 | 0.7161 | 0.1082251 | Neurological/Immunological                |
| 5444     | ENSG00000005421 | 0.1048 | 0.5167 | 0.2028256 | Cardiovascular                            |
| 5244     | ENSG00000005471 | 0.0473 | 0.4803 | 0.0984801 | Gastrointestinal                          |
| 3920     | ENSG00000005893 | 0.2266 | 0.3868 | 0.5858325 | Metabolic                                 |
| 3674     | ENSG00000005961 | 0.1127 | 0.6033 | 0.1868059 | Hematological                             |
| 9244     | ENSG00000006016 | 0.0355 | 0.983  | 0.0361139 | multiple                                  |
| 6833     | ENSG00000006071 | 0.0252 | 0.6153 | 0.0409556 | Endocrine/Metabolic                       |
| 10083    | ENSG00000006611 | 0.0407 | 0.4982 | 0.0816941 | multiple/Ear,Nose,Throat                  |
| 6915     | ENSG00000006638 | 0.1383 | 5.371  | 0.0257494 | Hematological                             |
| 1352     | ENSG00000006695 | 0.1141 | 0.6577 | 0.1734834 | Neurological                              |
| 54623    | ENSG00000006712 | 0.0051 | 0.6132 | 0.008317  | Neurological/multiple                     |
| 60528    | ENSG00000006744 | 0.102  | 0.6497 | 0.1569955 | Cancer                                    |
| 8842     | ENSG00000007062 | 0.288  | 0.7615 | 0.3782009 | Ophthalmological                          |
| 5048     | ENSG00000007168 | 0.0011 | 0.2166 | 0.0050785 | Neurological/multiple                     |
| 6329     | ENSG00000007314 | 0.0329 | 0.7865 | 0.0418309 | Neurological/Renal/Muscular               |
| 5080     | ENSG00000007372 | 0.0011 | 0.2492 | 0.0044141 | Skeletal/Ophthalmological/Developmental   |
| 2328     | ENSG00000007933 | 0.1174 | 0.4995 | 0.235035  | Metabolic                                 |
| 6853     | ENSG00000008056 | 0.022  | 0.3939 | 0.0558517 | Neurological                              |
| 6792     | ENSG00000008086 | 0.039  | 0.5124 | 0.0761124 | Neurological                              |
| 10157    | ENSG00000008311 | 0.0713 | 0.5682 | 0.125484  | Metabolic                                 |
| 5310     | ENSG00000008710 | 0.1308 | 1.0658 | 0.1227247 | Renal                                     |
| 5081     | ENSG00000009709 | 0.0609 | 0.8269 | 0.0736486 | Cancer                                    |
| 10747    | ENSG00000009724 | 0.1069 | 0.5401 | 0.1979263 | Immunological                             |
| 3423     | ENSG00000010404 | 0.0801 | 0.5701 | 0.1405017 | Metabolic                                 |
| 695      | ENSG00000010671 | 0.0075 | 0.4256 | 0.0176222 | Hematological/Immunological               |
| 3077     | ENSG00000010704 | 0.1962 | 0.8489 | 0.2311226 | Metabolic                                 |
| 54903    | ENSG00000011143 | 0.0536 | 0.5463 | 0.0981146 | Developmental/multiple                    |
| 51099    | ENSG00000011198 | 0.0332 | 0.5535 | 0.0599819 | Metabolic                                 |
| 7305     | ENSG00000011600 | 0.1724 | 1.1718 | 0.1471241 | Bone                                      |
| 672      | ENSG00000012048 | 0.2957 | 0.4527 | 0.653192  | Cancer                                    |
| 240      | ENSG00000012779 | 0.0332 | 0.7734 | 0.0429273 | Respiratory/Cardiovascular                |
| 1355     | ENSG00000014919 | 0.0563 | 0.4141 | 0.1359575 | Neurological/Cardiovascular               |
| 7454     | ENSG00000015285 | 0.0661 | 0.4631 | 0.1427338 | Hematological/Immunological               |
| 29881    | ENSG00000015520 | 0.1395 | 0.7716 | 0.1807932 | Unclassified                              |
| 27032    | ENSG00000017260 | 0.0157 | 0.4061 | 0.0386604 | Dermatological                            |
| 3479     | ENSG00000017427 | 0.1201 | 0.5973 | 0.2010715 | Developmental                             |
| 6556     | ENSG00000018280 | 0.0685 | 0.9289 | 0.0737431 | Immunological                             |
| 8540     | ENSG00000018510 | 0.0542 | 0.3784 | 0.1432347 | multiple                                  |
| 477      | ENSG00000018625 | 0.004  | 0.6139 | 0.0065157 | Neurological                              |
| 6591     | ENSG00000019549 | 0.0228 | 0.4239 | 0.0537863 | multiple                                  |
| 4361     | ENSG00000020922 | 0.0636 | 0.8314 | 0.0764975 | Immunological                             |
| 11136    | ENSG00000021488 | 0.0733 | 0.7919 | 0.0925622 | Renal                                     |
| 6683     | ENSG00000021574 | 0.0398 | 0.4044 | 0.0984174 | Neurological                              |
| 1373     | ENSG00000021826 | 0.024  | 0.4641 | 0.051713  | Metabolic                                 |
| 732      | ENSG00000021852 | 0.1538 | 0.6674 | 0.2304465 | Immunological                             |
| 2554     | ENSG00000022355 | 0.0061 | 0.3962 | 0.0153963 | Neurological                              |
| 4719     | ENSG00000023228 | 0.0279 | 0.3607 | 0.0773496 | multiple                                  |
| 9821     | ENSG00000023287 | 0.0531 | 0.4309 | 0.1232304 | Cancer                                    |
| 1244     | ENSG00000023839 | 0.1344 | 0.5559 | 0.2417701 | Metabolic                                 |
| 2730     | ENSG00000023909 | 0.0199 | 0.3129 | 0.0635986 | Cardiovascular                            |
| 1890     | ENSG00000025708 | 0.1131 | 1.1062 | 0.1022419 | multiple                                  |
| 11231    | ENSG00000025796 | 0.017  | 0.3899 | 0.0436009 | Gastrointestinal                          |
| 355      | ENSG00000026103 | 0.4397 | 1.1434 | 0.3845548 | Cancer/Immunological                      |
| 960      | ENSG00000026508 | 0.1909 | 0.4547 | 0.4198373 | Hematological                             |
| 3459     | ENSG00000027697 | 0.3849 | 0.6993 | 0.5504076 | Respiratory/Immunological                 |
| 11285    | ENSG00000027847 | 0.0373 | 0.6801 | 0.0548449 | Connective tissue                         |
| 286      | ENSG00000029534 | 0.0483 | 0.6639 | 0.0727519 | Hematological/disorder/Bone               |
| 10002    | ENSG00000031544 | 0.0494 | 0.8794 | 0.0561747 | Ophthalmological                          |
| 56052    | ENSG00000033011 | 0.1283 | 0.5998 | 0.2139046 | Metabolic                                 |
| 8504     | ENSG00000034693 | 0.0293 | 0.4424 | 0.0662297 | multiple                                  |
| 4653     | ENSG00000034971 | 0.1035 | 0.6551 | 0.1579911 | Ophthalmological                          |
| 5009     | ENSG00000036473 | 0.0385 | 0.393  | 0.0979644 | Metabolic                                 |
| 846      | ENSG00000036828 | 0.0305 | 0.7239 | 0.0421329 | Endocrine                                 |
| 2324     | ENSG00000037280 | 0.0629 | 0.8518 | 0.0738436 | Hematological/Cancer                      |
| 175      | ENSG00000038002 | 0.1042 | 0.4448 | 0.2342626 | Metabolic                                 |
| 4481     | ENSG00000038945 | 0.1944 | 0.6365 | 0.3054203 | Cancer                                    |
| 999      | ENSG00000039068 | 0.1147 | 0.8001 | 0.1433571 | Cancer/Immunological                      |
| 1767     | ENSG00000039139 | 0.0558 | 0.6011 | 0.0928298 | Respiratory/multiple                      |

|        |                 |        |        |           |                                                          |
|--------|-----------------|--------|--------|-----------|----------------------------------------------------------|
| 729    | ENSG00000039537 | 0.1624 | 0.5289 | 0.3070524 | Immunological                                            |
| 1497   | ENSG00000040531 | 0.1051 | 0.7453 | 0.141017  | Renal                                                    |
| 65078  | ENSG00000040608 | 0.0759 | 0.906  | 0.0837748 | Psychiatric                                              |
| 55775  | ENSG00000042088 | 0.1055 | 0.6681 | 0.1579105 | Neurological                                             |
| 7399   | ENSG00000042781 | 0.1768 | 0.5898 | 0.2997626 | multiple/Ophthalmological                                |
| 7038   | ENSG00000042832 | 0.1642 | 0.6095 | 0.2694011 | Endocrine                                                |
| 7546   | ENSG00000043355 | 0.0055 | 0.8124 | 0.0067701 | Developmental                                            |
| 153    | ENSG00000043591 | 0.0305 | 1.1511 | 0.0264964 | Cardiovascular                                           |
| 9820   | ENSG00000044090 | 0.1208 | 0.7107 | 0.1699733 | multiple                                                 |
| 5256   | ENSG00000044446 | 0.0496 | 0.478  | 0.1037657 | Metabolic                                                |
| 8481   | ENSG00000046651 | 0.2171 | 0.549  | 0.3954463 | Skeletal                                                 |
| 1356   | ENSG00000047457 | 0.0983 | 0.5533 | 0.1776613 | Hematological/Neurological/Metabolic                     |
| 84062  | ENSG00000047579 | 0.1232 | 0.5092 | 0.2419482 | multiple                                                 |
| 7504   | ENSG00000047597 | 0.0998 | 0.6727 | 0.1483574 | Hematological                                            |
| 2978   | ENSG00000048545 | 0.0335 | 1.6547 | 0.0202454 | Ophthalmological                                         |
| 1298   | ENSG00000049089 | 0.0571 | 0.3816 | 0.1496331 | Neurological/Bone                                        |
| 1161   | ENSG00000049167 | 0.0502 | 0.6174 | 0.0813087 | multiple                                                 |
| 9563   | ENSG00000049239 | 0.088  | 0.8388 | 0.1049118 | Metabolic                                                |
| 2006   | ENSG00000049540 | 0.1875 | 0.6245 | 0.3002402 | Connective tissue/multiple/Cardiovascular                |
| 50943  | ENSG00000049768 | 0.0726 | 0.5924 | 0.1225523 | Endocrine/multiple                                       |
| 3074   | ENSG00000049860 | 0.1686 | 0.5666 | 0.2975644 | Muscular/Metabolic                                       |
| 5888   | ENSG00000051180 | 0.088  | 0.524  | 0.1679389 | Cancer                                                   |
| 1535   | ENSG00000051523 | 0.0559 | 1.662  | 0.0336342 | Immunological                                            |
| 60529  | ENSG00000052850 | 0.0323 | 0.6436 | 0.0501865 | Skeletal                                                 |
| 3909   | ENSG00000053747 | 0.1333 | 0.5871 | 0.2270482 | multiple/Dermatological                                  |
| 3784   | ENSG00000053918 | 0.0554 | 0.9813 | 0.0564557 | multiple/Cardiovascular                                  |
| 23095  | ENSG00000054523 | 0.0187 | 0.4259 | 0.043907  | Neurological                                             |
| 2296   | ENSG00000054598 | 0.0229 | 0.7096 | 0.0322717 | multiple/Ophthalmological                                |
| 2581   | ENSG00000054983 | 0.102  | 0.5628 | 0.1812367 | Neurological                                             |
| 3757   | ENSG00000055118 | 0.0175 | 0.8412 | 0.0208036 | Cardiovascular                                           |
| 3700   | ENSG00000055955 | 0.2517 | 0.8594 | 0.2928788 | Metabolic                                                |
| 3690   | ENSG00000056345 | 0.0468 | 0.6409 | 0.0730223 | Hematological                                            |
| 5318   | ENSG00000057294 | 0.1124 | 0.7217 | 0.1557434 | Cardiovascular                                           |
| 3918   | ENSG00000058085 | 0.0857 | 0.4701 | 0.1823016 | Dermatological                                           |
| 5832   | ENSG00000059573 | 0.0244 | 0.5433 | 0.0449107 | Metabolic                                                |
| 9150   | ENSG00000060069 | 0.1218 | 1.0427 | 0.1168121 | Ophthalmological                                         |
| 65125  | ENSG00000060237 | 0.0765 | 0.3804 | 0.2011041 | Endocrine                                                |
| 1301   | ENSG00000060718 | 0.034  | 0.4969 | 0.0684242 | multiple                                                 |
| 11178  | ENSG00000061337 | 0.0497 | 1.228  | 0.0404723 | Cancer                                                   |
| 1001   | ENSG00000062038 | 0.1033 | 0.84   | 0.1229762 | Dermatological                                           |
| 841    | ENSG00000064012 | 0.2316 | 0.634  | 0.3652997 | Cancer/Immunological                                     |
| 1747   | ENSG00000064195 | 0.0092 | 0.5456 | 0.0168622 | multiple/Bone                                            |
| 8625   | ENSG00000064490 | 0.0779 | 0.8238 | 0.0945618 | Immunological                                            |
| 5476   | ENSG00000064601 | 0.0669 | 0.6274 | 0.1066305 | Metabolic                                                |
| 9627   | ENSG00000064692 | 0.0771 | 0.5179 | 0.1488704 | Neurological                                             |
| 5449   | ENSG00000064835 | 0.0281 | 0.5414 | 0.0519025 | Endocrine                                                |
| 5378   | ENSG00000064933 | 0.1418 | 0.528  | 0.2685606 | Cancer                                                   |
| 4942   | ENSG00000065154 | 0.0479 | 0.6969 | 0.068733  | Metabolic                                                |
| 1308   | ENSG00000065618 | 0.098  | 0.4944 | 0.1982201 | Dermatological                                           |
| 259266 | ENSG00000066279 | 0.1948 | 0.6485 | 0.3003855 | Neurological                                             |
| 4287   | ENSG00000066427 | 0.1211 | 0.5507 | 0.2199019 | Neurological                                             |
| 9950   | ENSG00000066455 | 0.0853 | 0.6383 | 0.1336362 | Cancer                                                   |
| 2263   | ENSG00000066468 | 0.0286 | 0.4673 | 0.0612027 | Skeletal/Connective tissue/multiple/Cancer/Developmental |
| 2235   | ENSG00000066926 | 0.0633 | 0.4227 | 0.1497516 | Metabolic                                                |
| 1316   | ENSG00000067082 | 0.0237 | 0.6303 | 0.0376011 | Cancer                                                   |
| 5255   | ENSG00000067177 | 0.0277 | 0.3128 | 0.088555  | Muscular                                                 |
| 7132   | ENSG00000067182 | 0.2379 | 0.8315 | 0.2861094 | Immunological                                            |
| 865    | ENSG00000067955 | 0.005  | 0.2476 | 0.0201939 | Cancer                                                   |
| 2261   | ENSG00000068078 | 0.1403 | 1.5505 | 0.0904869 | Skeletal/Cancer                                          |
| 4205   | ENSG00000068305 | 0.0536 | 0.4578 | 0.1170817 | Cardiovascular                                           |
| 7030   | ENSG00000068323 | 0.042  | 0.4531 | 0.0926948 | Cancer                                                   |
| 2182   | ENSG00000068366 | 0.0147 | 0.3126 | 0.047025  | Neurological                                             |
| 24140  | ENSG00000068438 | 0.0641 | 0.483  | 0.1327122 | Neurological                                             |
| 5837   | ENSG00000068976 | 0.0139 | 0.7325 | 0.0189761 | Metabolic                                                |
| 10060  | ENSG00000069431 | 0.0159 | 0.76   | 0.0209211 | Cardiovascular                                           |
| 1815   | ENSG00000069696 | 0.1216 | 1.2012 | 0.1012321 | Psychiatric                                              |
| 5873   | ENSG00000069974 | 0.0235 | 0.5818 | 0.0403919 | Dermatological                                           |
| 6343   | ENSG00000070031 | 0.2508 | 0.9318 | 0.2691565 | Skeletal/Connective tissue                               |
| 8518   | ENSG00000070061 | 0.1134 | 0.4663 | 0.2431911 | Neurological                                             |
| 6710   | ENSG00000070182 | 0.0449 | 0.786  | 0.0571247 | Hematological                                            |
| 2255   | ENSG00000070193 | 0.0259 | 0.289  | 0.0896194 | Gastrointestinal                                         |
| 1258   | ENSG00000070729 | 0.1063 | 0.9279 | 0.1145598 | Ophthalmological                                         |
| 1103   | ENSG00000070748 | 0.0668 | 0.6213 | 0.1075165 | Muscular                                                 |
| 8891   | ENSG00000070785 | 0.043  | 0.3823 | 0.1124771 | Neurological                                             |
| 6949   | ENSG00000070814 | 0.326  | 0.6996 | 0.4659806 | Developmental                                            |
| 6559   | ENSG00000070915 | 0.0424 | 0.7872 | 0.0538618 | Renal                                                    |
| 224    | ENSG00000072210 | 0.1143 | 0.6704 | 0.1704952 | Metabolic                                                |
| 3028   | ENSG00000072506 | 0.0715 | 0.4607 | 0.1551986 | Metabolic                                                |
| 2213   | ENSG00000072694 | 0.4346 | 0.9041 | 0.480699  | Cancer                                                   |
| 37     | ENSG00000072778 | 0.0917 | 0.5059 | 0.1812611 | Metabolic                                                |
| 2121   | ENSG00000072840 | 0.1999 | 1.027  | 0.1946446 | Skeletal                                                 |
| 8517   | ENSG00000073009 | 0.0826 | 1.5464 | 0.0534144 | Dermatological                                           |
| 8626   | ENSG00000073282 | 0.0094 | 0.4288 | 0.0219216 | Skeletal/multiple                                        |

|       |                 |        |        |           |                                      |
|-------|-----------------|--------|--------|-----------|--------------------------------------|
| 6389  | ENSG00000073578 | 0.0284 | 0.6173 | 0.0460068 | Neurological/multiple                |
| 8647  | ENSG00000073734 | 0.108  | 0.5216 | 0.2070552 | Gastrointestinal                     |
| 2736  | ENSG00000074047 | 0.0783 | 0.9714 | 0.0806053 | multiple                             |
| 4854  | ENSG00000074181 | 0.0493 | 0.7832 | 0.0629469 | Cardiovascular                       |
| 6620  | ENSG00000074317 | 0.0157 | 0.4937 | 0.0318007 | Neurological                         |
| 7251  | ENSG00000074319 | 0.0256 | 0.4313 | 0.0593554 | Cancer                               |
| 617   | ENSG00000074582 | 0.0328 | 0.3771 | 0.0869796 | Neurological/multiple/Metabolic      |
| 3998  | ENSG00000074695 | 0.057  | 0.5814 | 0.0980392 | Hematological                        |
| 6557  | ENSG00000074803 | 0.0349 | 0.5293 | 0.0659361 | multiple                             |
| 3785  | ENSG00000075043 | 0.0098 | 0.932  | 0.010515  | Neurological                         |
| 38    | ENSG00000075239 | 0.0795 | 0.4169 | 0.1906932 | Metabolic                            |
| 5076  | ENSG00000075891 | 0.0721 | 0.3146 | 0.2291799 | multiple/Renal                       |
| 4175  | ENSG00000076003 | 0.0223 | 0.5359 | 0.0416122 | Skeletal/Metabolic                   |
| 4292  | ENSG00000076242 | 0.0662 | 0.4214 | 0.1570954 | Cancer                               |
| 7374  | ENSG00000076248 | 0.0735 | 0.7962 | 0.0923135 | Immunological                        |
| 3566  | ENSG00000077238 | 0.3553 | 1.0204 | 0.3481968 | Immunological                        |
| 5063  | ENSG00000077264 | 0.0067 | 0.3343 | 0.0200419 | Neurological                         |
| 1641  | ENSG00000077279 | 0.0025 | 0.5857 | 0.0042684 | Neurological                         |
| 7299  | ENSG00000077498 | 0.0718 | 0.6185 | 0.1160873 | multiple/Dermatological              |
| 2260  | ENSG00000077782 | 0.0071 | 0.6191 | 0.0114683 | Skeletal/multiple                    |
| 2192  | ENSG00000077942 | 0.1681 | 0.9831 | 0.1709897 | Skeletal                             |
| 5108  | ENSG00000078674 | 0.0536 | 0.4519 | 0.1186103 | Cancer                               |
| 4983  | ENSG00000079482 | 0.0413 | 0.4875 | 0.0847179 | Neurological                         |
| 1785  | ENSG00000079805 | 0.0161 | 0.9032 | 0.0178255 | Neurological                         |
| 8671  | ENSG00000080493 | 0.0154 | 0.5123 | 0.0300605 | Renal                                |
| 5663  | ENSG00000080815 | 0.0368 | 0.5262 | 0.0699354 | Neurological                         |
| 174   | ENSG00000081051 | 0.2346 | 0.6745 | 0.3478132 | Hematological                        |
| 1286  | ENSG00000081052 | 0.1549 | 0.4714 | 0.3285957 | Renal                                |
| 28962 | ENSG00000081087 | 0.131  | 0.6849 | 0.1912688 | Bone                                 |
| 5788  | ENSG00000081237 | 0.2316 | 0.7255 | 0.3192281 | Neurological/Immunological           |
| 779   | ENSG00000081248 | 0.0405 | 0.6595 | 0.0614102 | Endocrine/Neurological/Renal         |
| 5317  | ENSG00000081277 | 0.0216 | 0.5436 | 0.0397351 | Dermatological                       |
| 5205  | ENSG00000081923 | 0.0281 | 0.6488 | 0.0433107 | Gastrointestinal                     |
| 4200  | ENSG00000082212 | 0.0625 | 0.6107 | 0.1023416 | Neurological                         |
| 1741  | ENSG00000082458 | 0.0054 | 0.3162 | 0.0170778 | Neurological                         |
| 594   | ENSG00000083123 | 0.0129 | 0.6077 | 0.0212276 | Metabolic                            |
| 79977 | ENSG00000083307 | 0.0278 | 0.6452 | 0.0430874 | Ear,Nose,Throat                      |
| 5351  | ENSG00000083444 | 0.0427 | 0.9339 | 0.0457222 | Connective tissue                    |
| 5019  | ENSG00000083720 | 0.0404 | 0.5812 | 0.0695114 | Metabolic                            |
| 1540  | ENSG00000083799 | 0.0245 | 0.4456 | 0.054982  | Dermatological                       |
| 10269 | ENSG00000084073 | 0.0341 | 0.3763 | 0.0906192 | multiple/Dermatological              |
| 3034  | ENSG00000084110 | 0.0329 | 0.521  | 0.0631478 | Metabolic                            |
| 338   | ENSG00000084674 | 0.1899 | 0.5272 | 0.3602049 | Metabolic                            |
| 3030  | ENSG00000084754 | 0.0772 | 0.4537 | 0.1701565 | Metabolic                            |
| 966   | ENSG00000085063 | 0.6368 | 1.207  | 0.5275891 | Immunological                        |
| 546   | ENSG00000085224 | 0.0797 | 0.4846 | 0.1644655 | Hematological/multiple               |
| 5243  | ENSG00000085563 | 0.1152 | 0.5114 | 0.225264  | Unclassified                         |
| 55624 | ENSG00000085998 | 0.0392 | 0.4346 | 0.0901979 | multiple                             |
| 8438  | ENSG00000085999 | 0.0286 | 0.4194 | 0.0681927 | Cancer                               |
| 2683  | ENSG00000086062 | 0.0739 | 0.4416 | 0.167346  | Metabolic                            |
| 79796 | ENSG00000086848 | 0.0272 | 0.4939 | 0.0550719 | Metabolic                            |
| 8898  | ENSG00000087053 | 0.013  | 0.4185 | 0.0310633 | Neurological                         |
| 43    | ENSG00000087085 | 0.0697 | 0.7786 | 0.0895197 | Hematological                        |
| 581   | ENSG00000087088 | 0.1457 | 0.7725 | 0.1886084 | Cancer                               |
| 9509  | ENSG00000087116 | 0.055  | 0.6675 | 0.082397  | Connective tissue                    |
| 4313  | ENSG00000087245 | 0.0196 | 0.5829 | 0.033625  | Bone                                 |
| 6452  | ENSG00000087266 | 0.0978 | 0.748  | 0.1307487 | Unclassified                         |
| 118   | ENSG00000087274 | 0.0401 | 0.4248 | 0.0943974 | Cardiovascular                       |
| 79944 | ENSG00000087299 | 0.1004 | 0.4589 | 0.218784  | Metabolic                            |
| 2778  | ENSG00000087460 | 0.1868 | 0.4324 | 0.4320074 | Endocrine/multiple/Cancer/Bone       |
| 11254 | ENSG00000087916 | 0.0594 | 0.4409 | 0.1347244 | Nutritional                          |
| 29929 | ENSG00000088035 | 0.0899 | 0.443  | 0.2029345 | Metabolic                            |
| 1789  | ENSG00000088305 | 0.0784 | 0.7415 | 0.1057316 | multiple                             |
| 2160  | ENSG00000088926 | 0.1204 | 0.6026 | 0.1998009 | Hematological                        |
| 5027  | ENSG00000089041 | 0.111  | 0.745  | 0.1489933 | Cancer                               |
| 4938  | ENSG00000089127 | 0.4416 | 1.1206 | 0.3940746 | Immunological                        |
| 6910  | ENSG00000089225 | 0.0182 | 0.8082 | 0.0225192 | Developmental                        |
| 4842  | ENSG00000089250 | 0.0313 | 0.7716 | 0.0405651 | Developmental                        |
| 3476  | ENSG00000089289 | 0.1039 | 0.3178 | 0.3269352 | Neurological                         |
| 10558 | ENSG00000090054 | 0.0812 | 0.797  | 0.1018821 | Neurological                         |
| 3383  | ENSG00000090339 | 0.3826 | 1.2976 | 0.294852  | Immunological                        |
| 6476  | ENSG00000090402 | 0.1342 | 0.8316 | 0.1613757 | Metabolic                            |
| 51324 | ENSG00000090487 | 0.0102 | 0.7131 | 0.0143037 | Neurological                         |
| 7066  | ENSG00000090534 | 0.1866 | 0.2989 | 0.6242891 | Hematological                        |
| 84572 | ENSG00000090581 | 0.1258 | 0.7546 | 0.1667108 | Metabolic                            |
| 30835 | ENSG00000090659 | 0.3039 | 0.966  | 0.3145963 | Immunological                        |
| 57192 | ENSG00000090674 | 0.1004 | 1.0617 | 0.0945653 | Metabolic                            |
| 1947  | ENSG00000090776 | 0.0209 | 0.4723 | 0.0442515 | Skeletal                             |
| 10683 | ENSG00000090932 | 0.1006 | 0.8481 | 0.1186181 | Skeletal                             |
| 5459  | ENSG00000091010 | 0.0039 | 0.5575 | 0.0069955 | Ear,Nose,Throat                      |
| 5172  | ENSG00000091137 | 0.067  | 0.5165 | 0.1297193 | Ear,Nose,Throat                      |
| 1811  | ENSG00000091138 | 0.1188 | 0.5226 | 0.2273249 | Gastrointestinal                     |
| 1738  | ENSG00000091140 | 0.0423 | 0.4509 | 0.0938124 | Neurological/Metabolic/Immunological |



|        |                 |        |        |           |                                         |
|--------|-----------------|--------|--------|-----------|-----------------------------------------|
| 368    | ENSG00000091262 | 0.1204 | 0.7691 | 0.1565466 | Connective tissue                       |
| 3655   | ENSG00000091409 | 0.0341 | 0.6079 | 0.0560948 | Dermatological                          |
| 2271   | ENSG00000091483 | 0.0378 | 0.5301 | 0.0713073 | Cancer/Metabolic                        |
| 7018   | ENSG00000091513 | 0.1815 | 0.6463 | 0.2808293 | Hematological                           |
| 51168  | ENSG00000091536 | 0.0903 | 0.8315 | 0.1085989 | Ear,Nose,Throat                         |
| 350    | ENSG00000091583 | 0.1518 | 0.6863 | 0.2211861 | Metabolic                               |
| 4625   | ENSG00000092054 | 0.0109 | 0.6776 | 0.0160862 | Muscular/Cardiovascular                 |
| 1053   | ENSG00000092067 | 0.031  | 0.5568 | 0.0556753 | Immunological                           |
| 57096  | ENSG00000092200 | 0.2363 | 0.5106 | 0.4627889 | Ophthalmological                        |
| 8487   | ENSG00000092208 | 0.0303 | 0.4368 | 0.0693681 | Developmental                           |
| 7051   | ENSG00000092295 | 0.0473 | 0.6253 | 0.0756437 | Dermatological                          |
| 26227  | ENSG00000092621 | 0.0302 | 0.5289 | 0.0570996 | Metabolic                               |
| 1299   | ENSG00000092758 | 0.0652 | 0.6284 | 0.1037556 | Neurological/Bone                       |
| 201294 | ENSG00000092929 | 0.0673 | 0.757  | 0.0889036 | Hematological                           |
| 1312   | ENSG00000093010 | 0.1238 | 1.3235 | 0.0935399 | Psychiatric                             |
| 8086   | ENSG00000094914 | 0.0349 | 0.4688 | 0.0744454 | multiple                                |
| 4436   | ENSG00000095002 | 0.0409 | 0.5556 | 0.0736141 | Cancer                                  |
| 25861  | ENSG00000095397 | 0.0601 | 0.6917 | 0.0868874 | Ear,Nose,Throat                         |
| 29760  | ENSG00000095585 | 0.0951 | 0.6396 | 0.1486867 | Immunological                           |
| 53904  | ENSG00000095777 | 0.1017 | 0.4898 | 0.2076358 | Ear,Nose,Throat                         |
| 54209  | ENSG00000095970 | 0.4113 | 1.4253 | 0.2885708 | Bone                                    |
| 2289   | ENSG00000096060 | 0.0739 | 0.6538 | 0.1130315 | Psychiatric                             |
| 114327 | ENSG00000096093 | 0.0816 | 0.6718 | 0.1214647 | Neurological                            |
| 1832   | ENSG00000096696 | 0.0232 | 0.7152 | 0.0324385 | Dermatological/multiple/Cardiovascular  |
| 3717   | ENSG00000096968 | 0.0308 | 0.5091 | 0.0604989 | Hematological                           |
| 3594   | ENSG00000096996 | 0.339  | 1.1136 | 0.3044181 | Immunological                           |
| 25     | ENSG00000097007 | 0.0581 | 0.6658 | 0.0872634 | Cancer                                  |
| 6319   | ENSG00000099194 | 0.1267 | 0.8952 | 0.1415326 | Metabolic                               |
| 80270  | ENSG00000099377 | 0.0742 | 0.8196 | 0.090532  | Gastrointestinal                        |
| 3483   | ENSG00000099769 | 0.1335 | 1.853  | 0.0720453 | Endocrine                               |
| 3053   | ENSG00000099937 | 0.0857 | 0.6844 | 0.1252192 | Hematological                           |
| 9342   | ENSG00000099940 | 0.0913 | 0.6197 | 0.1473294 | Neurological                            |
| 6598   | ENSG00000099956 | 0.0011 | 0.6687 | 0.001645  | Cancer                                  |
| 51733  | ENSG00000100024 | 0.08   | 0.7483 | 0.106909  | Metabolic                               |
| 5625   | ENSG00000100033 | 0.1043 | 0.9235 | 0.1129399 | Psychiatric/Metabolic                   |
| 3957   | ENSG00000100079 | 0.225  | 0.9274 | 0.2426138 | Cardiovascular                          |
| 89781  | ENSG00000100099 | 0.2601 | 0.9103 | 0.28573   | multiple                                |
| 1414   | ENSG00000100122 | 0.1203 | 1.006  | 0.1195825 | Ophthalmological                        |
| 6663   | ENSG00000100146 | 0.0064 | 0.5913 | 0.0108236 | Neurological/multiple                   |
| 6523   | ENSG00000100170 | 0.0685 | 0.6085 | 0.1125719 | Metabolic                               |
| 7078   | ENSG00000100234 | 0.016  | 0.806  | 0.0198511 | Ophthalmological                        |
| 1727   | ENSG00000100243 | 0.1805 | 0.9885 | 0.1825999 | Hematological                           |
| 4744   | ENSG00000100285 | 0.0967 | 0.7245 | 0.1334714 | Neurological                            |
| 3162   | ENSG00000100292 | 0.0987 | 0.9265 | 0.10653   | Metabolic                               |
| 410    | ENSG00000100299 | 0.0808 | 0.6935 | 0.1165105 | Neurological                            |
| 5155   | ENSG00000100311 | 0.0526 | 0.7103 | 0.0740532 | Cancer                                  |
| 4627   | ENSG00000100345 | 0.0128 | 1.011  | 0.0126607 | Hematological/multiple/Ear,Nose,Throat  |
| 1439   | ENSG00000100368 | 0.3106 | 0.8515 | 0.3647681 | Respiratory                             |
| 2033   | ENSG00000100393 | 0.031  | 0.3704 | 0.0836933 | multiple/Cancer                         |
| 23209  | ENSG00000100427 | 0.0588 | 0.8511 | 0.0690871 | Neurological                            |
| 1690   | ENSG00000100473 | 0.0296 | 0.4212 | 0.0702754 | Neurological/Ear,Nose,Throat            |
| 5836   | ENSG00000100504 | 0.0278 | 0.5376 | 0.0517113 | Metabolic                               |
| 4522   | ENSG00000100714 | 0.0357 | 0.5292 | 0.0674603 | Developmental                           |
| 8106   | ENSG00000100836 | 0.282  | 0.6638 | 0.4248268 | Muscular                                |
| 4792   | ENSG00000100906 | 0.0391 | 0.4524 | 0.0864279 | Dermatological                          |
| 2937   | ENSG00000100983 | 0.0645 | 0.3463 | 0.1862547 | Hematological/Metabolic                 |
| 30813  | ENSG00000100987 | 0.1417 | 0.8269 | 0.1713629 | multiple/Ophthalmological               |
| 958    | ENSG00000101017 | 0.2598 | 0.9001 | 0.2886346 | Immunological                           |
| 3172   | ENSG00000101076 | 0.0186 | 0.6712 | 0.0277116 | Endocrine                               |
| 57167  | ENSG00000101115 | 0.1399 | 0.8619 | 0.1623158 | multiple                                |
| 551    | ENSG00000101200 | 0.0911 | 1.2952 | 0.0703366 | Endocrine                               |
| 1137   | ENSG00000101204 | 0.0852 | 1.1576 | 0.0736006 | Neurological/Psychiatric                |
| 85366  | ENSG00000101306 | 0.1008 | 0.5221 | 0.1930665 | Cardiovascular                          |
| 55612  | ENSG00000101311 | 0.0642 | 0.5735 | 0.1119442 | Dermatological                          |
| 182    | ENSG00000101384 | 0.0152 | 0.5407 | 0.0281117 | multiple/Ear,Nose,Throat/Cardiovascular |
| 1471   | ENSG00000101439 | 0.5289 | 1.2352 | 0.4281898 | Neurological                            |
| 5932   | ENSG00000101773 | 0.1421 | 0.3906 | 0.3637993 | Cancer                                  |
| 4281   | ENSG00000101871 | 0.0218 | 0.5823 | 0.0374377 | multiple                                |
| 2158   | ENSG00000101981 | 0.0921 | 0.4635 | 0.1987055 | Hematological                           |
| 215    | ENSG00000101986 | 0.0405 | 0.7546 | 0.0536708 | Neurological/Metabolic                  |
| 778    | ENSG00000102001 | 0.0416 | 0.5412 | 0.0768662 | Ophthalmological                        |
| 5956   | ENSG00000102076 | 0.1437 | 0.6349 | 0.2263349 | multiple/Ophthalmological               |
| 2332   | ENSG00000102081 | 0.016  | 0.1926 | 0.0830737 | Neurological                            |
| 10084  | ENSG00000102103 | 0.0694 | 0.7638 | 0.0908615 | Hematological/Neurological/multiple     |
| 6247   | ENSG00000102104 | 0.0182 | 0.6283 | 0.0289671 | Ophthalmological                        |
| 2010   | ENSG00000102119 | 0.1417 | 0.8122 | 0.1744644 | Muscular                                |
| 6901   | ENSG00000102125 | 0.0146 | 0.48   | 0.0304167 | multiple/Cardiovascular                 |
| 5230   | ENSG00000102144 | 0.0108 | 0.3088 | 0.0349741 | Hematological/Metabolic                 |
| 2623   | ENSG00000102145 | 0.0791 | 0.5655 | 0.1398762 | Hematological/Connective tissue/Cancer  |
| 6611   | ENSG00000102172 | 0.0183 | 0.3483 | 0.0525409 | Neurological/multiple                   |
| 5251   | ENSG00000102174 | 0.0203 | 0.3684 | 0.0551031 | Metabolic                               |
| 6102   | ENSG00000102218 | 0.0621 | 0.5442 | 0.1141125 | Ophthalmological                        |
| 959    | ENSG00000102245 | 0.1259 | 0.4509 | 0.2792193 | Immunological                           |

|       |                 |        |         |           |                                      |
|-------|-----------------|--------|---------|-----------|--------------------------------------|
| 2245  | ENSG00000102302 | 0.0246 | 0.3035  | 0.0810544 | Neurological/multiple                |
| 2717  | ENSG00000102393 | 0.1308 | 0.5155  | 0.2537342 | Metabolic                            |
| 2259  | ENSG00000102466 | 0.0093 | 0.1544  | 0.0602332 | Neurological                         |
| 3356  | ENSG00000102468 | 0.0442 | 0.514   | 0.0859922 | Unclassified/Nutritional/Psychiatric |
| 6445  | ENSG00000102683 | 0.104  | 0.5761  | 0.1805242 | Muscular                             |
| 1203  | ENSG00000102805 | 0.1453 | 0.6087  | 0.2387054 | Neurological                         |
| 3299  | ENSG00000102878 | 0.0706 | 0.4658  | 0.1515672 | Ophthalmological                     |
| 5257  | ENSG00000102893 | 0.0533 | 0.5471  | 0.0974228 | Metabolic                            |
| 8312  | ENSG00000103126 | 0.0687 | 0.8348  | 0.0822952 | Cancer                               |
| 23417 | ENSG00000103150 | 0.0649 | 1.0368  | 0.0625965 | Metabolic                            |
| 7249  | ENSG00000103197 | 0.0628 | 0.8374  | 0.074994  | Respiratory/multiple                 |
| 1186  | ENSG00000103249 | 0.0153 | 0.9309  | 0.0164357 | Bone                                 |
| 4210  | ENSG00000103313 | 0.4509 | 1.304   | 0.3457822 | Immunological                        |
| 1428  | ENSG00000103316 | 0.0652 | 0.4583  | 0.1422649 | Ear,Nose,Throat                      |
| 6299  | ENSG00000103449 | 0.0483 | 0.4226  | 0.1142925 | multiple                             |
| 6530  | ENSG00000103546 | 0.0359 | 0.8727  | 0.0411367 | Cardiovascular                       |
| 2184  | ENSG00000103876 | 0.0577 | 0.7493  | 0.0770052 | Metabolic                            |
| 4948  | ENSG00000104044 | 0.1379 | 0.6595  | 0.2090978 | Hematological/Dermatological         |
| 29106 | ENSG00000104112 | 0.0571 | 0.6114  | 0.0933922 | Muscular                             |
| 5157  | ENSG00000104213 | 0.0545 | 0.7551  | 0.0721759 | Cancer                               |
| 6101  | ENSG00000104237 | 0.2688 | 0.578   | 0.4650519 | Ophthalmological/Metabolic           |
| 760   | ENSG00000104267 | 0.1117 | 0.6729  | 0.1659979 | Renal                                |
| 2138  | ENSG00000104313 | 0.0177 | 0.3861  | 0.045843  | Neurological/Ophthalmological        |
| 4683  | ENSG00000104320 | 0.1883 | 0.7162  | 0.2629154 | multiple/Cancer                      |
| 54332 | ENSG00000104381 | 0.0384 | 0.2997  | 0.1281281 | Neurological                         |
| 10397 | ENSG00000104419 | 0.032  | 0.9512  | 0.0336417 | Neurological                         |
| 7227  | ENSG00000104447 | 0.0339 | 0.3038  | 0.1115866 | Developmental                        |
| 9639  | ENSG00000104728 | 0.1132 | 1.0654  | 0.1062512 | Neurological                         |
| 427   | ENSG00000104763 | 0.1527 | 0.5803  | 0.2631398 | Metabolic                            |
| 4125  | ENSG00000104774 | 0.158  | 1.0221  | 0.1545837 | Metabolic                            |
| 3972  | ENSG00000104826 | 0.2001 | 0.6953  | 0.2877894 | Endocrine                            |
| 2068  | ENSG00000104884 | 0.0115 | 0.8416  | 0.0136644 | multiple/Dermatological              |
| 268   | ENSG00000104899 | 0.1829 | 1.3852  | 0.1320387 | Developmental                        |
| 56729 | ENSG00000104918 | 0.3465 | 1.5786  | 0.2194983 | Endocrine/Cardiovascular             |
| 1760  | ENSG00000104936 | 0.1149 | 0.589   | 0.1950764 | Muscular                             |
| 7138  | ENSG00000105048 | 0.021  | 1.5814  | 0.0132794 | Muscular                             |
| 2821  | ENSG00000105220 | 0.0612 | 0.7188  | 0.0851419 | Hematological                        |
| 208   | ENSG00000105221 | 0.0089 | 0.6616  | 0.0134522 | Endocrine                            |
| 57716 | ENSG00000105227 | 0.11   | 0.701   | 0.1569187 | multiple                             |
| 7040  | ENSG00000105329 | 0.0518 | 0.9266  | 0.0559033 | Skeletal                             |
| 79784 | ENSG00000105357 | 0.0348 | 1.2586  | 0.0276498 | Ear,Nose,Throat                      |
| 3982  | ENSG00000105370 | 0.0379 | 0.6286  | 0.0602927 | Ophthalmological                     |
| 3386  | ENSG00000105371 | 0.7801 | 1.8281  | 0.4267272 | Hematological                        |
| 2109  | ENSG00000105379 | 0.0733 | 0.8167  | 0.0897514 | Metabolic                            |
| 1406  | ENSG00000105392 | 0.0159 | 0.6433  | 0.0247163 | Ophthalmological                     |
| 6822  | ENSG00000105398 | 0.3153 | 0.8287  | 0.3804754 | Immunological                        |
| 478   | ENSG00000105409 | 0.0225 | 0.8255  | 0.0272562 | Neurological                         |
| 1628  | ENSG00000105516 | 0.0394 | 0.7352  | 0.0535909 | Endocrine                            |
| 2639  | ENSG00000105607 | 0.0665 | 0.8662  | 0.0767721 | Metabolic                            |
| 26121 | ENSG00000105618 | 0.0053 | 0.7735  | 0.006852  | Ophthalmological                     |
| 3718  | ENSG00000105639 | 0.1097 | 1.5371  | 0.0713682 | Immunological                        |
| 6528  | ENSG00000105641 | 0.0874 | 1.2161  | 0.0718691 | Endocrine                            |
| 57817 | ENSG00000105697 | 0.4132 | 1.2473  | 0.3312756 | Metabolic                            |
| 6324  | ENSG00000105711 | 0.2389 | 72.2181 | 0.003308  | Neurological                         |
| 23474 | ENSG00000105755 | 0.0504 | 0.8436  | 0.059744  | Metabolic                            |
| 5445  | ENSG00000105854 | 0.0632 | 0.4541  | 0.1391764 | Cardiovascular                       |
| 8701  | ENSG00000105877 | 0.0864 | 0.5632  | 0.1534091 | Developmental/multiple               |
| 1687  | ENSG00000105928 | 0.1803 | 0.7497  | 0.2404962 | Ear,Nose,Throat                      |
| 50617 | ENSG00000105929 | 0.0865 | 0.6404  | 0.1350718 | Renal                                |
| 4233  | ENSG00000105976 | 0.0549 | 0.5049  | 0.1087344 | Cancer                               |
| 64327 | ENSG00000105983 | 0.0199 | 0.4202  | 0.0473584 | Skeletal                             |
| 3198  | ENSG00000105991 | 0.0291 | 0.4461  | 0.065232  | Neurological                         |
| 3209  | ENSG00000106031 | 0.0094 | 0.5538  | 0.0169736 | multiple                             |
| 2692  | ENSG00000106128 | 0.108  | 0.6235  | 0.1732157 | Endocrine                            |
| 3315  | ENSG00000106211 | 0.0803 | 0.9334  | 0.0860296 | Neurological                         |
| 1577  | ENSG00000106258 | 0.1883 | 0.6494  | 0.28996   | Cardiovascular                       |
| 7036  | ENSG00000106327 | 0.0813 | 0.8276  | 0.0982359 | Metabolic                            |
| 3614  | ENSG00000106348 | 0.0953 | 0.7244  | 0.1315572 | Ophthalmological                     |
| 11281 | ENSG00000106536 | 0.0332 | 0.3229  | 0.1028182 | Cancer                               |
| 2737  | ENSG00000106571 | 0.0693 | 0.607   | 0.114168  | Skeletal/multiple                    |
| 51422 | ENSG00000106617 | 0.0303 | 0.4056  | 0.0747041 | Cardiovascular                       |
| 2645  | ENSG00000106633 | 0.0248 | 0.936   | 0.0264957 | Endocrine/Metabolic                  |
| 2218  | ENSG00000106692 | 0.0534 | 0.4413  | 0.1210061 | multiple/Muscular                    |
| 7046  | ENSG00000106799 | 0.0138 | 0.4039  | 0.0341669 | Connective tissue                    |
| 2022  | ENSG00000106991 | 0.1729 | 0.7024  | 0.246156  | Cardiovascular                       |
| 203   | ENSG00000106992 | 0.078  | 0.8466  | 0.0921332 | Hematological                        |
| 7306  | ENSG00000107165 | 0.0837 | 0.4402  | 0.1901408 | Dermatological                       |
| 8022  | ENSG00000107187 | 0.0289 | 0.8755  | 0.0330097 | Endocrine                            |
| 2625  | ENSG00000107485 | 0.0144 | 0.7043  | 0.0204458 | Endocrine                            |
| 3257  | ENSG00000107521 | 0.1028 | 0.7958  | 0.1291782 | multiple                             |
| 5264  | ENSG00000107537 | 0.1978 | 0.6816  | 0.2901995 | Neurological                         |
| 6387  | ENSG00000107562 | 0.2192 | 0.898   | 0.244098  | Immunological                        |
| 8029  | ENSG00000107611 | 0.1962 | 0.658   | 0.2981763 | Hematological                        |

|        |                 |        |        |           |                                                  |
|--------|-----------------|--------|--------|-----------|--------------------------------------------------|
| 64072  | ENSG00000107736 | 0.0268 | 0.7717 | 0.0347285 | multiple/Ear,Nose,Throat                         |
| 9562   | ENSG00000107789 | 0.0977 | 0.6709 | 0.1456253 | Cancer                                           |
| 3988   | ENSG00000107798 | 0.1527 | 0.6334 | 0.2410799 | Metabolic                                        |
| 56652  | ENSG00000107815 | 0.0756 | 0.5047 | 0.149792  | Neurological/Ophthalmological                    |
| 5309   | ENSG00000107859 | 0.0071 | 0.9592 | 0.007402  | Ophthalmological                                 |
| 51684  | ENSG00000107882 | 0.0108 | 0.4012 | 0.0269192 | Cancer                                           |
| 1326   | ENSG00000107968 | 0.0316 | 0.5706 | 0.0553803 | Cancer                                           |
| 9211   | ENSG00000108231 | 0.0144 | 0.3247 | 0.0443486 | Neurological/Cancer                              |
| 1411   | ENSG00000108255 | 0.0214 | 0.448  | 0.0477679 | Ophthalmological                                 |
| 8787   | ENSG00000108370 | 0.0451 | 0.6546 | 0.068897  | Ophthalmological                                 |
| 7473   | ENSG00000108379 | 0.0046 | 0.6075 | 0.007572  | multiple                                         |
| 443    | ENSG00000108381 | 0.0681 | 0.5216 | 0.1305598 | Metabolic                                        |
| 4591   | ENSG00000108395 | 0.0376 | 0.4511 | 0.0833518 | multiple                                         |
| 5023   | ENSG00000108405 | 0.053  | 0.6757 | 0.0784372 | Hematological                                    |
| 2584   | ENSG00000108479 | 0.0621 | 0.6487 | 0.0957299 | Metabolic                                        |
| 2027   | ENSG00000108515 | 0.0104 | 0.5918 | 0.0175735 | Metabolic                                        |
| 1145   | ENSG00000108556 | 0.0615 | 1.01   | 0.0608911 | Muscular                                         |
| 10743  | ENSG00000108557 | 0.1017 | 0.7532 | 0.1350239 | multiple                                         |
| 6532   | ENSG00000108576 | 0.0393 | 0.5697 | 0.0689837 | Psychiatric                                      |
| 642    | ENSG00000108578 | 0.033  | 0.324  | 0.1018519 | Neurological                                     |
| 11216  | ENSG00000108599 | 0.0511 | 0.2632 | 0.1941489 | Developmental                                    |
| 5193   | ENSG00000108733 | 0.0646 | 0.3957 | 0.163255  | multiple                                         |
| 6928   | ENSG00000108753 | 0.0156 | 0.4347 | 0.0358868 | Endocrine/Renal                                  |
| 4669   | ENSG00000108784 | 0.0963 | 0.6855 | 0.1404814 | Metabolic                                        |
| 1277   | ENSG00000108821 | 0.0524 | 0.2785 | 0.1881508 | Connective tissue/Bone                           |
| 6442   | ENSG00000108823 | 0.063  | 0.6541 | 0.0963155 | Muscular                                         |
| 5573   | ENSG00000108946 | 0.016  | 0.6073 | 0.0263461 | multiple/Cancer/Cardiovascular                   |
| 5376   | ENSG00000109099 | 0.0739 | 0.5159 | 0.1432448 | Neurological/multiple                            |
| 2798   | ENSG00000109163 | 0.0544 | 0.6147 | 0.0884985 | Endocrine                                        |
| 26511  | ENSG00000109220 | 0.0027 | 0.1832 | 0.014738  | Cancer                                           |
| 4126   | ENSG00000109323 | 0.1533 | 0.7741 | 0.1980364 | Metabolic                                        |
| 7350   | ENSG00000109424 | 0.1269 | 0.6749 | 0.1880279 | Nutritional                                      |
| 7466   | ENSG00000109501 | 0.061  | 1.2797 | 0.0476674 | Ear,Nose,Throat/Metabolic                        |
| 6649   | ENSG00000109610 | 0.204  | 2.2196 | 0.0919085 | Unclassified                                     |
| 10891  | ENSG00000109819 | 0.0251 | 0.274  | 0.0916058 | Metabolic                                        |
| 1410   | ENSG00000109846 | 0.0106 | 0.4183 | 0.0253407 | Muscular/Ophthalmological                        |
| 1075   | ENSG00000109861 | 0.1348 | 0.5308 | 0.2539563 | multiple/Ear,Nose,Throat                         |
| 7704   | ENSG00000109906 | 0.015  | 0.5642 | 0.0265863 | Cancer                                           |
| 7007   | ENSG00000109927 | 0.0187 | 0.6548 | 0.0285583 | Ear,Nose,Throat                                  |
| 6309   | ENSG00000109929 | 0.0958 | 0.8789 | 0.1089999 | Metabolic                                        |
| 1374   | ENSG00000110090 | 0.0684 | 1.0786 | 0.0634155 | Metabolic                                        |
| 595    | ENSG00000110092 | 0.0274 | 0.8284 | 0.0330758 | Cancer                                           |
| 116519 | ENSG00000110243 | 0.1556 | 1.2041 | 0.1292251 | Metabolic                                        |
| 345    | ENSG00000110245 | 0.3649 | 0.6974 | 0.5232291 | Metabolic                                        |
| 5818   | ENSG00000110400 | 0.0244 | 0.4894 | 0.049857  | Developmental/multiple/Dermatological            |
| 8567   | ENSG00000110514 | 0.0258 | 0.4406 | 0.0585565 | Metabolic                                        |
| 5002   | ENSG00000110628 | 0.142  | 1.1425 | 0.1242888 | Cancer                                           |
| 796    | ENSG00000110680 | 0.1498 | 0.3715 | 0.4032301 | Bone                                             |
| 4728   | ENSG00000110717 | 0.0532 | 1.2274 | 0.0433437 | Neurological                                     |
| 10312  | ENSG00000110719 | 0.0846 | 1.1291 | 0.0749269 | Bone                                             |
| 11234  | ENSG00000110756 | 0.1055 | 0.4498 | 0.2345487 | multiple                                         |
| 7450   | ENSG00000110799 | 0.0882 | 0.6656 | 0.132512  | Hematological                                    |
| 4891   | ENSG00000110911 | 0.0656 | 0.4583 | 0.1431377 | Hematological                                    |
| 4598   | ENSG00000110921 | 0.1044 | 0.6891 | 0.151502  | Metabolic/Immunological                          |
| 605    | ENSG00000110987 | 0.026  | 0.5469 | 0.0475407 | Cancer                                           |
| 1594   | ENSG00000111012 | 0.0996 | 0.603  | 0.1651741 | Bone                                             |
| 4618   | ENSG00000111046 | 0.0208 | 0.3474 | 0.0598733 | Muscular                                         |
| 3875   | ENSG00000111057 | 0.0681 | 0.7448 | 0.0914339 | Gastrointestinal                                 |
| 4633   | ENSG00000111245 | 0.1545 | 1.2578 | 0.1228335 | Cardiovascular                                   |
| 3736   | ENSG00000111262 | 0.0069 | 0.4036 | 0.0170961 | Neurological                                     |
| 217    | ENSG00000111275 | 0.0298 | 0.8838 | 0.033718  | Metabolic                                        |
| 6337   | ENSG00000111319 | 0.1043 | 0.8894 | 0.1172701 | Endocrine                                        |
| 420    | ENSG00000111339 | 0.2453 | 0.7595 | 0.3229756 | Hematological                                    |
| 4256   | ENSG00000111341 | 0.0958 | 1.0226 | 0.0936828 | multiple                                         |
| 1967   | ENSG00000111361 | 0.0349 | 0.5585 | 0.0624888 | Neurological                                     |
| 7421   | ENSG00000111424 | 0.0555 | 0.7035 | 0.0788913 | Bone                                             |
| 3458   | ENSG00000111537 | 0.5618 | 0.8004 | 0.7018991 | Hematological/Respiratory/multiple/Immunological |
| 2784   | ENSG00000111664 | 0.0141 | 0.6037 | 0.023356  | Cardiovascular                                   |
| 7167   | ENSG00000111669 | 0.0244 | 0.5433 | 0.0449107 | Hematological                                    |
| 79158  | ENSG00000111670 | 0.0668 | 0.6185 | 0.1080032 | Metabolic                                        |
| 1822   | ENSG00000111676 | 0.0361 | 0.3801 | 0.094975  | Neurological                                     |
| 2998   | ENSG00000111713 | 0.0319 | 0.6077 | 0.052493  | Metabolic                                        |
| 3945   | ENSG00000111716 | 0.0101 | 0.8754 | 0.0115376 | Metabolic                                        |
| 57379  | ENSG00000111732 | 0.0365 | 0.6605 | 0.0552612 | Immunological                                    |
| 2651   | ENSG00000111846 | 0.1309 | 0.7736 | 0.1692089 | Hematological                                    |
| 4988   | ENSG00000112038 | 0.0472 | 0.8175 | 0.057737  | Neurological                                     |
| 2178   | ENSG00000112039 | 0.3881 | 0.8649 | 0.4487224 | multiple                                         |
| 7287   | ENSG00000112041 | 0.0972 | 0.8722 | 0.1114423 | Ophthalmological                                 |
| 6005   | ENSG00000112077 | 0.1454 | 0.6219 | 0.2337996 | Hematological                                    |
| 6492   | ENSG00000112246 | 0.0173 | 0.5715 | 0.0302712 | Nutritional                                      |
| 1297   | ENSG00000112280 | 0.0564 | 0.4313 | 0.1307674 | Bone                                             |
| 202    | ENSG00000112297 | 0.0816 | 0.5736 | 0.1422594 | Ophthalmological/Dermatological                  |
| 2070   | ENSG00000112319 | 0.0177 | 0.3976 | 0.0445171 | Ear,Nose,Throat/Cardiovascular                   |

|        |                 |        |        |           |                            |
|--------|-----------------|--------|--------|-----------|----------------------------|
| 10246  | ENSG00000112337 | 0.0687 | 0.4866 | 0.1411837 | Bone/Metabolic             |
| 5191   | ENSG00000112357 | 0.0398 | 0.431  | 0.0923434 | Neurological/multiple      |
| 7957   | ENSG00000112425 | 0.0517 | 0.5957 | 0.0867887 | Neurological               |
| 6908   | ENSG00000112592 | 0.0153 | 0.5077 | 0.0301359 | Neurological               |
| 5961   | ENSG00000112619 | 0.0419 | 0.8942 | 0.0468575 | Ophthalmological           |
| 7422   | ENSG00000112715 | 0.0914 | 0.2622 | 0.3485889 | Endocrine                  |
| 8838   | ENSG00000112761 | 0.1198 | 0.5003 | 0.2394563 | Skeletal/Bone              |
| 730    | ENSG00000112936 | 0.1398 | 0.5748 | 0.243215  | Immunological              |
| 2690   | ENSG00000112964 | 0.194  | 0.3954 | 0.4906424 | Skeletal                   |
| 3156   | ENSG00000113161 | 0.0368 | 0.6057 | 0.0607561 | Metabolic                  |
| 26762  | ENSG00000113249 | 0.7829 | 1.713  | 0.4570344 | Immunological              |
| 411    | ENSG00000113273 | 0.1325 | 0.6063 | 0.2185387 | Metabolic                  |
| 3593   | ENSG00000113302 | 0.2123 | 0.7742 | 0.2742185 | Respiratory                |
| 4437   | ENSG00000113318 | 0.1091 | 0.5724 | 0.190601  | Cancer                     |
| 2566   | ENSG00000113327 | 0.0048 | 0.469  | 0.0102345 | Neurological               |
| 5144   | ENSG00000113448 | 0.013  | 0.4305 | 0.0301974 | Cardiovascular             |
| 2908   | ENSG00000113580 | 0.0489 | 0.326  | 0.15      | Endocrine                  |
| 3977   | ENSG00000113594 | 0.1484 | 0.7598 | 0.1953146 | multiple                   |
| 735    | ENSG00000113600 | 0.281  | 0.7879 | 0.3566442 | Immunological              |
| 5159   | ENSG00000113721 | 0.0741 | 0.788  | 0.0940355 | Cancer                     |
| 51185  | ENSG00000113851 | 0.0194 | 0.4698 | 0.0412942 | Neurological               |
| 3827   | ENSG00000113889 | 0.3146 | 0.6392 | 0.4921777 | Hematological              |
| 3273   | ENSG00000113905 | 0.2593 | 0.6804 | 0.3810994 | Hematological              |
| 3081   | ENSG00000113924 | 0.0364 | 0.5089 | 0.0715268 | Metabolic                  |
| 10686  | ENSG00000113946 | 0.0456 | 0.6076 | 0.0750494 | Renal                      |
| 84100  | ENSG00000113966 | 0.0198 | 0.511  | 0.0387476 | multiple                   |
| 27031  | ENSG00000113971 | 0.0606 | 0.5866 | 0.1033072 | Renal                      |
| 4968   | ENSG00000114026 | 0.1386 | 0.6522 | 0.2125115 | Cancer                     |
| 5096   | ENSG00000114054 | 0.0411 | 0.5029 | 0.081726  | Metabolic                  |
| 7337   | ENSG00000114062 | 0.0239 | 0.2884 | 0.082871  | Developmental              |
| 590    | ENSG00000114200 | 0.1173 | 0.8111 | 0.1446184 | Unclassified               |
| 11235  | ENSG00000114209 | 0.0022 | 0.2311 | 0.0095197 | Neurological               |
| 1294   | ENSG00000114270 | 0.1001 | 0.3879 | 0.2580562 | Dermatological             |
| 2779   | ENSG00000114349 | 0.0024 | 1.3493 | 0.0017787 | Ophthalmological           |
| 2771   | ENSG00000114353 | 0.0083 | 0.6606 | 0.0125643 | Cancer/Cardiovascular      |
| 8287   | ENSG00000114374 | 0.0895 | 0.5343 | 0.1675089 | Endocrine                  |
| 3373   | ENSG00000114378 | 0.1622 | 0.5023 | 0.3229146 | Metabolic                  |
| 2632   | ENSG00000114480 | 0.0491 | 0.5514 | 0.0890461 | Metabolic                  |
| 7372   | ENSG00000114491 | 0.0681 | 0.677  | 0.1005908 | Metabolic                  |
| 523    | ENSG00000114573 | 0.0099 | 0.5239 | 0.0188967 | Renal                      |
| 93     | ENSG00000114739 | 0.0025 | 0.4888 | 0.0051146 | Developmental              |
| 7134   | ENSG00000114854 | 0.0026 | 0.8398 | 0.003096  | Cardiovascular             |
| 1181   | ENSG00000114859 | 0.0304 | 0.5533 | 0.0549431 | Neurological               |
| 1716   | ENSG00000114956 | 0.1473 | 0.5608 | 0.2626605 | multiple                   |
| 200576 | ENSG00000115020 | 0.0349 | 0.3777 | 0.0924014 | Ophthalmological           |
| 7535   | ENSG00000115085 | 0.0301 | 1.0586 | 0.0284338 | Immunological              |
| 5443   | ENSG00000115138 | 0.1082 | 1.4132 | 0.0765638 | Nutritional                |
| 9381   | ENSG00000115155 | 0.0236 | 0.7514 | 0.031408  | Ear,Nose,Throat            |
| 2820   | ENSG00000115159 | 0.0359 | 0.6586 | 0.0545096 | Endocrine                  |
| 8890   | ENSG00000115211 | 0.1047 | 0.4355 | 0.2404133 | Neurological               |
| 7841   | ENSG00000115275 | 0.0782 | 0.6034 | 0.1295989 | Metabolic                  |
| 2591   | ENSG00000115339 | 0.0405 | 0.5714 | 0.0708785 | Bone                       |
| 33     | ENSG00000115361 | 0.0734 | 0.6653 | 0.1103262 | Metabolic                  |
| 2202   | ENSG00000115380 | 0.0268 | 0.4855 | 0.0552008 | Ophthalmological           |
| 55120  | ENSG00000115392 | 0.1242 | 0.4507 | 0.2755713 | multiple                   |
| 6772   | ENSG00000115415 | 0.0336 | 0.6756 | 0.0497336 | Unclassified/Immunological |
| 2677   | ENSG00000115486 | 0.0593 | 0.4314 | 0.1374594 | Hematological              |
| 8869   | ENSG00000115525 | 0.0935 | 0.5739 | 0.1629204 | Neurological               |
| 79083  | ENSG00000115648 | 0.2504 | 0.8834 | 0.2834503 | Dermatological             |
| 7173   | ENSG00000115705 | 0.1516 | 1.0506 | 0.1442985 | Endocrine/Hematological    |
| 5624   | ENSG00000115718 | 0.243  | 1.3549 | 0.179349  | Hematological              |
| 4953   | ENSG00000115758 | 0.0515 | 0.5566 | 0.0925261 | Cancer                     |
| 1746   | ENSG00000115844 | 0.0236 | 0.6896 | 0.0342227 | Psychiatric                |
| 3938   | ENSG00000115850 | 0.1247 | 0.747  | 0.1669344 | Metabolic                  |
| 6654   | ENSG00000115904 | 0.0098 | 0.4176 | 0.0234674 | Connective tissue          |
| 84634  | ENSG00000116014 | 0.0865 | 1.4094 | 0.0613736 | Endocrine                  |
| 525    | ENSG00000116039 | 0.0316 | 0.7838 | 0.0403164 | Renal                      |
| 2956   | ENSG00000116062 | 0.0777 | 0.531  | 0.1463277 | Cancer                     |
| 6697   | ENSG00000116096 | 0.225  | 0.9831 | 0.2288679 | Metabolic                  |
| 7840   | ENSG00000116127 | 0.3016 | 0.5477 | 0.5506664 | Neurological               |
| 1718   | ENSG00000116133 | 0.014  | 0.6488 | 0.0215783 | Metabolic                  |
| 7827   | ENSG00000116218 | 0.077  | 0.4685 | 0.1643543 | Renal                      |
| 11315  | ENSG00000116288 | 0.0495 | 0.7255 | 0.0682288 | Neurological               |
| 3953   | ENSG00000116678 | 0.1425 | 0.491  | 0.290224  | Nutritional                |
| 9927   | ENSG00000116688 | 0.0237 | 0.5054 | 0.0468935 | Neurological               |
| 10216  | ENSG00000116690 | 0.203  | 0.5363 | 0.3785195 | Skeletal                   |
| 4688   | ENSG00000116701 | 0.1001 | 0.6966 | 0.143698  | Immunological              |
| 5132   | ENSG00000116703 | 0.0557 | 0.6652 | 0.0837342 | Neurological               |
| 6121   | ENSG00000116745 | 0.0304 | 0.4045 | 0.0751545 | Ophthalmological           |
| 270    | ENSG00000116748 | 0.0342 | 0.497  | 0.0688129 | Muscular                   |
| 1491   | ENSG00000116761 | 0.0852 | 0.7659 | 0.1112417 | Metabolic                  |
| 8458   | ENSG00000116830 | 0.1896 | 0.4883 | 0.3882859 | Endocrine                  |
| 8443   | ENSG00000116906 | 0.111  | 0.6554 | 0.1693622 | Connective tissue          |

|        |                 |        |        |           |                                         |
|--------|-----------------|--------|--------|-----------|-----------------------------------------|
| 6905   | ENSG00000116957 | 0.1589 | 0.5589 | 0.2843085 | Endocrine/multiple                      |
| 4548   | ENSG00000116984 | 0.0422 | 0.4376 | 0.0964351 | Developmental/multiple/Metabolic        |
| 9132   | ENSG00000117013 | 0.0144 | 0.5628 | 0.0255864 | Ear,Nose,Throat                         |
| 34     | ENSG00000117054 | 0.0633 | 0.9183 | 0.0689317 | Metabolic                               |
| 6390   | ENSG00000117118 | 0.0416 | 0.69   | 0.0602899 | Cancer                                  |
| 1889   | ENSG00000117298 | 0.0234 | 0.7729 | 0.0302756 | Gastrointestinal/Cardiovascular         |
| 3155   | ENSG00000117305 | 0.0645 | 0.5961 | 0.1082033 | Metabolic                               |
| 2582   | ENSG00000117308 | 0.0301 | 0.5918 | 0.0508618 | Metabolic                               |
| 9129   | ENSG00000117360 | 0.0021 | 0.3488 | 0.0060206 | Ophthalmological                        |
| 6513   | ENSG00000117394 | 0.0156 | 0.6669 | 0.0233918 | Metabolic                               |
| 4352   | ENSG00000117400 | 0.1106 | 0.3667 | 0.3016089 | Hematological                           |
| 8643   | ENSG00000117425 | 0.0462 | 0.4567 | 0.1011605 | Cancer                                  |
| 10560  | ENSG00000117479 | 0.0545 | 0.5295 | 0.1029273 | Hematological                           |
| 2166   | ENSG00000117480 | 0.0895 | 0.6231 | 0.1436367 | Psychiatric                             |
| 5825   | ENSG00000117528 | 0.023  | 0.4569 | 0.0503392 | multiple                                |
| 7292   | ENSG00000117586 | 0.4232 | 0.4554 | 0.9292929 | Cardiovascular                          |
| 3290   | ENSG00000117594 | 0.1347 | 0.7001 | 0.1924011 | Metabolic                               |
| 3664   | ENSG00000117595 | 0.0108 | 0.5059 | 0.0213481 | Skeletal/multiple/Developmental         |
| 462    | ENSG00000117601 | 0.0667 | 0.5837 | 0.114271  | Hematological                           |
| 6794   | ENSG00000118046 | 0.047  | 1.4807 | 0.0317417 | Cancer                                  |
| 335    | ENSG00000118137 | 0.2279 | 1.0279 | 0.2217142 | Neurological/Ophthalmological/Metabolic |
| 7139   | ENSG00000118194 | 0.0799 | 1.2997 | 0.0614757 | Cardiovascular                          |
| 1421   | ENSG00000118231 | 0.0961 | 0.6459 | 0.1487846 | Ophthalmological                        |
| 7276   | ENSG00000118271 | 0.1197 | 0.5685 | 0.2105541 | Unclassified/Hematological/Neurological |
| 6785   | ENSG00000118402 | 0.0438 | 0.7888 | 0.0555274 | Ophthalmological                        |
| 383    | ENSG00000118520 | 0.0762 | 0.6213 | 0.1226461 | Metabolic                               |
| 845    | ENSG00000118729 | 0.0586 | 0.6085 | 0.0963024 | Cardiovascular                          |
| 5311   | ENSG00000118762 | 0.0477 | 0.612  | 0.0779412 | Renal                                   |
| 64342  | ENSG00000118960 | 0.1399 | 0.4996 | 0.280024  | Neurological                            |
| 8074   | ENSG00000118972 | 0.1734 | 1.8642 | 0.0930158 | Bone                                    |
| 140803 | ENSG00000119121 | 0.1278 | 0.5543 | 0.2305611 | Renal                                   |
| 9414   | ENSG00000119139 | 0.0662 | 0.629  | 0.1052464 | Gastrointestinal                        |
| 22954  | ENSG00000119401 | 0.0208 | 0.6    | 0.0346667 | Muscular                                |
| 27130  | ENSG00000119509 | 0.1149 | 0.6004 | 0.1913724 | Renal                                   |
| 85365  | ENSG00000119523 | 0.1188 | 0.5698 | 0.2084942 | Metabolic                               |
| 338917 | ENSG00000119614 | 0.0143 | 0.4899 | 0.0291896 | Ophthalmological                        |
| 10577  | ENSG00000119655 | 0.1328 | 0.7013 | 0.1893626 | Metabolic                               |
| 27030  | ENSG00000119684 | 0.1746 | 0.4318 | 0.4043539 | Cancer                                  |
| 4329   | ENSG00000119711 | 0.0265 | 0.3502 | 0.075671  | Metabolic                               |
| 8892   | ENSG00000119718 | 0.0269 | 0.546  | 0.0492674 | Neurological                            |
| 26503  | ENSG00000119899 | 0.0734 | 0.6154 | 0.119272  | Metabolic                               |
| 4601   | ENSG00000119950 | 0.0211 | 0.3169 | 0.0665825 | Cancer                                  |
| 1369   | ENSG00000120054 | 0.0829 | 0.5932 | 0.1397505 | Hematological                           |
| 4488   | ENSG00000120149 | 0.04   | 0.5181 | 0.0772052 | Skeletal                                |
| 7010   | ENSG00000120156 | 0.0357 | 0.4305 | 0.0829268 | Cardiovascular                          |
| 84930  | ENSG00000120539 | 0.1443 | 0.4536 | 0.3181217 | Hematological                           |
| 7045   | ENSG00000120708 | 0.0485 | 0.5375 | 0.0902326 | Ophthalmological                        |
| 9499   | ENSG00000120729 | 0.0535 | 0.4725 | 0.1132275 | Muscular                                |
| 8795   | ENSG00000120889 | 0.6962 | 1.303  | 0.5343054 | Cancer                                  |
| 2053   | ENSG00000120915 | 0.1671 | 0.6041 | 0.2766098 | Metabolic                               |
| 8288   | ENSG00000121053 | 0.0558 | 0.6549 | 0.0852038 | Hematological                           |
| 9496   | ENSG00000121075 | 0.0324 | 0.6072 | 0.0533597 | Skeletal                                |
| 9227   | ENSG00000121207 | 0.1121 | 0.735  | 0.152517  | Ophthalmological                        |
| 89884  | ENSG00000121454 | 0.0045 | 0.3638 | 0.0123694 | Skeletal                                |
| 2703   | ENSG00000121634 | 0.0548 | 0.7917 | 0.0692181 | Ophthalmological                        |
| 9479   | ENSG00000121653 | 0.0275 | 0.5763 | 0.0477182 | Endocrine                               |
| 9409   | ENSG00000121680 | 0.0843 | 0.7643 | 0.110297  | multiple                                |
| 847    | ENSG00000121691 | 0.0524 | 0.6455 | 0.0811774 | Hematological                           |
| 7750   | ENSG00000121741 | 0.0184 | 0.3198 | 0.057536  | Cancer                                  |
| 10804  | ENSG00000121742 | 0.0212 | 0.9359 | 0.022652  | Ear,Nose,Throat/Dermatological          |
| 2700   | ENSG00000121743 | 0.151  | 1.7034 | 0.0886462 | Ophthalmological                        |
| 5290   | ENSG00000121879 | 0.0061 | 0.5373 | 0.0113531 | Cancer                                  |
| 7852   | ENSG00000121966 | 0.0566 | 0.8309 | 0.0681189 | Immunological                           |
| 2322   | ENSG00000122025 | 0.0811 | 0.6577 | 0.1233085 | Cancer                                  |
| 7512   | ENSG00000122121 | 0.1152 | 0.5249 | 0.2194704 | Immunological                           |
| 4952   | ENSG00000122126 | 0.0419 | 0.4264 | 0.0982645 | Renal/Metabolic                         |
| 50945  | ENSG00000122145 | 0.1667 | 0.4012 | 0.4155035 | Developmental/Connective tissue         |
| 5340   | ENSG00000122194 | 0.1243 | 0.7809 | 0.1591753 | Hematological/Ophthalmological          |
| 5395   | ENSG00000122512 | 0.1422 | 0.6059 | 0.2346922 | multiple/Cancer                         |
| 51251  | ENSG00000122643 | 0.0298 | 0.7201 | 0.0413831 | Hematological                           |
| 7291   | ENSG00000122691 | 0.0133 | 0.6076 | 0.0218894 | Developmental                           |
| 27019  | ENSG00000122735 | 0.0586 | 0.4772 | 0.1227997 | Respiratory/multiple                    |
| 8805   | ENSG00000122779 | 0.0323 | 0.3936 | 0.082063  | Cancer                                  |
| 5328   | ENSG00000122861 | 0.2117 | 0.5373 | 0.3940071 | Neurological                            |
| 9469   | ENSG00000122863 | 0.0641 | 1.0426 | 0.0614809 | Skeletal                                |
| 1959   | ENSG00000122877 | 0.0556 | 0.4925 | 0.1128934 | Neurological/multiple                   |
| 35     | ENSG00000122971 | 0.0504 | 0.6944 | 0.0725806 | Metabolic                               |
| 23389  | ENSG00000123066 | 0.0393 | 0.4762 | 0.0825283 | Developmental                           |
| 540    | ENSG00000123191 | 0.1019 | 0.5813 | 0.1752967 | Metabolic                               |
| 10133  | ENSG00000123240 | 0.1205 | 0.706  | 0.1706799 | Ophthalmological                        |
| 1621   | ENSG00000123454 | 0.1241 | 1.2003 | 0.1033908 | Neurological/Metabolic                  |
| 1300   | ENSG00000123500 | 0.0777 | 0.4239 | 0.1832979 | Skeletal/Connective tissue              |
| 6906   | ENSG00000123561 | 0.1513 | 0.4369 | 0.3463035 | Hematological                           |

|        |                 |        |        |           |                                                     |
|--------|-----------------|--------|--------|-----------|-----------------------------------------------------|
| 3759   | ENSG00000123700 | 0.0065 | 0.6509 | 0.0099862 | Cardiovascular                                      |
| 4159   | ENSG00000124089 | 0.0537 | 1.1443 | 0.0469283 | Nutritional                                         |
| 9217   | ENSG00000124164 | 0.0488 | 0.4876 | 0.100082  | Neurological/Muscular                               |
| 10564  | ENSG00000124198 | 0.0219 | 0.5399 | 0.0405631 | Neurological                                        |
| 1908   | ENSG00000124205 | 0.3066 | 0.5304 | 0.5780543 | Gastrointestinal/Respiratory/multiple               |
| 5740   | ENSG00000124212 | 0.1043 | 0.7014 | 0.1487026 | Cardiovascular                                      |
| 4552   | ENSG00000124275 | 0.1386 | 0.7011 | 0.1976893 | Developmental/Metabolic                             |
| 5184   | ENSG00000124299 | 0.0597 | 0.9497 | 0.062862  | Connective tissue                                   |
| 4693   | ENSG00000124479 | 0.0212 | 0.3346 | 0.0633592 | Neurological/Ophthalmological                       |
| 2162   | ENSG00000124491 | 0.0712 | 0.6356 | 0.1120201 | Hematological                                       |
| 5190   | ENSG00000124587 | 0.0725 | 0.5397 | 0.1343339 | multiple                                            |
| 4337   | ENSG00000124615 | 0.0856 | 0.6031 | 0.1419333 | Metabolic                                           |
| 27232  | ENSG00000124713 | 0.0371 | 0.627  | 0.0591707 | Metabolic                                           |
| 2739   | ENSG00000124767 | 0.0548 | 1.0268 | 0.0533697 | Psychiatric                                         |
| 6310   | ENSG00000124788 | 0.0509 | 0.6231 | 0.0816883 | Neurological                                        |
| 860    | ENSG00000124813 | 0.0112 | 0.214  | 0.0523364 | Skeletal                                            |
| 9247   | ENSG00000124827 | 0.207  | 0.5411 | 0.3825541 | Endocrine                                           |
| 583    | ENSG00000125124 | 0.0556 | 0.4823 | 0.1152809 | multiple                                            |
| 6555   | ENSG00000125255 | 0.124  | 0.6779 | 0.1829178 | Gastrointestinal                                    |
| 3659   | ENSG00000125347 | 0.0749 | 0.6857 | 0.1092314 | Hematological/Muscular/Cancer                       |
| 6662   | ENSG00000125398 | 0.0111 | 0.8203 | 0.0135316 | Skeletal                                            |
| 4620   | ENSG00000125414 | 0.0158 | 0.5947 | 0.0265684 | Muscular                                            |
| 60386  | ENSG00000125454 | 0.1371 | 0.6954 | 0.1971527 | Neurological                                        |
| 7270   | ENSG00000125482 | 0.3418 | 0.9518 | 0.3591091 | Neurological/multiple                               |
| 3553   | ENSG00000125538 | 0.2078 | 0.5272 | 0.3941578 | Cancer                                              |
| 7849   | ENSG00000125618 | 0.0081 | 0.4387 | 0.0184636 | Endocrine                                           |
| 718    | ENSG00000125730 | 0.1335 | 0.9641 | 0.1384711 | Immunological                                       |
| 80207  | ENSG00000125741 | 0.1701 | 1.6507 | 0.1030472 | Ophthalmological/Metabolic                          |
| 80025  | ENSG00000125779 | 0.0503 | 0.3316 | 0.1516888 | Neurological/Metabolic                              |
| 8195   | ENSG00000125863 | 0.1343 | 0.4223 | 0.3180204 | Developmental/multiple                              |
| 3704   | ENSG00000125877 | 0.0589 | 0.8212 | 0.0717243 | Metabolic                                           |
| 8200   | ENSG00000125965 | 0.0369 | 0.3301 | 0.1117843 | Skeletal                                            |
| 8242   | ENSG00000126012 | 0.0238 | 0.3809 | 0.0624836 | Neurological                                        |
| 7389   | ENSG00000126088 | 0.038  | 0.3602 | 0.1054969 | Metabolic                                           |
| 7517   | ENSG00000126215 | 0.1708 | 0.9797 | 0.1743391 | Cancer                                              |
| 2159   | ENSG00000126218 | 0.1401 | 1.4482 | 0.0967408 | Hematological                                       |
| 57152  | ENSG00000126233 | 0.1916 | 0.8895 | 0.2154019 | Dermatological                                      |
| 7067   | ENSG00000126351 | 0.0178 | 0.1773 | 0.1003948 | Cancer                                              |
| 435    | ENSG00000126522 | 0.0312 | 0.822  | 0.0379562 | Metabolic                                           |
| 51119  | ENSG00000126524 | 0.0129 | 0.688  | 0.01875   | multiple                                            |
| 65266  | ENSG00000126562 | 0.0685 | 0.4828 | 0.1418807 | Endocrine                                           |
| 5582   | ENSG00000126583 | 0.0096 | 0.6942 | 0.0138289 | Neurological                                        |
| 6756   | ENSG00000126752 | 0.7221 | 0.9695 | 0.7448169 | Cancer                                              |
| 5199   | ENSG00000126759 | 0.1403 | 0.5622 | 0.2495553 | Immunological                                       |
| 8021   | ENSG00000126883 | 0.1311 | 0.5158 | 0.2541683 | Cancer                                              |
| 554    | ENSG00000126895 | 0.1826 | 0.7836 | 0.2330271 | Endocrine/Renal                                     |
| 1678   | ENSG00000126953 | 0.1431 | 1.2897 | 0.110956  | Neurological/Ear,Nose,Throat                        |
| 3425   | ENSG00000127415 | 0.1747 | 1.2319 | 0.1418135 | Metabolic                                           |
| 8139   | ENSG00000127688 | 0.0093 | 0.7262 | 0.0128064 | Neurological                                        |
| 25953  | ENSG00000127838 | 0.0192 | 0.4354 | 0.0440974 | Neurological                                        |
| 6049   | ENSG00000127870 | 0.1504 | 0.6317 | 0.2380877 | Cancer                                              |
| 5782   | ENSG00000127947 | 0.0816 | 0.5221 | 0.1562919 | Cancer                                              |
| 5447   | ENSG00000127948 | 0.0738 | 1.4727 | 0.050112  | Endocrine/Unclassified/Metabolic                    |
| 5189   | ENSG00000127980 | 0.1058 | 0.5091 | 0.2078177 | Neurological/multiple                               |
| 8910   | ENSG00000127990 | 0.0884 | 0.6316 | 0.139962  | Neurological                                        |
| 3791   | ENSG00000128052 | 0.0822 | 0.5251 | 0.1565416 | Cancer                                              |
| 53947  | ENSG00000128274 | 0.1167 | 1.2826 | 0.0909871 | Hematological                                       |
| 5880   | ENSG00000128340 | 0.0044 | 0.975  | 0.0045128 | Immunological                                       |
| 3872   | ENSG00000128422 | 0.0228 | 0.6431 | 0.0354533 | Dermatological                                      |
| 93986  | ENSG00000128573 | 0.006  | 0.2688 | 0.0223214 | Neurological                                        |
| 6608   | ENSG00000128602 | 0.0333 | 0.4652 | 0.0715821 | Cancer                                              |
| 611    | ENSG00000128617 | 0.0764 | 0.4618 | 0.1654396 | Ophthalmological                                    |
| 3236   | ENSG00000128710 | 0.0064 | 0.1165 | 0.0549356 | Skeletal/Neurological                               |
| 3239   | ENSG00000128714 | 0.0233 | 0.7612 | 0.0306096 | Skeletal                                            |
| 6638   | ENSG00000128739 | 0.0042 | 0.3428 | 0.012252  | multiple                                            |
| 161582 | ENSG00000128845 | 0.1191 | 0.8897 | 0.1338653 | Psychiatric                                         |
| 3712   | ENSG00000128928 | 0.0479 | 0.5472 | 0.0875365 | Metabolic                                           |
| 54982  | ENSG00000128973 | 0.0425 | 0.8824 | 0.0481641 | Neurological                                        |
| 8048   | ENSG00000129170 | 0.0094 | 0.4237 | 0.0221855 | Cardiovascular                                      |
| 23746  | ENSG00000129221 | 0.0608 | 1.2663 | 0.0480139 | Ophthalmological                                    |
| 9526   | ENSG00000129255 | 0.3476 | 1.0359 | 0.3355536 | Metabolic                                           |
| 4901   | ENSG00000129535 | 0.0567 | 0.6553 | 0.0865253 | Ophthalmological                                    |
| 15     | ENSG00000129673 | 0.0819 | 0.9687 | 0.0845463 | Psychiatric                                         |
| 9459   | ENSG00000129675 | 0.0416 | 0.3959 | 0.105077  | Neurological                                        |
| 1028   | ENSG00000129757 | 0.329  | 1.1603 | 0.2835474 | multiple                                            |
| 7137   | ENSG00000129991 | 0.0321 | 0.56   | 0.0573214 | Cardiovascular                                      |
| 2593   | ENSG00000130005 | 0.1775 | 1.4475 | 0.1226252 | Metabolic                                           |
| 6303   | ENSG00000130066 | 0.1681 | 0.7334 | 0.2292064 | Dermatological                                      |
| 3949   | ENSG00000130164 | 0.1239 | 1.2038 | 0.1029241 | Metabolic                                           |
| 5589   | ENSG00000130175 | 0.068  | 1.1865 | 0.0573114 | Gastrointestinal                                    |
| 348    | ENSG00000130203 | 0.1612 | 1.1234 | 0.143493  | Hematological/Neurological/Cardiovascular/Metabolic |
| 9210   | ENSG00000130385 | 0.2374 | 0.5297 | 0.4481782 | Endocrine                                           |
| 81     | ENSG00000130402 | 0.0063 | 0.9179 | 0.0068635 | Renal                                               |

|        |                 |        |        |           |                                             |
|--------|-----------------|--------|--------|-----------|---------------------------------------------|
| 6295   | ENSG00000130561 | 0.0773 | 0.5185 | 0.1490839 | Ophthalmological                            |
| 7140   | ENSG00000130595 | 0.0611 | 1.0439 | 0.0585305 | Developmental                               |
| 7136   | ENSG00000130598 | 0.0178 | 1.0469 | 0.0170026 | Developmental                               |
| 1289   | ENSG00000130635 | 0.0345 | 0.4981 | 0.0692632 | Connective tissue                           |
| 25814  | ENSG00000130638 | 0.11   | 0.5797 | 0.1897533 | Neurological                                |
| 3110   | ENSG00000130675 | 0.0492 | 1.1718 | 0.0419867 | Skeletal                                    |
| 445    | ENSG00000130707 | 0.0163 | 0.6758 | 0.0241196 | Metabolic                                   |
| 10585  | ENSG00000130714 | 0.082  | 0.7548 | 0.108638  | multiple/Muscular                           |
| 1736   | ENSG00000130826 | 0.0486 | 0.4456 | 0.1090664 | multiple/Dermatological                     |
| 3293   | ENSG00000130948 | 0.179  | 0.5906 | 0.3030816 | Developmental                               |
| 2670   | ENSG00000131095 | 0.1059 | 0.89   | 0.1189888 | multiple                                    |
| 6569   | ENSG00000131183 | 0.0459 | 0.7976 | 0.0575476 | Bone/Metabolic                              |
| 2161   | ENSG00000131187 | 0.1664 | 0.8623 | 0.1929723 | Hematological                               |
| 5538   | ENSG00000131238 | 0.0822 | 0.5519 | 0.14894   | Neurological                                |
| 22     | ENSG00000131269 | 0.0421 | 0.2781 | 0.1513844 | Hematological                               |
| 2538   | ENSG00000131482 | 0.0605 | 0.6921 | 0.0874151 | Metabolic                                   |
| 1729   | ENSG00000131504 | 0.0466 | 0.464  | 0.100431  | Ear,Nose,Throat                             |
| 261734 | ENSG00000131697 | 0.1241 | 0.8811 | 0.1408467 | Renal                                       |
| 7153   | ENSG00000131747 | 0.0786 | 0.6099 | 0.1288736 | Metabolic                                   |
| 2488   | ENSG00000131808 | 0.0736 | 0.6468 | 0.113791  | Endocrine                                   |
| 5160   | ENSG00000131828 | 0.0108 | 0.6022 | 0.0179342 | Neurological/Metabolic                      |
| 64087  | ENSG00000131844 | 0.0623 | 0.6656 | 0.0935998 | Metabolic                                   |
| 8431   | ENSG00000131910 | 0.1231 | 0.6969 | 0.1766394 | Nutritional                                 |
| 4148   | ENSG00000132031 | 0.0893 | 0.5842 | 0.1528586 | Skeletal/Connective tissue/Bone             |
| 5468   | ENSG00000132170 | 0.0194 | 0.4386 | 0.0442316 | Endocrine/Nutritional/Cancer/Metabolic      |
| 8864   | ENSG00000132326 | 0.1092 | 0.7607 | 0.143552  | Neurological                                |
| 1644   | ENSG00000132437 | 0.06   | 0.6994 | 0.0857878 | Metabolic                                   |
| 10117  | ENSG00000132464 | 0.2422 | 0.4973 | 0.48703   | Connective tissue/Bone                      |
| 3691   | ENSG00000132470 | 0.0582 | 0.7726 | 0.0753301 | Dermatological                              |
| 3000   | ENSG00000132518 | 0.0806 | 0.7873 | 0.1023752 | Neurological/Ophthalmological/Immunological |
| 157680 | ENSG00000132549 | 0.0685 | 0.4464 | 0.1534498 | multiple                                    |
| 3508   | ENSG00000132740 | 0.128  | 0.8675 | 0.1475504 | Muscular                                    |
| 4595   | ENSG00000132781 | 0.1399 | 0.5302 | 0.2638627 | Cancer                                      |
| 29958  | ENSG00000132837 | 0.0543 | 0.5627 | 0.096499  | Metabolic                                   |
| 8546   | ENSG00000132842 | 0.071  | 0.5498 | 0.1291379 | multiple                                    |
| 5145   | ENSG00000132915 | 0.026  | 0.7138 | 0.0364248 | Ophthalmological                            |
| 241    | ENSG00000132965 | 0.0434 | 0.7316 | 0.059322  | Cardiovascular                              |
| 4626   | ENSG00000133020 | 0.0147 | 0.6743 | 0.0218004 | multiple                                    |
| 6341   | ENSG00000133028 | 0.1619 | 0.5553 | 0.2915541 | Gastrointestinal                            |
| 23111  | ENSG00000133104 | 0.0776 | 0.852  | 0.0910798 | Neurological                                |
| 122042 | ENSG00000133105 | 0.1076 | 0.5654 | 0.1903077 | Renal                                       |
| 5994   | ENSG00000133111 | 0.1196 | 0.9638 | 0.1240921 | Immunological                               |
| 9365   | ENSG00000133116 | 0.0781 | 0.6149 | 0.1270125 | Cardiovascular                              |
| 2048   | ENSG00000133216 | 0.0026 | 0.75   | 0.0034667 | Cancer                                      |
| 5158   | ENSG00000133256 | 0.0327 | 1.1269 | 0.0290177 | Ophthalmological                            |
| 9215   | ENSG00000133424 | 0.0106 | 0.7029 | 0.0150804 | Muscular                                    |
| 3845   | ENSG00000133703 | 0.0049 | 0.2186 | 0.0224154 | Cancer                                      |
| 11005  | ENSG00000133710 | 0.2341 | 0.6738 | 0.3474325 | Dermatological/Immunological                |
| 272    | ENSG00000133805 | 0.0336 | 0.671  | 0.0500745 | Hematological                               |
| 81846  | ENSG00000133812 | 0.03   | 0.4255 | 0.0705053 | Neurological                                |
| 3295   | ENSG00000133835 | 0.1084 | 0.6167 | 0.1757743 | Metabolic                                   |
| 4221   | ENSG00000133895 | 0.0163 | 0.65   | 0.0250769 | Endocrine/Cancer                            |
| 7428   | ENSG00000134086 | 0.0763 | 0.6518 | 0.1170604 | Hematological/Cancer                        |
| 2780   | ENSG00000134183 | 0.0217 | 0.5477 | 0.0396202 | Ophthalmological                            |
| 7252   | ENSG00000134200 | 0.0875 | 0.6218 | 0.1407205 | Endocrine                                   |
| 3158   | ENSG00000134240 | 0.055  | 0.5115 | 0.1075269 | Metabolic                                   |
| 26191  | ENSG00000134242 | 0.1851 | 0.484  | 0.382438  | Endocrine/Connective tissue/Immunological   |
| 4803   | ENSG00000134259 | 0.081  | 0.5013 | 0.1615799 | Neurological                                |
| 4613   | ENSG00000134323 | 0.2453 | 1.4053 | 0.1745535 | multiple                                    |
| 3939   | ENSG00000134333 | 0.0332 | 0.7492 | 0.0443139 | Metabolic                                   |
| 79577  | ENSG00000134371 | 0.0004 | 0.3706 | 0.0010793 | Endocrine/Cancer                            |
| 23418  | ENSG00000134376 | 0.1436 | 0.4319 | 0.3324844 | Ophthalmological                            |
| 3559   | ENSG00000134460 | 0.2721 | 0.7546 | 0.3605884 | Immunological                               |
| 4607   | ENSG00000134571 | 0.05   | 0.7124 | 0.0701853 | Cardiovascular                              |
| 1643   | ENSG00000134574 | 0.1174 | 0.485  | 0.2420619 | Dermatological                              |
| 83844  | ENSG00000134588 | 0.6181 | 0.7925 | 0.7799369 | Renal                                       |
| 6658   | ENSG00000134595 | 0.0347 | 0.5541 | 0.0626241 | Endocrine/Neurological                      |
| 1828   | ENSG00000134760 | 0.1159 | 0.7495 | 0.1546364 | Dermatological                              |
| 1837   | ENSG00000134769 | 0.0171 | 0.4077 | 0.0419426 | Cardiovascular                              |
| 2694   | ENSG00000134812 | 0.111  | 0.5015 | 0.221336  | Hematological                               |
| 5156   | ENSG00000134853 | 0.0435 | 0.6055 | 0.0718415 | Hematological/Cancer                        |
| 2073   | ENSG00000134899 | 0.2038 | 0.7363 | 0.2767894 | multiple/Dermatological                     |
| 324    | ENSG00000134982 | 0.0467 | 0.5259 | 0.0888002 | Cancer                                      |
| 10993  | ENSG00000135094 | 0.093  | 0.8588 | 0.1082906 | multiple                                    |
| 6927   | ENSG00000135100 | 0.0217 | 0.7621 | 0.028474  | Endocrine/Cancer                            |
| 6926   | ENSG00000135111 | 0.026  | 0.8065 | 0.0322381 | multiple                                    |
| 948    | ENSG00000135218 | 0.0925 | 0.598  | 0.1546823 | Hematological/Immunological                 |
| 5630   | ENSG00000135406 | 0.0207 | 0.964  | 0.021473  | Neurological/Ophthalmological               |
| 269    | ENSG00000135409 | 0.1237 | 0.4296 | 0.2879423 | Developmental                               |
| 3679   | ENSG00000135424 | 0.0631 | 0.5435 | 0.1160994 | Muscular                                    |
| 5959   | ENSG00000135437 | 0.0723 | 0.458  | 0.1578603 | Ophthalmological                            |
| 1019   | ENSG00000135446 | 0.0288 | 0.4522 | 0.0636886 | Cancer                                      |
| 91     | ENSG00000135503 | 0.0081 | 0.4709 | 0.0172011 | Cancer                                      |

|        |                 |        |         |           |                                                           |
|--------|-----------------|--------|---------|-----------|-----------------------------------------------------------|
| 4284   | ENSG00000135517 | 0.0368 | 0.3869  | 0.095115  | Ophthalmological                                          |
| 54806  | ENSG00000135541 | 0.1181 | 0.6965  | 0.1695621 | multiple                                                  |
| 8291   | ENSG00000135636 | 0.029  | 0.6582  | 0.0440596 | Muscular                                                  |
| 2799   | ENSG00000135677 | 0.041  | 0.7376  | 0.0555857 | Metabolic                                                 |
| 4193   | ENSG00000135679 | 0.0886 | 0.7929  | 0.1117417 | Cancer                                                    |
| 183    | ENSG00000135744 | 0.2843 | 1.2222  | 0.2326133 | Renal/Cardiovascular                                      |
| 6041   | ENSG00000135828 | 0.2721 | 0.6733  | 0.4041289 | Cancer                                                    |
| 1144   | ENSG00000135902 | 0.0798 | 0.8534  | 0.0935083 | Muscular                                                  |
| 5077   | ENSG00000135903 | 0.0056 | 0.4069  | 0.0137626 | multiple/Cancer                                           |
| 80704  | ENSG00000135917 | 0.2164 | 0.6581  | 0.3288254 | Neurological                                              |
| 1593   | ENSG00000135929 | 0.1636 | 0.6805  | 0.2404115 | Metabolic                                                 |
| 10913  | ENSG00000135960 | 0.0396 | 0.7439  | 0.053233  | Dermatological                                            |
| 2317   | ENSG00000136068 | 0.0222 | 0.6039  | 0.0367611 | Skeletal/Connective tissue                                |
| 8803   | ENSG00000136143 | 0.0458 | 0.4842  | 0.094589  | multiple                                                  |
| 51131  | ENSG00000136147 | 0.3442 | 0.6134  | 0.5611347 | Respiratory/Immunological                                 |
| 9445   | ENSG00000136156 | 0.0217 | 0.8014  | 0.0270776 | Neurological                                              |
| 1910   | ENSG00000136160 | 0.0668 | 0.511   | 0.1307241 | Gastrointestinal/multiple                                 |
| 3569   | ENSG00000136244 | 0.6991 | 0.9326  | 0.7496247 | Immunological                                             |
| 3364   | ENSG00000136273 | 0.0851 | 0.6312  | 0.1348226 | Skeletal/multiple/Developmental                           |
| 83605  | ENSG00000136280 | 0.0391 | 0.522   | 0.0749042 | Neurological                                              |
| 7080   | ENSG00000136352 | 0.0066 | 0.5736  | 0.0115063 | Neurological/multiple                                     |
| 83990  | ENSG00000136492 | 0.1536 | 0.5747  | 0.2672699 | multiple/Cancer                                           |
| 6326   | ENSG00000136531 | 0.0103 | 0.5714  | 0.0180259 | Neurological                                              |
| 2626   | ENSG00000136574 | 0.0306 | 0.5915  | 0.0517329 | Cardiovascular                                            |
| 3586   | ENSG00000136634 | 0.1522 | 0.6227  | 0.2444195 | Connective tissue/Immunological                           |
| 3557   | ENSG00000136689 | 0.2249 | 0.8652  | 0.2599399 | Cancer                                                    |
| 55997  | ENSG00000136698 | 0.3748 | 1.565   | 0.2394888 | Developmental/multiple/Cardiovascular                     |
| 56262  | ENSG00000136802 | 0.0045 | 0.8757  | 0.0051387 | Hematological                                             |
| 1861   | ENSG00000136827 | 0.0435 | 0.7944  | 0.0547583 | Neurological                                              |
| 55755  | ENSG00000136861 | 0.1864 | 0.4972  | 0.3748994 | Neurological                                              |
| 7099   | ENSG00000136869 | 0.2435 | 0.6012  | 0.4050233 | Immunological                                             |
| 229    | ENSG00000136872 | 0.0217 | 0.3854  | 0.0563051 | Metabolic                                                 |
| 570    | ENSG00000136881 | 0.2186 | 0.5936  | 0.3682615 | Gastrointestinal                                          |
| 9568   | ENSG00000136928 | 0.0143 | 0.7696  | 0.0185811 | Psychiatric                                               |
| 2516   | ENSG00000136931 | 0.0305 | 0.8674  | 0.0351626 | Endocrine/Unclassified                                    |
| 7507   | ENSG00000136936 | 0.1862 | 1.132   | 0.1644876 | Dermatological                                            |
| 4010   | ENSG00000136944 | 0.0006 | 0.6168  | 0.0009728 | multiple                                                  |
| 4609   | ENSG00000136997 | 0.045  | 0.6887  | 0.0653405 | Cancer                                                    |
| 54840  | ENSG00000137074 | 0.1123 | 0.4083  | 0.2750429 | Neurological                                              |
| 9380   | ENSG00000137106 | 0.2399 | 0.7473  | 0.3210223 | Metabolic                                                 |
| 9856   | ENSG00000137261 | 0.1419 | 0.5373  | 0.2640983 | Psychiatric                                               |
| 3662   | ENSG00000137265 | 0.0385 | 0.5459  | 0.0705257 | Cancer                                                    |
| 7172   | ENSG00000137364 | 0.1125 | 0.6325  | 0.1778656 | Metabolic                                                 |
| 4647   | ENSG00000137474 | 0.0151 | 0.8406  | 0.0179634 | multiple/Ear,Nose,Throat                                  |
| 4926   | ENSG00000137497 | 0.0977 | 0.6861  | 0.1423991 | Cancer                                                    |
| 7274   | ENSG00000137561 | 0.0591 | 0.4737  | 0.1247625 | Neurological                                              |
| 7225   | ENSG00000137672 | 0.0332 | 0.5065  | 0.0655479 | Renal                                                     |
| 2542   | ENSG00000137700 | 0.0377 | 0.5587  | 0.0674781 | Metabolic                                                 |
| 5519   | ENSG00000137713 | 0.0496 | 0.4804  | 0.1032473 | Cancer                                                    |
| 486    | ENSG00000137731 | 0.3514 | 59.5626 | 0.0058997 | Renal                                                     |
| 1588   | ENSG00000137869 | 0.1211 | 0.6615  | 0.1830688 | Developmental/Metabolic                                   |
| 1629   | ENSG00000137992 | 0.0654 | 0.5801  | 0.1127392 | Metabolic                                                 |
| 3032   | ENSG00000138029 | 0.0451 | 0.3846  | 0.1172647 | Metabolic                                                 |
| 3795   | ENSG00000138030 | 0.1361 | 0.61    | 0.2231148 | Metabolic                                                 |
| 3973   | ENSG00000138039 | 0.1039 | 0.521   | 0.1994242 | Endocrine/Developmental/Renal/Cancer                      |
| 1545   | ENSG00000138061 | 0.1055 | 0.8359  | 0.1262113 | Developmental/Ophthalmological                            |
| 64240  | ENSG00000138075 | 0.1131 | 0.647   | 0.1748068 | Metabolic                                                 |
| 6519   | ENSG00000138079 | 0.1058 | 0.6946  | 0.1523179 | multiple/Renal                                            |
| 6496   | ENSG00000138083 | 0.0387 | 0.4085  | 0.0947368 | Developmental                                             |
| 10128  | ENSG00000138095 | 0.1574 | 0.5858  | 0.2686924 | Neurological                                              |
| 1559   | ENSG00000138109 | 0.2322 | 0.7901  | 0.2938868 | Unclassified/Hematological                                |
| 5950   | ENSG00000138207 | 0.0781 | 0.7812  | 0.0999744 | Ophthalmological                                          |
| 8031   | ENSG00000138293 | 0.1147 | 0.4649  | 0.2467197 | Cancer                                                    |
| 22891  | ENSG00000138311 | 0.2631 | 1.0397  | 0.2530538 | Renal                                                     |
| 471    | ENSG00000138363 | 0.0476 | 0.6118  | 0.0778032 | Metabolic                                                 |
| 50485  | ENSG00000138375 | 0.1536 | 0.552   | 0.2782609 | Connective tissue                                         |
| 580    | ENSG00000138376 | 0.1827 | 0.4867  | 0.3753852 | Cancer                                                    |
| 2660   | ENSG00000138379 | 0.0182 | 0.3608  | 0.0504435 | Muscular                                                  |
| 1134   | ENSG00000138435 | 0.0301 | 0.5455  | 0.0551787 | Muscular                                                  |
| 30061  | ENSG00000138449 | 0.0498 | 0.4155  | 0.1198556 | Metabolic                                                 |
| 8483   | ENSG00000138615 | 0.0501 | 0.5616  | 0.0892094 | Skeletal                                                  |
| 55212  | ENSG00000138686 | 0.0422 | 0.5084  | 0.0830055 | multiple                                                  |
| 658    | ENSG00000138696 | 0.0082 | 0.558   | 0.0146953 | Skeletal                                                  |
| 5910   | ENSG00000138698 | 0.0258 | 0.4689  | 0.0550224 | Cancer                                                    |
| 80144  | ENSG00000138759 | 0.0823 | 0.5394  | 0.1525769 | multiple                                                  |
| 3033   | ENSG00000138796 | 0.0516 | 0.7449  | 0.069271  | Metabolic                                                 |
| 4547   | ENSG00000138823 | 0.0896 | 0.5839  | 0.1534509 | Metabolic                                                 |
| 2201   | ENSG00000138829 | 0.0174 | 0.6961  | 0.0249964 | Connective tissue                                         |
| 55605  | ENSG00000139116 | 0.0295 | 0.6782  | 0.0434975 | Ophthalmological                                          |
| 5830   | ENSG00000139197 | 0.0331 | 0.3967  | 0.0834384 | Neurological/multiple                                     |
| 1280   | ENSG00000139219 | 0.0287 | 0.3524  | 0.0814415 | Skeletal/Connective tissue/multiple/Ophthalmological/Bone |
| 121278 | ENSG00000139287 | 0.0298 | 0.5199  | 0.0573187 | Psychiatric                                               |
| 11081  | ENSG00000139330 | 0.0744 | 0.6458  | 0.1152059 | Ophthalmological                                          |



|        |                 |        |        |           |                                      |
|--------|-----------------|--------|--------|-----------|--------------------------------------|
| 50511  | ENSG00000139351 | 0.8094 | 1.4618 | 0.5537009 | Endocrine                            |
| 326625 | ENSG00000139428 | 0.3171 | 0.9288 | 0.3414083 | Metabolic                            |
| 3651   | ENSG00000139515 | 0.0605 | 0.9884 | 0.06121   | Endocrine/Gastrointestinal/Metabolic |
| 6821   | ENSG00000139531 | 0.0797 | 0.4252 | 0.1874412 | Metabolic                            |
| 50846  | ENSG00000139549 | 0.0166 | 0.6419 | 0.0258607 | Endocrine                            |
| 94     | ENSG00000139567 | 0.0569 | 0.7852 | 0.0724656 | Cardiovascular                       |
| 675    | ENSG00000139618 | 0.2814 | 0.6805 | 0.4135195 | multiple/Cancer                      |
| 5925   | ENSG00000139687 | 0.0444 | 0.4386 | 0.1012312 | Cancer                               |
| 145226 | ENSG00000139988 | 0.0713 | 0.6855 | 0.1040117 | Ophthalmological                     |
| 10516  | ENSG00000140092 | 0.0287 | 0.4772 | 0.0601425 | Connective tissue/Ophthalmological   |
| 51156  | ENSG00000140093 | 0.1781 | 0.7958 | 0.2237999 | Cardiovascular                       |
| 9990   | ENSG00000140199 | 0.0084 | 0.422  | 0.0199052 | Neurological                         |
| 50506  | ENSG00000140279 | 0.0783 | 0.6171 | 0.1268838 | Endocrine                            |
| 146059 | ENSG00000140326 | 0.0651 | 0.4191 | 0.1553329 | Hematological                        |
| 9051   | ENSG00000140368 | 0.0581 | 1.016  | 0.057185  | Dermatological                       |
| 2108   | ENSG00000140374 | 0.023  | 0.309  | 0.0744337 | Metabolic                            |
| 7168   | ENSG00000140416 | 0.0057 | 0.2211 | 0.0257802 | Cardiovascular                       |
| 3480   | ENSG00000140443 | 0.0194 | 0.6068 | 0.031971  | Developmental                        |
| 1583   | ENSG00000140459 | 0.1445 | 0.786  | 0.1838422 | Endocrine                            |
| 585    | ENSG00000140463 | 0.0545 | 0.3399 | 0.1603413 | multiple                             |
| 5371   | ENSG00000140464 | 0.1978 | 0.9145 | 0.2162931 | Cancer                               |
| 5428   | ENSG00000140521 | 0.0815 | 0.483  | 0.1687371 | Neurological/Ophthalmological        |
| 6017   | ENSG00000140522 | 0.0464 | 0.7264 | 0.0638767 | Ophthalmological                     |
| 5373   | ENSG00000140650 | 0.0419 | 0.5416 | 0.0773634 | Metabolic                            |
| 6524   | ENSG00000140675 | 0.0481 | 0.8886 | 0.0541301 | Renal                                |
| 91807  | ENSG00000140795 | 0.201  | 0.63   | 0.3190476 | Cardiovascular                       |
| 463    | ENSG00000140836 | 0.0237 | 0.441  | 0.0537415 | Cancer                               |
| 2653   | ENSG00000140905 | 0.1138 | 0.4004 | 0.2842158 | Metabolic                            |
| 2588   | ENSG00000141012 | 0.0854 | 0.7026 | 0.1215485 | Metabolic                            |
| 84916  | ENSG00000141076 | 0.051  | 0.4273 | 0.1193541 | Gastrointestinal                     |
| 4864   | ENSG00000141458 | 0.0805 | 0.6422 | 0.1253504 | Metabolic                            |
| 6563   | ENSG00000141469 | 0.1106 | 0.4953 | 0.223299  | Hematological                        |
| 7157   | ENSG00000141510 | 0.1316 | 0.5654 | 0.2327556 | Cancer                               |
| 11322  | ENSG00000141524 | 0.1359 | 1.2165 | 0.1117139 | Dermatological                       |
| 54808  | ENSG00000141627 | 0.0296 | 0.5859 | 0.0505206 | Skeletal/multiple                    |
| 4089   | ENSG00000141646 | 0.0067 | 0.3822 | 0.0175301 | Cancer                               |
| 8792   | ENSG00000141655 | 0.1938 | 0.5405 | 0.3585569 | Bone                                 |
| 2064   | ENSG00000141736 | 0.0642 | 0.5889 | 0.1090168 | Cancer                               |
| 773    | ENSG00000141837 | 0.0474 | 0.7899 | 0.0600076 | Neurological                         |
| 1291   | ENSG00000142156 | 0.0542 | 1.0364 | 0.0522964 | Muscular                             |
| 6647   | ENSG00000142168 | 0.1087 | 0.4609 | 0.2358429 | Endocrine/Neurological               |
| 1292   | ENSG00000142173 | 0.0469 | 0.8094 | 0.0579442 | Muscular                             |
| 351    | ENSG00000142192 | 0.0171 | 0.5283 | 0.032368  | Neurological/Psychiatric             |
| 81794  | ENSG00000142303 | 0.0285 | 0.7145 | 0.039888  | Connective tissue                    |
| 11132  | ENSG00000142330 | 0.1023 | 0.7717 | 0.1325645 | Endocrine                            |
| 5195   | ENSG00000142655 | 0.035  | 0.5257 | 0.0665779 | multiple                             |
| 3339   | ENSG00000142798 | 0.0723 | 0.7852 | 0.0920785 | Neurological/multiple                |
| 8915   | ENSG00000142867 | 0.0442 | 0.7906 | 0.0559069 | Cancer                               |
| 55811  | ENSG00000143199 | 0.151  | 0.5213 | 0.2896605 | Renal                                |
| 5498   | ENSG00000143224 | 0.0722 | 0.4224 | 0.170928  | Endocrine/Metabolic                  |
| 2212   | ENSG00000143226 | 0.3674 | 0.724  | 0.5074586 | Connective tissue                    |
| 6391   | ENSG00000143252 | 0.128  | 0.3827 | 0.3344656 | Cancer                               |
| 2165   | ENSG00000143278 | 0.1292 | 0.6861 | 0.1883107 | Hematological                        |
| 5546   | ENSG00000143294 | 0.0337 | 0.3671 | 0.0918006 | Cancer                               |
| 83872  | ENSG00000143341 | 0.0684 | 0.4884 | 0.1400491 | Ophthalmological                     |
| 1893   | ENSG00000143369 | 0.1926 | 0.4619 | 0.4169734 | Metabolic                            |
| 1513   | ENSG00000143387 | 0.0765 | 0.3931 | 0.194607  | Skeletal                             |
| 5993   | ENSG00000143390 | 0.1207 | 0.4409 | 0.2737582 | Immunological                        |
| 405    | ENSG00000143437 | 0.0421 | 0.3331 | 0.1263885 | Cancer                               |
| 7170   | ENSG00000143549 | 0.003  | 0.3785 | 0.007926  | Muscular                             |
| 5313   | ENSG00000143627 | 0.0463 | 0.596  | 0.0776846 | Hematological                        |
| 58     | ENSG00000143632 | 0.0012 | 1.1575 | 0.0010367 | Muscular                             |
| 1130   | ENSG00000143669 | 0.0788 | 0.4985 | 0.1580742 | multiple                             |
| 7044   | ENSG00000143768 | 0.11   | 1.0483 | 0.1049318 | Developmental                        |
| 5664   | ENSG00000143801 | 0.0178 | 0.7461 | 0.0238574 | Neurological                         |
| 3930   | ENSG00000143815 | 0.1198 | 0.7842 | 0.1527672 | Hematological/Skeletal               |
| 2052   | ENSG00000143819 | 0.0851 | 0.6896 | 0.1234049 | Gastrointestinal/Cardiovascular      |
| 5972   | ENSG00000143839 | 0.188  | 0.7258 | 0.2590245 | Renal/Cardiovascular                 |
| 64241  | ENSG00000143921 | 0.1038 | 0.8115 | 0.1279113 | Metabolic                            |
| 4867   | ENSG00000144061 | 0.1236 | 0.6609 | 0.1870177 | multiple/Renal                       |
| 1261   | ENSG00000144191 | 0.0847 | 0.7579 | 0.1117562 | Ophthalmological                     |
| 6323   | ENSG00000144285 | 0.0087 | 0.4823 | 0.0180386 | Neurological                         |
| 3329   | ENSG00000144381 | 0.0121 | 0.4686 | 0.0258216 | Neurological                         |
| 2177   | ENSG00000144554 | 0.162  | 0.5037 | 0.32162   | multiple                             |
| 185    | ENSG00000144891 | 0.0397 | 0.6855 | 0.0579139 | Renal/Cardiovascular                 |
| 4026   | ENSG00000145012 | 0.0588 | 0.5155 | 0.114064  | Cancer                               |
| 275    | ENSG00000145020 | 0.0691 | 0.5919 | 0.1167427 | Metabolic                            |
| 8893   | ENSG00000145191 | 0.0669 | 0.4326 | 0.1546463 | Neurological                         |
| 2638   | ENSG00000145321 | 0.1336 | 0.6129 | 0.2179801 | Endocrine                            |
| 6622   | ENSG00000145335 | 0.0315 | 0.3189 | 0.098777  | Neurological                         |
| 287    | ENSG00000145362 | 0.007  | 0.3804 | 0.0184017 | Cardiovascular                       |
| 285440 | ENSG00000145476 | 0.098  | 0.7144 | 0.1371781 | Ophthalmological                     |
| 4726   | ENSG00000145494 | 0.2097 | 1.1163 | 0.1878527 | multiple                             |

|        |                 |        |        |           |                                         |
|--------|-----------------|--------|--------|-----------|-----------------------------------------|
| 5921   | ENSG00000145715 | 0.021  | 0.3561 | 0.0589722 | multiple/Cancer/Cardiovascular          |
| 2741   | ENSG00000145888 | 0.0049 | 0.5598 | 0.0087531 | Hematological/Neurological              |
| 3779   | ENSG00000145936 | 0.0887 | 0.7428 | 0.119413  | Cardiovascular                          |
| 7941   | ENSG00000146070 | 0.2222 | 0.6753 | 0.3290389 | Hematological/Respiratory/Immunological |
| 4594   | ENSG00000146085 | 0.0252 | 0.5305 | 0.0475024 | Metabolic                               |
| 319100 | ENSG00000146383 | 0.0645 | 0.689  | 0.0936139 | Psychiatric                             |
| 1956   | ENSG00000146648 | 0.0508 | 0.7286 | 0.0697228 | Cancer                                  |
| 5723   | ENSG00000146733 | 0.0315 | 0.6255 | 0.0503597 | Metabolic                               |
| 6567   | ENSG00000147100 | 0.0277 | 0.4274 | 0.0648105 | Neurological                            |
| 10682  | ENSG00000147155 | 0.1463 | 0.6593 | 0.221902  | Connective tissue                       |
| 3561   | ENSG00000147168 | 0.3138 | 0.5749 | 0.5458341 | Immunological                           |
| 1730   | ENSG00000147202 | 0.0819 | 0.5773 | 0.1418673 | Renal                                   |
| 2719   | ENSG00000147257 | 0.0288 | 0.355  | 0.0811268 | multiple/Cancer                         |
| 79648  | ENSG00000147316 | 0.3091 | 0.671  | 0.4606557 | Neurological                            |
| 2652   | ENSG00000147380 | 0.1414 | 0.6139 | 0.2303307 | Ophthalmological                        |
| 50814  | ENSG00000147383 | 0.0743 | 0.536  | 0.1386194 | Developmental                           |
| 6770   | ENSG00000147465 | 0.0671 | 0.9408 | 0.0713223 | Endocrine                               |
| 54904  | ENSG00000147548 | 0.0441 | 0.4179 | 0.1055276 | Cancer                                  |
| 1807   | ENSG00000147647 | 0.0629 | 0.5154 | 0.1220411 | Metabolic                               |
| 55630  | ENSG00000147804 | 0.1856 | 0.9966 | 0.1862332 | Dermatological                          |
| 7436   | ENSG00000147852 | 0.02   | 0.3955 | 0.0505689 | Neurological                            |
| 4915   | ENSG00000148053 | 0.0303 | 0.5988 | 0.0506012 | Nutritional                             |
| 549    | ENSG00000148090 | 0.0435 | 0.6771 | 0.0642446 | Metabolic                               |
| 2934   | ENSG00000148180 | 0.041  | 0.5298 | 0.0773877 | Neurological                            |
| 210    | ENSG00000148218 | 0.0587 | 0.4449 | 0.1319398 | Metabolic                               |
| 6834   | ENSG00000148290 | 0.1363 | 0.728  | 0.1872253 | Neurological                            |
| 5995   | ENSG00000148604 | 0.109  | 0.7116 | 0.1531759 | Ophthalmological                        |
| 1586   | ENSG00000148795 | 0.2383 | 0.7341 | 0.3246152 | Endocrine                               |
| 7356   | ENSG00000149021 | 0.3064 | 0.8684 | 0.3528328 | Respiratory                             |
| 710    | ENSG00000149131 | 0.1856 | 0.6184 | 0.3001294 | Immunological                           |
| 5795   | ENSG00000149177 | 0.2421 | 0.7016 | 0.3450684 | Cancer                                  |
| 1813   | ENSG00000149295 | 0.0192 | 0.6159 | 0.0311739 | Neurological                            |
| 472    | ENSG00000149311 | 0.091  | 0.4971 | 0.1830618 | Cancer/Immunological                    |
| 3145   | ENSG00000149397 | 0.0491 | 0.4515 | 0.1087486 | Metabolic                               |
| 6094   | ENSG00000149489 | 0.0981 | 0.3786 | 0.2591125 | Ophthalmological                        |
| 2206   | ENSG00000149534 | 0.2634 | 0.4224 | 0.6235795 | Respiratory                             |
| 9638   | ENSG00000149557 | 0.023  | 0.4113 | 0.0559203 | Cancer                                  |
| 226    | ENSG00000149925 | 0.0315 | 0.6008 | 0.0524301 | Metabolic                               |
| 8091   | ENSG00000149948 | 0.3826 | 0.4907 | 0.7797025 | Cancer                                  |
| 4314   | ENSG00000149968 | 0.1392 | 0.4889 | 0.2847208 | Cardiovascular                          |
| 65217  | ENSG00000150275 | 0.0965 | 0.725  | 0.1331034 | multiple/Ear,Nose,Throat                |
| 2209   | ENSG00000150337 | 0.2552 | 0.6025 | 0.4235685 | Immunological                           |
| 3176   | ENSG00000150540 | 0.085  | 0.3965 | 0.2143758 | Respiratory                             |
| 5805   | ENSG00000150787 | 0.0981 | 0.5875 | 0.1669787 | Metabolic                               |
| 341640 | ENSG00000150893 | 0.0651 | 0.7106 | 0.0916127 | multiple                                |
| 2308   | ENSG00000150907 | 0.0493 | 0.4922 | 0.1001625 | Cancer                                  |
| 775    | ENSG00000151067 | 0.0314 | 0.5695 | 0.0551361 | multiple                                |
| 7068   | ENSG00000151090 | 0.0303 | 0.3554 | 0.085256  | Endocrine                               |
| 9231   | ENSG00000151208 | 0.0381 | 0.6443 | 0.0591339 | Gastrointestinal                        |
| 4143   | ENSG00000151224 | 0.0195 | 0.6052 | 0.0322208 | Metabolic                               |
| 2132   | ENSG00000151348 | 0.024  | 0.6111 | 0.0392734 | Bone                                    |
| 5860   | ENSG00000151552 | 0.0277 | 0.5122 | 0.0540804 | Metabolic                               |
| 166785 | ENSG00000151611 | 0.1214 | 0.5932 | 0.2046527 | Metabolic                               |
| 1909   | ENSG00000151617 | 0.0413 | 0.7981 | 0.0517479 | Neurological                            |
| 1646   | ENSG00000151632 | 0.225  | 0.7002 | 0.3213368 | Nutritional                             |
| 3758   | ENSG00000151704 | 0.036  | 0.516  | 0.0697674 | multiple                                |
| 291    | ENSG00000151729 | 0.0209 | 0.4194 | 0.0498331 | Ophthalmological                        |
| 2555   | ENSG00000151834 | 0.0114 | 0.4344 | 0.0262431 | Unclassified                            |
| 26278  | ENSG00000151835 | 0.0314 | 0.5278 | 0.0594922 | Neurological                            |
| 55835  | ENSG00000151849 | 0.1603 | 0.6364 | 0.2518856 | Neurological                            |
| 26353  | ENSG00000152137 | 0.0286 | 0.6201 | 0.0461216 | Neurological                            |
| 115761 | ENSG00000152213 | 0.0781 | 0.6655 | 0.1173554 | Cancer                                  |
| 5741   | ENSG00000152266 | 0.2026 | 0.5282 | 0.3835668 | Endocrine                               |
| 64421  | ENSG00000152457 | 0.1164 | 0.5895 | 0.1974555 | Immunological                           |
| 5213   | ENSG00000152556 | 0.0103 | 0.4757 | 0.0216523 | Metabolic                               |
| 1834   | ENSG00000152591 | 0.3174 | 0.8909 | 0.3562689 | Bone/Ear,Nose,Throat                    |
| 2697   | ENSG00000152661 | 0.0117 | 0.6946 | 0.0168442 | Skeletal/Cardiovascular                 |
| 51128  | ENSG00000152700 | 0.0048 | 0.4573 | 0.0104964 | Gastrointestinal                        |
| 5352   | ENSG00000152952 | 0.0524 | 0.506  | 0.1035573 | Unclassified                            |
| 3140   | ENSG00000153029 | 0.1426 | 0.4702 | 0.3032752 | Neurological                            |
| 10461  | ENSG00000153208 | 0.1095 | 0.5865 | 0.1867008 | Ophthalmological                        |
| 4929   | ENSG00000153234 | 0.0037 | 0.3129 | 0.0118249 | Neurological                            |
| 3621   | ENSG00000153487 | 0.1013 | 3.5337 | 0.0286668 | Cancer                                  |
| 925    | ENSG00000153563 | 0.4233 | 1.162  | 0.3642857 | Immunological                           |
| 22934  | ENSG00000153574 | 0.0473 | 0.3634 | 0.1301596 | Metabolic                               |
| 57338  | ENSG00000154118 | 0.0331 | 0.9038 | 0.0366231 | Neurological                            |
| 56172  | ENSG00000154122 | 0.0074 | 0.6032 | 0.0122679 | disorder/Bone                           |
| 64221  | ENSG00000154134 | 0.0805 | 0.5136 | 0.1567368 | Neurological                            |
| 5578   | ENSG00000154229 | 0.0027 | 0.4785 | 0.0056426 | Cancer                                  |
| 7345   | ENSG00000154277 | 0.1214 | 0.9316 | 0.1303134 | Neurological                            |
| 5506   | ENSG00000154415 | 0.2436 | 0.5197 | 0.468732  | Metabolic                               |
| 5651   | ENSG00000154646 | 0.1517 | 0.6179 | 0.245509  | Gastrointestinal                        |
| 7508   | ENSG00000154767 | 0.1515 | 0.6317 | 0.239829  | Dermatological                          |

|        |                                 |        |        |           |                                                           |
|--------|---------------------------------|--------|--------|-----------|-----------------------------------------------------------|
| 201163 | ENSG00000154803                 | 0.0361 | 0.761  | 0.0474376 | Respiratory/Cancer/Dermatological                         |
| 9056   | ENSG00000155465                 | 0.0487 | 0.4358 | 0.1117485 | Metabolic                                                 |
| 7273   | ENSG00000155657                 | 0.0377 | 0.5291 | 0.0712531 | Muscular/Cardiovascular                                   |
| 146183 | ENSG00000155719                 | 0.1353 | 0.539  | 0.2510204 | Ear,Nose,Throat                                           |
| 1836   | ENSG00000155850                 | 0.1108 | 0.4587 | 0.2415522 | Skeletal/Connective tissue/Bone                           |
| 2334   | ENSG00000155966                 | 0.0575 | 0.3678 | 0.156335  | Neurological                                              |
| 3798   | ENSG00000155980                 | 0.0085 | 0.596  | 0.0142617 | Neurological                                              |
| 10     | ENSG00000156006                 | 0.2392 | 0.6864 | 0.3484848 | Metabolic                                                 |
| 3778   | ENSG00000156113                 | 0.0076 | 0.3176 | 0.0239295 | Neurological                                              |
| 571    | ENSG00000156273                 | 0.1112 | 0.8019 | 0.1386707 | multiple/Cancer                                           |
| 7102   | ENSG00000156298                 | 0.2952 | 0.5138 | 0.5745426 | Neurological                                              |
| 6103   | ENSG00000156313                 | 0.3985 | 0.8012 | 0.4973789 | Ophthalmological                                          |
| 7381   | ENSG00000156467                 | 0.1032 | 0.4295 | 0.2402794 | multiple                                                  |
| 5521   | ENSG00000156475                 | 0.0388 | 0.3648 | 0.1063596 | Neurological                                              |
| 3098   | ENSG00000156515                 | 0.0478 | 0.7085 | 0.0674665 | Hematological                                             |
| 84295  | ENSG00000156531                 | 0.0107 | 0.3934 | 0.0271988 | multiple                                                  |
| 4838   | ENSG00000156574                 | 0.1117 | 0.7491 | 0.1491123 | Developmental                                             |
| 5261   | ENSG00000156873                 | 0.0354 | 0.3825 | 0.092549  | Metabolic                                                 |
| 7547   | ENSG00000156925                 | 0.0067 | 0.3786 | 0.0176968 | multiple                                                  |
| 701    | ENSG00000156970                 | 0.1363 | 0.6036 | 0.2258118 | Cancer                                                    |
| 51738  | ENSG00000157017                 | 0.0814 | 0.5332 | 0.1526632 | Nutritional                                               |
| 491    | ENSG00000157087                 | 0.0075 | 0.5598 | 0.0133976 | Ear,Nose,Throat                                           |
| 1376   | ENSG00000157184                 | 0.068  | 0.4855 | 0.1400618 | Muscular/Metabolic                                        |
| 22976  | ENSG00000157212                 | 0.0773 | 0.8836 | 0.087483  | Neurological                                              |
| 3815   | ENSG00000157404                 | 0.0976 | 0.609  | 0.1602627 | Dermatological/Cancer/Immunological                       |
| 673    | ENSG00000157764                 | 0.0223 | 0.3105 | 0.0718196 | Cancer                                                    |
| 176    | ENSG00000157766                 | 0.1342 | 0.4729 | 0.2837809 | Skeletal                                                  |
| 5192   | ENSG00000157911                 | 0.1056 | 1.1063 | 0.0954533 | Neurological/multiple                                     |
| 6757   | ENSG00000157950/ENSG00000241476 | 0.9822 | 0.922  | 1.0652928 | Cancer                                                    |
| 3242   | ENSG00000158104                 | 0.0532 | 0.785  | 0.0677707 | Skeletal/multiple/Ophthalmological/Bone/Metabolic         |
| 7498   | ENSG00000158125                 | 0.0575 | 0.6194 | 0.0928318 | Metabolic                                                 |
| 2176   | ENSG00000158169                 | 0.2185 | 0.4462 | 0.4896907 | multiple                                                  |
| 653361 | ENSG00000158517                 | 0.0936 | 1.3876 | 0.0674546 | Immunological                                             |
| 212    | ENSG00000158578                 | 0.0546 | 0.4424 | 0.1234177 | Hematological                                             |
| 7391   | ENSG00000158773                 | 0.0076 | 0.4611 | 0.0164823 | Metabolic                                                 |
| 1896   | ENSG00000158813                 | 0.0288 | 0.2745 | 0.104918  | Dermatological                                            |
| 65018  | ENSG00000158828                 | 0.1161 | 0.5981 | 0.1941147 | Neurological                                              |
| 4720   | ENSG00000158864                 | 0.0413 | 0.3856 | 0.1071058 | multiple                                                  |
| 336    | ENSG00000158874                 | 0.2911 | 0.5204 | 0.5593774 | Metabolic                                                 |
| 4359   | ENSG00000158887                 | 0.029  | 0.3527 | 0.0822229 | Neurological/multiple                                     |
| 2035   | ENSG00000159023                 | 0.0437 | 0.4467 | 0.0978285 | Hematological                                             |
| 79053  | ENSG00000159063                 | 0.0659 | 0.3965 | 0.1662043 | Metabolic                                                 |
| 3460   | ENSG00000159128                 | 0.3551 | 0.8487 | 0.4184046 | Immunological                                             |
| 714    | ENSG00000159189                 | 0.1503 | 1.0613 | 0.1416188 | Immunological                                             |
| 9992   | ENSG00000159197                 | 0.0728 | 1.324  | 0.0549849 | Cardiovascular                                            |
| 861    | ENSG00000159216                 | 0.016  | 0.4617 | 0.0346545 | Hematological/Connective tissue/Cancer                    |
| 2695   | ENSG00000159224                 | 0.1649 | 0.7834 | 0.2104927 | Cancer/Cardiovascular                                     |
| 23562  | ENSG00000159261                 | 0.032  | 1.5461 | 0.0206972 | Ear,Nose,Throat                                           |
| 3141   | ENSG00000159267                 | 0.1424 | 0.7909 | 0.180048  | Metabolic                                                 |
| 23569  | ENSG00000159339                 | 0.1477 | 0.8259 | 0.1788352 | Connective tissue                                         |
| 8659   | ENSG00000159423                 | 0.0407 | 0.7991 | 0.0509323 | Metabolic                                                 |
| 1636   | ENSG00000159640                 | 0.0877 | 0.705  | 0.1243972 | Endocrine/Neurological/Immunological/Renal/Cardiovascular |
| 181    | ENSG00000159723                 | 0.1168 | 0.5422 | 0.2154187 | Nutritional                                               |
| 4882   | ENSG00000159899                 | 0.0063 | 0.3339 | 0.0188679 | Skeletal                                                  |
| 10020  | ENSG00000159921                 | 0.0158 | 0.6664 | 0.0237095 | Muscular/Metabolic                                        |
| 64699  | ENSG00000160183                 | 0.0639 | 0.7894 | 0.0809476 | Ear,Nose,Throat                                           |
| 875    | ENSG00000160200                 | 0.0813 | 1.1292 | 0.0719979 | Hematological/Metabolic                                   |
| 1409   | ENSG00000160202                 | 0.0271 | 0.9521 | 0.0284634 | Ophthalmological                                          |
| 2539   | ENSG00000160211                 | 0.0667 | 0.9138 | 0.0729919 | Hematological/Metabolic                                   |
| 1476   | ENSG00000160213                 | 0.1353 | 1.7939 | 0.0754223 | Neurological                                              |
| 326    | ENSG00000160224                 | 0.1908 | 0.8942 | 0.2133751 | Immunological                                             |
| 3689   | ENSG00000160255                 | 0.3148 | 1.2507 | 0.251699  | Immunological                                             |
| 10841  | ENSG00000160282                 | 0.1249 | 1.4562 | 0.0857712 | Metabolic                                                 |
| 11093  | ENSG00000160323                 | 0.1969 | 0.7681 | 0.2563468 | Hematological                                             |
| 917    | ENSG00000160654                 | 0.1881 | 0.4633 | 0.4060004 | Immunological                                             |
| 103    | ENSG00000160710                 | 0.1275 | 0.5639 | 0.2261039 | Dermatological                                            |
| 1141   | ENSG00000160716                 | 0.0285 | 0.8472 | 0.0336402 | Neurological                                              |
| 4000   | ENSG00000160789                 | 0.0134 | 0.6991 | 0.0191675 | Metabolic/Muscular/Cardiovascular                         |
| 1234   | ENSG00000160791                 | 0.1673 | 0.7129 | 0.2346753 | Immunological                                             |
| 5745   | ENSG00000160801                 | 0.0911 | 0.7862 | 0.1158738 | Connective tissue/Cancer                                  |
| 4634   | ENSG00000160808                 | 0.0312 | 0.5892 | 0.0529532 | Cardiovascular                                            |
| 2264   | ENSG00000160867                 | 0.0682 | 0.7682 | 0.088779  | Cancer                                                    |
| 9401   | ENSG00000160957                 | 0.2349 | 0.8686 | 0.2704352 | multiple                                                  |
| 8878   | ENSG00000161011                 | 0.046  | 0.5678 | 0.0810144 | Bone                                                      |
| 4868   | ENSG00000161270                 | 0.1001 | 0.6479 | 0.1544992 | Renal                                                     |
| 6352   | ENSG00000161570                 | 0.1016 | 0.496  | 0.2048387 | Immunological                                             |
| 3060   | ENSG00000161610                 | 0.1094 | 0.9232 | 0.1185009 | Psychiatric                                               |
| 162417 | ENSG00000161653                 | 0.0724 | 0.984  | 0.0735772 | Metabolic                                                 |
| 6755   | ENSG00000162009                 | 0.1092 | 1.999  | 0.0546273 | Endocrine                                                 |
| 4041   | ENSG00000162337                 | 0.0278 | 1.2138 | 0.0229033 | Unclassified/Ophthalmological/Bone                        |
| 6886   | ENSG00000162367                 | 0.0311 | 0.5662 | 0.0549276 | Cancer                                                    |
| 7809   | ENSG00000162399                 | 0.1658 | 1.0504 | 0.1578446 | multiple                                                  |
| 249    | ENSG00000162551                 | 0.0569 | 0.9249 | 0.0615202 | Bone/Metabolic                                            |

|        |                 |        |        |           |                                                            |
|--------|-----------------|--------|--------|-----------|------------------------------------------------------------|
| 54361  | ENSG00000162552 | 0.0048 | 0.8135 | 0.0059004 | Developmental                                              |
| 178    | ENSG00000162688 | 0.0409 | 0.6401 | 0.0638963 | Metabolic                                                  |
| 114548 | ENSG00000162711 | 0.1004 | 0.8725 | 0.1150716 | multiple/Immunological                                     |
| 5824   | ENSG00000162735 | 0.0533 | 0.5782 | 0.0921826 | multiple                                                   |
| 5194   | ENSG00000162928 | 0.0454 | 0.3829 | 0.1185688 | Neurological/multiple                                      |
| 27185  | ENSG00000162946 | 0.4223 | 0.72   | 0.5865278 | Psychiatric                                                |
| 4760   | ENSG00000162992 | 0.0101 | 0.4721 | 0.0213938 | Endocrine                                                  |
| 2487   | ENSG00000162998 | 0.0386 | 0.4044 | 0.09545   | Connective tissue                                          |
| 6443   | ENSG00000163069 | 0.0361 | 1.145  | 0.0315284 | Muscular                                                   |
| 129880 | ENSG00000163093 | 0.0553 | 0.8054 | 0.0686615 | multiple                                                   |
| 4487   | ENSG00000163132 | 0.0303 | 0.6767 | 0.0447761 | Developmental/Skeletal                                     |
| 2071   | ENSG00000163161 | 0.0206 | 0.6995 | 0.0294496 | Dermatological                                             |
| 1420   | ENSG00000163254 | 0.0732 | 1.3263 | 0.0551911 | Ophthalmological                                           |
| 118429 | ENSG00000163297 | 0.1046 | 0.5794 | 0.1805316 | Connective tissue/multiple                                 |
| 9076   | ENSG00000163347 | 0.0491 | 0.4211 | 0.1165994 | multiple                                                   |
| 1293   | ENSG00000163359 | 0.0868 | 0.6746 | 0.1286688 | Muscular                                                   |
| 3549   | ENSG00000163501 | 0.0228 | 0.6037 | 0.0377671 | Skeletal                                                   |
| 7048   | ENSG00000163513 | 0.0422 | 0.6972 | 0.0605278 | Connective tissue/Cancer                                   |
| 5274   | ENSG00000163536 | 0.0682 | 0.6405 | 0.1064793 | Neurological                                               |
| 6708   | ENSG00000163554 | 0.1156 | 0.649  | 0.1781202 | Hematological                                              |
| 6514   | ENSG00000163581 | 0.1101 | 0.596  | 0.1847315 | Endocrine/Metabolic                                        |
| 1493   | ENSG00000163599 | 0.1687 | 0.4855 | 0.3474768 | Endocrine                                                  |
| 29851  | ENSG00000163600 | 0.2058 | 0.628  | 0.3277707 | Immunological                                              |
| 1040   | ENSG00000163624 | 0.0208 | 0.6762 | 0.0307601 | Cancer                                                     |
| 213    | ENSG00000163631 | 0.1775 | 0.8288 | 0.2141651 | Hematological                                              |
| 6314   | ENSG00000163635 | 0.0789 | 0.3328 | 0.2370793 | Neurological                                               |
| 7401   | ENSG00000163646 | 0.0627 | 0.5197 | 0.1206465 | multiple                                                   |
| 8820   | ENSG00000163666 | 0.1155 | 0.5034 | 0.2294398 | Endocrine/multiple                                         |
| 323    | ENSG00000163697 | 0.0375 | 0.4488 | 0.0835561 | Neurological                                               |
| 78987  | ENSG00000163703 | 0.1238 | 0.5919 | 0.209157  | Cardiovascular                                             |
| 84343  | ENSG00000163755 | 0.1063 | 0.455  | 0.2336264 | multiple                                                   |
| 6010   | ENSG00000163914 | 0.024  | 1.1858 | 0.0202395 | Ophthalmological                                           |
| 7086   | ENSG00000163931 | 0.0265 | 0.8431 | 0.0314316 | Metabolic                                                  |
| 5308   | ENSG00000164093 | 0.0094 | 0.4989 | 0.0188415 | multiple/Ophthalmological                                  |
| 8492   | ENSG00000164099 | 0.1019 | 0.5446 | 0.1871098 | Neurological                                               |
| 4338   | ENSG00000164172 | 0.1005 | 0.5043 | 0.1992861 | Metabolic                                                  |
| 51151  | ENSG00000164175 | 0.1075 | 0.533  | 0.2016886 | Ophthalmological/Dermatological                            |
| 25836  | ENSG00000164190 | 0.1046 | 0.338  | 0.0431953 | Developmental                                              |
| 84059  | ENSG00000164199 | 0.1136 | 0.5555 | 0.2045005 | Neurological/multiple                                      |
| 4724   | ENSG00000164258 | 0.0574 | 0.3589 | 0.1599331 | Neurological/multiple                                      |
| 117156 | ENSG00000164265 | 0.2792 | 0.7841 | 0.356077  | Respiratory                                                |
| 6690   | ENSG00000164266 | 0.2283 | 0.7284 | 0.3134267 | Gastrointestinal                                           |
| 3818   | ENSG00000164344 | 0.1579 | 0.6687 | 0.2361298 | Hematological                                              |
| 7015   | ENSG00000164362 | 0.2543 | 1.4706 | 0.1729226 | Hematological                                              |
| 23305  | ENSG00000164398 | 0.0585 | 0.4443 | 0.1316678 | Cancer/Muscular                                            |
| 6100   | ENSG00000164610 | 0.0331 | 0.7387 | 0.0448084 | Ophthalmological                                           |
| 6469   | ENSG00000164690 | 0.0345 | 0.7985 | 0.043206  | Developmental/Ophthalmological/Skeletal                    |
| 1278   | ENSG00000164692 | 0.0645 | 0.3923 | 0.164415  | Connective tissue/Bone                                     |
| 5224   | ENSG00000164708 | 0.04   | 1.0003 | 0.039988  | Muscular                                                   |
| 10395  | ENSG00000164741 | 0.0487 | 0.7514 | 0.0648124 | Cancer                                                     |
| 5828   | ENSG00000164751 | 0.0652 | 0.4758 | 0.1370324 | Neurological/multiple                                      |
| 4982   | ENSG00000164761 | 0.0723 | 0.6583 | 0.1098283 | Bone                                                       |
| 19     | ENSG00000165029 | 0.0242 | 0.5052 | 0.0479018 | Neurological/Metabolic/Cardiovascular                      |
| 2395   | ENSG00000165060 | 0.1869 | 0.9165 | 0.203928  | Neurological                                               |
| 117531 | ENSG00000165091 | 0.0208 | 0.6598 | 0.0315247 | Ear,Nose,Throat                                            |
| 2203   | ENSG00000165140 | 0.0797 | 0.7573 | 0.1052423 | Metabolic                                                  |
| 1536   | ENSG00000165168 | 0.0425 | 0.5156 | 0.0824282 | Immunological                                              |
| 5277   | ENSG00000165195 | 0.0692 | 0.3562 | 0.1942729 | Hematological                                              |
| 538    | ENSG00000165240 | 0.0517 | 0.4087 | 0.1264987 | Neurological/Connective tissue/multiple                    |
| 360    | ENSG00000165272 | 0.0237 | 0.644  | 0.0368012 | Hematological                                              |
| 7415   | ENSG00000165280 | 0.0004 | 0.4043 | 0.0009894 | Muscular                                                   |
| 7486   | ENSG00000165392 | 0.1757 | 0.5336 | 0.3292729 | multiple                                                   |
| 7253   | ENSG00000165409 | 0.0695 | 0.5042 | 0.1378421 | Endocrine/Cancer                                           |
| 401    | ENSG00000165462 | 0.0075 | 0.7175 | 0.010453  | Ophthalmological                                           |
| 4153   | ENSG00000165471 | 0.291  | 0.6222 | 0.4676953 | Immunological                                              |
| 2706   | ENSG00000165474 | 0.0337 | 0.8719 | 0.0386512 | multiple/Ear,Nose,Throat/Dermatological                    |
| 123016 | ENSG00000165533 | 0.022  | 0.4909 | 0.0448156 | multiple                                                   |
| 64324  | ENSG00000165671 | 0.0862 | 0.3999 | 0.2155539 | Developmental/multiple                                     |
| 7248   | ENSG00000165699 | 0.0684 | 0.4632 | 0.1476684 | Developmental/Respiratory/multiple/Renal                   |
| 3251   | ENSG00000165704 | 0.0249 | 0.2855 | 0.0872154 | Metabolic                                                  |
| 219736 | ENSG00000165730 | 0.299  | 0.6972 | 0.4288583 | Cardiovascular                                             |
| 5979   | ENSG00000165731 | 0.0942 | 0.7386 | 0.1275386 | Gastrointestinal/Respiratory/Cancer                        |
| 26012  | ENSG00000165802 | 0.0261 | 0.609  | 0.0428571 | Endocrine                                                  |
| 1557   | ENSG00000165841 | 0.2267 | 0.8291 | 0.273429  | Metabolic                                                  |
| 5913   | ENSG00000165917 | 0.0164 | 1.0908 | 0.0150348 | Muscular                                                   |
| 3990   | ENSG00000166035 | 0.1513 | 0.6468 | 0.2339208 | Metabolic                                                  |
| 81693  | ENSG00000166126 | 0.2119 | 1.0214 | 0.2074603 | Hematological/Neurological/Metabolic                       |
| 2200   | ENSG00000166147 | 0.0179 | 0.58   | 0.0308621 | Connective tissue/multiple/Ophthalmological/Cardiovascular |
| 2652   | ENSG00000166160 | 0.1415 | 0.605  | 0.2338843 | Ophthalmological                                           |
| 79803  | ENSG00000166189 | 0.1104 | 0.5142 | 0.2147025 | multiple                                                   |
| 2562   | ENSG00000166206 | 0.0449 | 0.4418 | 0.1016297 | Psychiatric                                                |
| 5092   | ENSG00000166228 | 0.0043 | 0.5169 | 0.0083188 | Metabolic                                                  |
| 6609   | ENSG00000166311 | 0.1044 | 0.5493 | 0.1900601 | Metabolic                                                  |

|        |                 |        |        |           |                                                        |
|--------|-----------------|--------|--------|-----------|--------------------------------------------------------|
| 1200   | ENSG00000166340 | 0.0637 | 0.4385 | 0.145268  | Neurological                                           |
| 1528   | ENSG00000166347 | 0.0636 | 0.5483 | 0.1159949 | Hematological                                          |
| 5896   | ENSG00000166349 | 0.0495 | 0.5961 | 0.0830398 | Immunological                                          |
| 7084   | ENSG00000166548 | 0.1063 | 0.5703 | 0.1863931 | Muscular                                               |
| 4160   | ENSG00000166603 | 0.0276 | 0.5442 | 0.0507166 | Nutritional                                            |
| 6340   | ENSG00000166828 | 0.0743 | 0.7498 | 0.0990931 | Endocrine/Renal                                        |
| 4640   | ENSG00000166866 | 0.0658 | 0.5908 | 0.1113744 | Ear,Nose,Throat                                        |
| 2038   | ENSG00000166947 | 0.1688 | 0.5456 | 0.3093842 | Hematological                                          |
| 5245   | ENSG00000167085 | 0.0017 | 0.4479 | 0.0037955 | Cancer                                                 |
| 64127  | ENSG00000167207 | 0.1241 | 0.7045 | 0.1761533 | Gastrointestinal/multiple/Immunological/Dermatological |
| 3481   | ENSG00000167244 | 0.1168 | 0.5064 | 0.2306477 | Developmental                                          |
| 915    | ENSG00000167286 | 0.2544 | 0.4849 | 0.5246443 | Immunological                                          |
| 79001  | ENSG00000167397 | 0.0823 | 0.7263 | 0.1133141 | Hematological                                          |
| 762    | ENSG00000167434 | 0.3467 | 1.0117 | 0.3426905 | Ophthalmological                                       |
| 359    | ENSG00000167580 | 0.0604 | 0.5458 | 0.1106632 | Endocrine                                              |
| 3811   | ENSG00000167633 | 0.4701 | 0.6753 | 0.6961351 | Immunological                                          |
| 85300  | ENSG00000167654 | 0.048  | 1.3574 | 0.0353617 | Neurological                                           |
| 5345   | ENSG00000167711 | 0.1547 | 0.5827 | 0.2654882 | Hematological                                          |
| 3816   | ENSG00000167748 | 0.3696 | 1.0839 | 0.3409909 | Renal                                                  |
| 9622   | ENSG00000167749 | 0.2039 | 1.0106 | 0.2017613 | Bone                                                   |
| 3848   | ENSG00000167768 | 0.1488 | 0.823  | 0.1808019 | Dermatological                                         |
| 4723   | ENSG00000167792 | 0.0195 | 0.4797 | 0.0406504 | Neurological/multiple                                  |
| 147138 | ENSG00000167895 | 0.1166 | 0.943  | 0.1236479 | Dermatological                                         |
| 50964  | ENSG00000167941 | 0.0561 | 0.7497 | 0.0748299 | Skeletal                                               |
| 21     | ENSG00000167972 | 0.0633 | 0.9451 | 0.066977  | Respiratory                                            |
| 7439   | ENSG00000167995 | 0.2291 | 0.7078 | 0.323679  | Ophthalmological                                       |
| 26580  | ENSG00000168000 | 0.0517 | 0.5117 | 0.1010358 | Neurological/Muscular/Metabolic                        |
| 1499   | ENSG00000168036 | 0.0006 | 0.4516 | 0.0013286 | Cancer                                                 |
| 7536   | ENSG00000168066 | 0.0281 | 0.3495 | 0.0804006 | Endocrine/Unclassified                                 |
| 5729   | ENSG00000168229 | 0.1598 | 0.919  | 0.1738847 | Respiratory                                            |
| 256297 | ENSG00000168267 | 0.0426 | 0.9515 | 0.0447714 | Endocrine                                              |
| 4247   | ENSG00000168282 | 0.0583 | 0.3888 | 0.1499486 | Metabolic                                              |
| 5162   | ENSG00000168291 | 0.0313 | 0.4852 | 0.0645095 | Metabolic                                              |
| 136647 | ENSG00000168303 | 0.0597 | 0.1687 | 0.3538826 | Dermatological                                         |
| 1524   | ENSG00000168329 | 0.1001 | 1.1894 | 0.0841601 | Immunological                                          |
| 91949  | ENSG00000168434 | 0.037  | 0.5566 | 0.066475  | Metabolic                                              |
| 6338   | ENSG00000168447 | 0.0817 | 0.8924 | 0.0915509 | Endocrine/Renal                                        |
| 55806  | ENSG00000168453 | 0.1217 | 0.553  | 0.2200723 | Dermatological                                         |
| 7148   | ENSG00000168477 | 0.1179 | 0.8024 | 0.1469342 | Connective tissue                                      |
| 6440   | ENSG00000168484 | 0.1026 | 0.8422 | 0.1218238 | Respiratory                                            |
| 148738 | ENSG00000168509 | 0.0621 | 0.6096 | 0.1018701 | Metabolic                                              |
| 1281   | ENSG00000168542 | 0.0574 | 0.4193 | 0.1368948 | Unclassified/Connective tissue                         |
| 2668   | ENSG00000168621 | 0.0772 | 0.3847 | 0.2006759 | Gastrointestinal/Respiratory                           |
| 8313   | ENSG00000168646 | 0.0479 | 0.6383 | 0.0750431 | Cancer                                                 |
| 3575   | ENSG00000168685 | 0.2464 | 0.6141 | 0.4012376 | Immunological                                          |
| 85476  | ENSG00000168827 | 0.049  | 0.6117 | 0.0801046 | multiple                                               |
| 6439   | ENSG00000168878 | 0.1694 | 0.6084 | 0.2784352 | Respiratory                                            |
| 1285   | ENSG00000169031 | 0.1395 | 0.5048 | 0.2763471 | Renal                                                  |
| 3667   | ENSG00000169047 | 0.0527 | 0.6157 | 0.0855936 | Endocrine                                              |
| 4204   | ENSG00000169057 | 0.0231 | 0.3557 | 0.0649424 | Developmental/Neurological/Psychiatric                 |
| 4920   | ENSG00000169071 | 0.0367 | 0.7896 | 0.0464792 | Skeletal/multiple                                      |
| 367    | ENSG00000169083 | 0.0576 | 0.4106 | 0.1402825 | Endocrine/Muscular/Cancer                              |
| 255738 | ENSG00000169174 | 0.1356 | 0.764  | 0.1774869 | Metabolic                                              |
| 4330   | ENSG00000169184 | 0.0443 | 0.7979 | 0.0555207 | Cancer                                                 |
| 3596   | ENSG00000169194 | 0.2728 | 0.8421 | 0.323952  | Respiratory/Immunological                              |
| 154    | ENSG00000169252 | 0.0656 | 0.6279 | 0.1044752 | Unclassified/Respiratory/Nutritional                   |
| 8706   | ENSG00000169255 | 0.0317 | 0.504  | 0.0628968 | Hematological                                          |
| 190    | ENSG00000169297 | 0.2124 | 0.8887 | 0.2390008 | Endocrine/Neurological/multiple                        |
| 11141  | ENSG00000169306 | 0.0066 | 0.3532 | 0.0186863 | Neurological                                           |
| 64805  | ENSG00000169313 | 0.0793 | 0.7878 | 0.1006601 | Hematological                                          |
| 7369   | ENSG00000169344 | 0.1326 | 0.8631 | 0.1536323 | Renal                                                  |
| 6335   | ENSG00000169432 | 0.0354 | 0.6055 | 0.0584641 | Neurological                                           |
| 9839   | ENSG00000169554 | 0.0168 | 0.2883 | 0.0582726 | Developmental                                          |
| 2705   | ENSG00000169562 | 0.0062 | 0.4595 | 0.0134929 | Neurological                                           |
| 1816   | ENSG00000169676 | 0.0803 | 1.1288 | 0.0711375 | Neurological/Ophthalmological/Psychiatric              |
| 699    | ENSG00000169679 | 0.1552 | 0.4308 | 0.36026   | Cancer                                                 |
| 10555  | ENSG00000169692 | 0.1227 | 1.2903 | 0.0950942 | Metabolic                                              |
| 2815   | ENSG00000169704 | 0.1994 | 1.1638 | 0.1713353 | Hematological                                          |
| 686    | ENSG00000169814 | 0.0904 | 0.6289 | 0.143743  | Metabolic                                              |
| 2990   | ENSG00000169919 | 0.1486 | 0.8754 | 0.169751  | Metabolic                                              |
| 23414  | ENSG00000169946 | 0.0292 | 0.463  | 0.063067  | Cardiovascular                                         |
| 123606 | ENSG00000170113 | 0.0072 | 0.514  | 0.0140078 | Neurological                                           |
| 2993   | ENSG00000170180 | 0.9346 | 1.5644 | 0.5974175 | Hematological                                          |
| 56246  | ENSG00000170262 | 0.2093 | 0.6959 | 0.3007616 | Endocrine                                              |
| 2720   | ENSG00000170266 | 0.1532 | 0.5899 | 0.259705  | Metabolic                                              |
| 54714  | ENSG00000170289 | 0.1946 | 0.4619 | 0.4213033 | Ophthalmological                                       |
| 4086   | ENSG00000170365 | 0.0039 | 0.6274 | 0.0062161 | Neurological/Muscular                                  |
| 3856   | ENSG00000170421 | 0.0391 | 0.984  | 0.0397358 | Gastrointestinal                                       |
| 3851   | ENSG00000170477 | 0.0944 | 0.8431 | 0.1119677 | Connective tissue                                      |
| 375611 | ENSG00000170615 | 0.0271 | 0.5206 | 0.0520553 | Ear,Nose,Throat                                        |
| 6444   | ENSG00000170624 | 0.0273 | 0.347  | 0.0786744 | Muscular/Cardiovascular                                |
| 5429   | ENSG00000170734 | 0.1144 | 0.4458 | 0.2566173 | Dermatological                                         |
| 8419   | ENSG00000170819 | 0.0896 | 0.5858 | 0.1529532 | Ophthalmological                                       |

|        |                 |        |        |           |                                      |
|--------|-----------------|--------|--------|-----------|--------------------------------------|
| 2492   | ENSG00000170820 | 0.0675 | 0.4633 | 0.1456939 | Endocrine/Unclassified/Cancer        |
| 8493   | ENSG00000170836 | 0.0525 | 0.4595 | 0.1142546 | Cancer                               |
| 5314   | ENSG00000170927 | 0.174  | 0.5036 | 0.3455123 | Renal                                |
| 4534   | ENSG00000171100 | 0.04   | 0.4603 | 0.0868998 | Muscular                             |
| 3643   | ENSG00000171105 | 0.0227 | 0.7577 | 0.0299591 | Endocrine/Developmental/multiple     |
| 4902   | ENSG00000171119 | 0.0633 | 1.7471 | 0.0362315 | Gastrointestinal                     |
| 136541 | ENSG00000171147 | 0.236  | 0.5403 | 0.4367944 | Gastrointestinal                     |
| 2548   | ENSG00000171298 | 0.1074 | 1.0982 | 0.0977964 | Metabolic                            |
| 55636  | ENSG00000171316 | 0.0242 | 0.4076 | 0.0593719 | multiple                             |
| 157570 | ENSG00000171320 | 0.175  | 0.4856 | 0.3603789 | Developmental                        |
| 1184   | ENSG00000171365 | 0.0147 | 0.3588 | 0.0409699 | Renal/Metabolic                      |
| 3860   | ENSG00000171401 | 0.0854 | 0.5549 | 0.1539016 | Connective tissue                    |
| 3857   | ENSG00000171403 | 0.2173 | 0.6613 | 0.3285952 | Dermatological                       |
| 9      | ENSG00000171428 | 0.2313 | 0.6892 | 0.3356065 | Cardiovascular                       |
| 4163   | ENSG00000171444 | 0.0203 | 0.7008 | 0.0289669 | Cancer                               |
| 2110   | ENSG00000171503 | 0.0365 | 0.4742 | 0.0769717 | Metabolic                            |
| 2266   | ENSG00000171557 | 0.0969 | 0.7168 | 0.1351842 | Hematological                        |
| 2243   | ENSG00000171560 | 0.0348 | 0.5438 | 0.0639941 | Hematological/Neurological           |
| 2244   | ENSG00000171564 | 0.0927 | 0.6658 | 0.139231  | Hematological                        |
| 203859 | ENSG00000171714 | 0.1138 | 0.8233 | 0.1382242 | Bone                                 |
| 5053   | ENSG00000171759 | 0.0415 | 0.5502 | 0.0754271 | Metabolic                            |
| 2628   | ENSG00000171766 | 0.0232 | 0.3587 | 0.064678  | Metabolic                            |
| 596    | ENSG00000171791 | 0.0463 | 0.4932 | 0.0938767 | Cancer                               |
| 1296   | ENSG00000171812 | 0.0349 | 0.3821 | 0.0913373 | Ophthalmological                     |
| 5728   | ENSG00000171862 | 0.0011 | 0.1824 | 0.0060307 | Unclassified/multiple/Cancer         |
| 5621   | ENSG00000171867 | 0.055  | 0.7682 | 0.0715959 | Neurological/Psychiatric             |
| 91647  | ENSG00000171953 | 0.0684 | 0.5148 | 0.1328671 | multiple                             |
| 4118   | ENSG00000172005 | 0.072  | 0.5439 | 0.1323773 | Cancer                               |
| 3913   | ENSG00000172037 | 0.0629 | 0.4912 | 0.1280537 | Ophthalmological                     |
| 6606   | ENSG00000172062 | 0.0769 | 0.544  | 0.1413603 | Muscular                             |
| 9451   | ENSG00000172071 | 0.0669 | 0.7894 | 0.0847479 | Bone                                 |
| 10892  | ENSG00000172175 | 0.0609 | 0.4843 | 0.1257485 | Cancer                               |
| 1798   | ENSG00000172269 | 0.0334 | 0.4128 | 0.0809109 | Metabolic                            |
| 682    | ENSG00000172270 | 0.2229 | 1.6011 | 0.1392168 | Hematological                        |
| 669    | ENSG00000172331 | 0.0379 | 0.5426 | 0.0698489 | Hematological                        |
| 189    | ENSG00000172482 | 0.1428 | 1.2668 | 0.112725  | Metabolic                            |
| 9420   | ENSG00000172817 | 0.222  | 0.6194 | 0.3584114 | Gastrointestinal                     |
| 3849   | ENSG00000172867 | 0.1534 | 0.7787 | 0.196995  | Dermatological                       |
| 1717   | ENSG00000172893 | 0.0544 | 1.0209 | 0.0532863 | multiple                             |
| 132884 | ENSG00000173040 | 0.1926 | 0.9682 | 0.1989258 | Skeletal                             |
| 9657   | ENSG00000173226 | 0.066  | 0.3191 | 0.2068317 | Renal                                |
| 713    | ENSG00000173369 | 0.1367 | 0.9083 | 0.1505009 | Immunological                        |
| 4973   | ENSG00000173391 | 0.2719 | 0.6084 | 0.4469099 | Cardiovascular                       |
| 5091   | ENSG00000173599 | 0.0151 | 0.6994 | 0.0215899 | Metabolic                            |
| 6777   | ENSG00000173757 | 0.015  | 0.5761 | 0.0260371 | Endocrine/Cancer                     |
| 3728   | ENSG00000173801 | 0.0068 | 0.9569 | 0.0071063 | multiple                             |
| 10276  | ENSG00000173848 | 0.071  | 0.5249 | 0.1352639 | Cardiovascular                       |
| 8557   | ENSG00000173991 | 0.0462 | 1.2211 | 0.0378347 | Muscular/Cardiovascular              |
| 23592  | ENSG00000174106 | 0.0773 | 0.4451 | 0.1736688 | Developmental/multiple/Bone          |
| 6403   | ENSG00000174175 | 0.1684 | 0.6421 | 0.2622644 | Immunological                        |
| 10594  | ENSG00000174231 | 0.0005 | 0.5303 | 0.0009429 | Ophthalmological                     |
| 340024 | ENSG00000174358 | 0.0705 | 1.2725 | 0.0554028 | Metabolic                            |
| 3981   | ENSG00000174405 | 0.0712 | 0.9181 | 0.0775515 | multiple/Cancer                      |
| 7201   | ENSG00000174417 | 0.0279 | 0.4026 | 0.0692996 | Endocrine                            |
| 488    | ENSG00000174437 | 0.0055 | 0.452  | 0.0121681 | Dermatological                       |
| 582    | ENSG00000174483 | 0.0365 | 0.6172 | 0.059138  | multiple                             |
| 3952   | ENSG00000174697 | 0.1059 | 0.6389 | 0.1657536 | Nutritional                          |
| 8322   | ENSG00000174804 | 0.0145 | 0.3243 | 0.0447117 | Ophthalmological                     |
| 11146  | ENSG00000174842 | 0.0802 | 0.4234 | 0.189419  | Cardiovascular                       |
| 2523   | ENSG00000174951 | 0.1526 | 1.0784 | 0.1415059 | Hematological                        |
| 545    | ENSG00000175054 | 0.0485 | 0.4178 | 0.1160843 | Developmental                        |
| 147409 | ENSG00000175065 | 0.11   | 0.6257 | 0.1758031 | Dermatological                       |
| 1674   | ENSG00000175084 | 0.0099 | 0.6349 | 0.015593  | Muscular/Cardiovascular              |
| 5897   | ENSG00000175097 | 0.0578 | 0.4694 | 0.1231359 | Immunological                        |
| 1649   | ENSG00000175197 | 0.0554 | 0.429  | 0.1291375 | Cancer                               |
| 5095   | ENSG00000175198 | 0.0574 | 0.4767 | 0.1204112 | Metabolic                            |
| 5626   | ENSG00000175325 | 0.1675 | 0.5961 | 0.2809931 | Endocrine                            |
| 5122   | ENSG00000175426 | 0.0375 | 0.4539 | 0.0826173 | Nutritional                          |
| 4023   | ENSG00000175445 | 0.0388 | 0.5086 | 0.0762878 | Metabolic                            |
| 10008  | ENSG00000175538 | 0.0365 | 0.6262 | 0.0582881 | Renal                                |
| 7352   | ENSG00000175564 | 0.0698 | 0.6399 | 0.1090795 | Nutritional                          |
| 7351   | ENSG00000175567 | 0.0229 | 0.4565 | 0.0501643 | Nutritional                          |
| 2072   | ENSG00000175595 | 0.0795 | 0.9221 | 0.0862162 | Dermatological                       |
| 2      | ENSG00000175899 | 0.1813 | 0.5882 | 0.3082285 | Neurological                         |
| 3291   | ENSG00000176387 | 0.0785 | 0.6265 | 0.1252993 | Bone/Cardiovascular                  |
| 2303   | ENSG00000176692 | 0.0387 | 1.1405 | 0.0339325 | Hematological/Immunological          |
| 627    | ENSG00000176697 | 0.0163 | 0.349  | 0.0467049 | Neurological/Respiratory/Psychiatric |
| 7298   | ENSG00000176890 | 0.0501 | 0.4762 | 0.1052079 | multiple                             |
| 2524   | ENSG00000176920 | 0.1839 | 2.04   | 0.0901471 | Hematological/Immunological          |
| 4524   | ENSG00000177000 | 0.1163 | 0.5413 | 0.2148531 | Metabolic                            |
| 6888   | ENSG00000177156 | 0.0273 | 0.6536 | 0.0417687 | Metabolic                            |
| 6197   | ENSG00000177189 | 0.0006 | 0.2786 | 0.0021536 | Neurological/multiple                |
| 80324  | ENSG00000177192 | 0.0937 | 0.977  | 0.0959058 | multiple                             |

|        |                 |        |        |           |                                                  |
|--------|-----------------|--------|--------|-----------|--------------------------------------------------|
| 7050   | ENSG00000177426 | 0.0608 | 0.4082 | 0.1489466 | Developmental                                    |
| 79751  | ENSG00000177542 | 0.0195 | 0.8019 | 0.0243172 | Neurological                                     |
| 2629   | ENSG00000177628 | 0.0783 | 0.6112 | 0.1281086 | Metabolic                                        |
| 977    | ENSG00000177697 | 0.0354 | 1.005  | 0.0352239 | Renal                                            |
| 4729   | ENSG00000178127 | 0.0721 | 0.3803 | 0.1895872 | Neurological                                     |
| 5339   | ENSG00000178209 | 0.0299 | 1.595  | 0.0187461 | Muscular/Dermatological                          |
| 2731   | ENSG00000178445 | 0.0392 | 0.5608 | 0.0699001 | Metabolic                                        |
| 788    | ENSG00000178537 | 0.0384 | 0.3957 | 0.0970432 | Metabolic                                        |
| 7056   | ENSG00000178726 | 0.2123 | 1.4039 | 0.1512216 | Hematological/Cardiovascular                     |
| 4351   | ENSG00000178802 | 0.0843 | 0.3669 | 0.2297629 | Metabolic                                        |
| 2304   | ENSG00000178919 | 0.0472 | 0.8519 | 0.0554056 | Endocrine                                        |
| 59344  | ENSG00000179148 | 0.0628 | 0.5839 | 0.1075527 | Dermatological                                   |
| 2517   | ENSG00000179163 | 0.1001 | 0.654  | 0.1530581 | Metabolic                                        |
| 5781   | ENSG00000179295 | 0.0047 | 0.847  | 0.005549  | Developmental/multiple/Cancer                    |
| 3119   | ENSG00000179344 | 0.1563 | 0.6775 | 0.2307011 | Neurological                                     |
| 242    | ENSG00000179477 | 0.0706 | 0.8066 | 0.0875279 | Dermatological                                   |
| 4261   | ENSG00000179583 | 0.1723 | 0.9005 | 0.1913381 | Neurological/Connective tissue/Immunological     |
| 7054   | ENSG00000180176 | 0.0917 | 1.3071 | 0.0701553 | Neurological                                     |
| 2147   | ENSG00000180210 | 0.1085 | 0.6888 | 0.1575203 | Hematological                                    |
| 90411  | ENSG00000180398 | 0.0937 | 0.6566 | 0.1427048 | Hematological                                    |
| 3753   | ENSG00000180509 | 0.1381 | 0.8162 | 0.1691987 | multiple/Cardiovascular                          |
| 186    | ENSG00000180772 | 0.0431 | 0.4156 | 0.1037055 | Neurological                                     |
| 1728   | ENSG00000181019 | 0.0692 | 0.534  | 0.129588  | Unclassified/Cancer                              |
| 79147  | ENSG00000181027 | 0.03   | 1.0876 | 0.0275837 | Muscular                                         |
| 4869   | ENSG00000181163 | 0.0261 | 0.4606 | 0.0566652 | Cancer                                           |
| 6657   | ENSG00000181449 | 0.006  | 0.59   | 0.0101695 | Ophthalmological                                 |
| 6448   | ENSG00000181523 | 0.0557 | 1.1777 | 0.0472956 | Metabolic                                        |
| 2187   | ENSG00000181544 | 0.3978 | 0.4924 | 0.8078798 | multiple                                         |
| 259236 | ENSG00000181585 | 0.0288 | 0.5849 | 0.0492392 | Ear,Nose,Throat                                  |
| 5324   | ENSG00000181690 | 0.0202 | 0.4045 | 0.0499382 | Cancer                                           |
| 55343  | ENSG00000181830 | 0.0701 | 1.0528 | 0.0665843 | Metabolic                                        |
| 6517   | ENSG00000181856 | 0.0251 | 0.5674 | 0.0442369 | Endocrine                                        |
| 124590 | ENSG00000182040 | 0.0151 | 0.7636 | 0.0197748 | multiple                                         |
| 2131   | ENSG00000182197 | 0.003  | 0.1832 | 0.0163755 | Bone/Cancer                                      |
| 716    | ENSG00000182326 | 0.1579 | 0.5587 | 0.2826204 | Immunological                                    |
| 2055   | ENSG00000182372 | 0.0881 | 0.8654 | 0.1018026 | Neurological                                     |
| 785    | ENSG00000182389 | 0.008  | 0.4756 | 0.0168209 | Neurological                                     |
| 859    | ENSG00000182533 | 0.0222 | 1.0081 | 0.0220216 | Metabolic/Muscular/Cardiovascular                |
| 1436   | ENSG00000182578 | 0.1515 | 0.7706 | 0.1966001 | Cancer                                           |
| 4692   | ENSG00000182636 | 0.0875 | 0.6571 | 0.1331609 | multiple                                         |
| 79087  | ENSG00000182858 | 0.1252 | 0.761  | 0.1645204 | Metabolic                                        |
| 2130   | ENSG00000182944 | 0.0105 | 0.2255 | 0.0465632 | Cancer                                           |
| 18     | ENSG00000183044 | 0.0455 | 0.6106 | 0.0745169 | Metabolic                                        |
| 1482   | ENSG00000183072 | 0.0508 | 0.9987 | 0.0508661 | Cardiovascular                                   |
| 4703   | ENSG00000183091 | 0.0311 | 0.5633 | 0.0552104 | Muscular                                         |
| 54880  | ENSG00000183337 | 0.0569 | 0.3955 | 0.1438685 | multiple/Ophthalmological                        |
| 2275   | ENSG00000183386 | 0.0127 | 0.6103 | 0.0208094 | Hematological                                    |
| 5726   | ENSG00000183609 | 0.2433 | 0.4938 | 0.4927096 | Ear,Nose,Throat                                  |
| 9241   | ENSG00000183691 | 0.0035 | 0.5293 | 0.0066125 | Skeletal/multiple                                |
| 4978   | ENSG00000183715 | 0.0067 | 0.3615 | 0.0185339 | Cancer                                           |
| 11200  | ENSG00000183765 | 0.0988 | 0.6011 | 0.1643653 | Cancer                                           |
| 668    | ENSG00000183770 | 0.0138 | 0.8472 | 0.016289  | multiple/Renal                                   |
| 6331   | ENSG00000183873 | 0.0255 | 0.6787 | 0.0375718 | Cardiovascular                                   |
| 4068   | ENSG00000183918 | 0.0598 | 0.4829 | 0.1238352 | Endocrine/Connective tissue/Cancer/Immunological |
| 71     | ENSG00000184009 | 0.0182 | 1.008  | 0.0180556 | Ear,Nose,Throat                                  |
| 26276  | ENSG00000184056 | 0.0127 | 0.3977 | 0.0319336 | Gastrointestinal                                 |
| 6899   | ENSG00000184058 | 0.0501 | 1.0379 | 0.0482705 | multiple/Cardiovascular                          |
| 3786   | ENSG00000184156 | 0.0222 | 0.4386 | 0.0506156 | Neurological                                     |
| 152    | ENSG00000184160 | 0.0296 | 1.3451 | 0.0220058 | Cardiovascular                                   |
| 4070   | ENSG00000184292 | 0.1109 | 1.3919 | 0.0796753 | Ophthalmological                                 |
| 4990   | ENSG00000184302 | 0.0092 | 0.5796 | 0.015873  | Ophthalmological                                 |
| 84441  | ENSG00000184384 | 0.1058 | 0.4861 | 0.2176507 | Cancer                                           |
| 5627   | ENSG00000184500 | 0.1202 | 0.5756 | 0.2088256 | Hematological                                    |
| 10801  | ENSG00000184640 | 0.0442 | 0.9381 | 0.0471165 | Skeletal                                         |
| 1188   | ENSG00000184908 | 0.1111 | 0.7083 | 0.1568544 | multiple                                         |
| 7490   | ENSG00000184937 | 0.0304 | 0.4853 | 0.0626417 | multiple/Renal/Cancer                            |
| 2157   | ENSG00000185010 | 0.161  | 0.4038 | 0.3987122 | Hematological                                    |
| 404672 | ENSG00000185068 | 0.0068 | 0.8245 | 0.0082474 | Dermatological                                   |
| 4158   | ENSG00000185231 | 0.0582 | 1.0242 | 0.0568248 | Endocrine                                        |
| 2811   | ENSG00000185245 | 0.3169 | 0.6396 | 0.4954659 | Hematological                                    |
| 6948   | ENSG00000185339 | 0.179  | 0.6546 | 0.2734494 | Hematological                                    |
| 5071   | ENSG00000185345 | 0.0861 | 0.6552 | 0.1314103 | Neurological/Cancer/Immunological                |
| 3854   | ENSG00000185479 | 0.1799 | 0.7071 | 0.2544195 | Dermatological                                   |
| 10320  | ENSG00000185811 | 0.0303 | 0.5411 | 0.055997  | Cancer                                           |
| 5727   | ENSG00000185920 | 0.0216 | 0.5275 | 0.0409479 | Developmental/multiple/Cancer                    |
| 8660   | ENSG00000185950 | 0.0712 | 1.288  | 0.0552795 | Endocrine                                        |
| 6011   | ENSG00000185974 | 0.0713 | 1.0476 | 0.0680603 | Ophthalmological                                 |
| 6887   | ENSG00000186051 | 0.0969 | 0.357  | 0.2714286 | Cancer                                           |
| 3852   | ENSG00000186081 | 0.0477 | 0.5769 | 0.0826833 | Dermatological                                   |
| 120227 | ENSG00000186104 | 0.0614 | 0.3293 | 0.1864561 | Bone                                             |
| 51741  | ENSG00000186153 | 0.0333 | 0.7107 | 0.0468552 | Cancer                                           |
| 128178 | ENSG00000186197 | 0.1439 | 0.6197 | 0.2322091 | Dermatological                                   |
| 1187   | ENSG00000186510 | 0.108  | 0.7299 | 0.1479655 | multiple                                         |

|        |                                  |        |        |           |                                         |
|--------|----------------------------------|--------|--------|-----------|-----------------------------------------|
| 4771   | ENSG00000186575                  | 0.0082 | 0.5602 | 0.0146376 | Cancer                                  |
| 613    | ENSG00000186716                  | 0.026  | 0.7067 | 0.0367907 | Cancer                                  |
| 25794  | ENSG00000186765                  | 0.046  | 0.9336 | 0.0492716 | Ophthalmological                        |
| 2301   | ENSG00000186790                  | 0.0845 | 1.0284 | 0.0821665 | Ophthalmological                        |
| 3868   | ENSG00000186832                  | 0.0751 | 0.6483 | 0.1158414 | Dermatological                          |
| 3861   | ENSG00000186847                  | 0.0325 | 0.5177 | 0.0627777 | Dermatological                          |
| 4137   | ENSG00000186868                  | 0.1327 | 0.5408 | 0.2453772 | Neurological                            |
| 5465   | ENSG00000186951                  | 0.0362 | 0.8154 | 0.0443954 | Metabolic                               |
| 6007   | ENSG00000187010                  | 0.4471 | 0.8461 | 0.5284245 | Hematological                           |
| 83715  | ENSG00000187017                  | 0.0847 | 0.7725 | 0.109644  | Ear,Nose,Throat                         |
| 4286   | ENSG00000187098                  | 0.0279 | 0.4293 | 0.0649895 | multiple                                |
| 3859   | ENSG00000187242                  | 0.1218 | 0.6717 | 0.181331  | Ophthalmological                        |
| 4059   | ENSG00000187244                  | 0.1751 | 1.0795 | 0.1622047 | Hematological                           |
| 387129 | ENSG00000187258                  | 0.0987 | 0.6643 | 0.1485774 | Respiratory                             |
| 2057   | ENSG00000187266                  | 0.1009 | 0.6621 | 0.1523939 | Hematological                           |
| 1630   | ENSG00000187323                  | 0.0179 | 0.434  | 0.0412442 | Cancer                                  |
| 3767   | ENSG00000187486                  | 0.0184 | 0.8992 | 0.0204626 | Endocrine/Metabolic                     |
| 1282   | ENSG00000187498                  | 0.0593 | 0.6572 | 0.0902313 | Neurological                            |
| 7100   | ENSG00000187554                  | 0.1997 | 0.7024 | 0.2843109 | Immunological                           |
| 378884 | ENSG00000187566                  | 0.098  | 0.7574 | 0.12939   | Neurological                            |
| 2175   | ENSG00000187741                  | 0.2313 | 0.7126 | 0.324586  | multiple                                |
| 57697  | ENSG00000187790                  | 0.2297 | 0.6951 | 0.330456  | multiple                                |
| 1755   | ENSG00000187908                  | 0.2166 | 0.9263 | 0.2338335 | Cancer                                  |
| 1180   | ENSG00000188037                  | 0.067  | 0.494  | 0.1356275 | Muscular                                |
| 145873 | ENSG00000188095                  | 0.2269 | 0.686  | 0.330758  | Skeletal                                |
| 1287   | ENSG00000188153                  | 0.0475 | 0.3228 | 0.1471499 | Renal                                   |
| 4810   | ENSG00000188158                  | 0.0609 | 0.4121 | 0.1477797 | Ophthalmological                        |
| 5133   | ENSG00000188389                  | 0.2973 | 0.8809 | 0.3374957 | Immunological                           |
| 1121   | ENSG00000188419                  | 0.093  | 0.437  | 0.2128146 | Neurological/multiple/Ophthalmological  |
| 375298 | ENSG00000188452                  | 0.1745 | 0.6943 | 0.2513323 | Ophthalmological                        |
| 3040   | ENSG00000188536 /ENSG00000206172 | 0.0816 | 1.342  | 0.0608048 | Hematological                           |
| 3039   | ENSG00000188536/ENSG00000206172  | 0.0816 | 1.342  | 0.0608048 | Hematological                           |
| 1201   | ENSG00000188603                  | 0.0805 | 0.7401 | 0.1087691 | Neurological                            |
| 1806   | ENSG00000188641                  | 0.056  | 0.5459 | 0.1025829 | Metabolic                               |
| 6006   | ENSG00000188672                  | 0.3297 | 0.6824 | 0.4831477 | Hematological                           |
| 57835  | ENSG00000188687                  | 0.049  | 0.517  | 0.0947776 | Renal                                   |
| 7390   | ENSG00000188690                  | 0.1334 | 0.5894 | 0.2263319 | Metabolic                               |
| 155    | ENSG00000188778                  | 0.1341 | 0.716  | 0.1872905 | Nutritional                             |
| 120892 | ENSG00000188906                  | 0.077  | 0.6724 | 0.1145152 | Neurological                            |
| 2707   | ENSG00000188910                  | 0.0932 | 1.1062 | 0.0842524 | Ear,Nose,Throat/Dermatological          |
| 60506  | ENSG00000188937                  | 0.0853 | 1.1029 | 0.0773416 | Ophthalmological                        |
| 5649   | ENSG00000189056                  | 0.0236 | 0.5318 | 0.0443776 | Neurological                            |
| 9516   | ENSG00000189067                  | 0.2637 | 1.4866 | 0.1773846 | Neurological                            |
| 2688   | ENSG00000189162                  | 0.4671 | 2.2333 | 0.2091524 | Endocrine                               |
| 4128   | ENSG00000189221                  | 0.0712 | 0.561  | 0.1269162 | Unclassified                            |
| 7259   | ENSG00000189241                  | 0.2128 | 0.6189 | 0.3438358 | Unclassified                            |
| 127534 | ENSG00000189433                  | 0.0798 | 0.9164 | 0.0870799 | Dermatological                          |
| 3123   | ENSG00000196126                  | 0.2637 | 0.8119 | 0.3247937 | Immunological                           |
| 12     | ENSG00000196136                  | 0.4382 | 1.1698 | 0.3745939 | Unclassified/Respiratory                |
| 6275   | ENSG00000196154                  | 0.0312 | 0.7511 | 0.0415391 | Cancer                                  |
| 25894  | ENSG00000196155                  | 0.1522 | 0.5046 | 0.301625  | Neurological                            |
| 36     | ENSG00000196177                  | 0.1293 | 0.7855 | 0.1646085 | Metabolic                               |
| 487    | ENSG00000196296                  | 0.0173 | 0.6144 | 0.0281576 | Muscular                                |
| 54413  | ENSG00000196338                  | 0.0044 | 0.2951 | 0.0149102 | Psychiatric                             |
| 1604   | ENSG00000196352                  | 0.5145 | 1.0338 | 0.4976785 | Hematological                           |
| 5770   | ENSG00000196396                  | 0.0951 | 0.8541 | 0.1113453 | Metabolic                               |
| 6399   | ENSG00000196459                  | 0.0217 | 0.8022 | 0.0270506 | Skeletal                                |
| 3048   | ENSG00000196565                  | 0.2057 | 0.9416 | 0.2184579 | Hematological                           |
| 3908   | ENSG00000196569                  | 0.0639 | 0.5708 | 0.1119481 | Muscular                                |
| 4646   | ENSG00000196586                  | 0.0198 | 0.648  | 0.0305556 | Ear,Nose,Throat                         |
| 57591  | ENSG00000196588                  | 0.0861 | 0.5932 | 0.145145  | Cancer                                  |
| 4312   | ENSG00000196611                  | 0.3327 | 0.6679 | 0.4981285 | Respiratory                             |
| 2760   | ENSG00000196743                  | 0.2096 | 0.8125 | 0.2579692 | Metabolic                               |
| 5456   | ENSG00000196767                  | 0.0064 | 0.3917 | 0.016339  | Ear,Nose,Throat                         |
| 100    | ENSG00000196839                  | 0.0888 | 1.1691 | 0.0759559 | Immunological                           |
| 6334   | ENSG00000196876                  | 0.0066 | 0.6184 | 0.0106727 | Skeletal/Bone                           |
| 3914   | ENSG00000196878                  | 0.0948 | 0.7164 | 0.1323283 | Dermatological                          |
| 23365  | ENSG00000196914                  | 0.0568 | 0.3982 | 0.1426419 | Cancer                                  |
| 2316   | ENSG00000196924                  | 0.0138 | 0.7619 | 0.0181126 | Skeletal/Neurological/multiple          |
| 3482   | ENSG00000197081                  | 0.1075 | 0.807  | 0.1332094 | Cancer                                  |
| 6714   | ENSG00000197122                  | 0.0046 | 0.8208 | 0.0056043 | Cancer                                  |
| 6583   | ENSG00000197208                  | 0.0799 | 0.3926 | 0.203515  | Connective tissue                       |
| 25788  | ENSG00000197275                  | 0.1159 | 0.5288 | 0.2191755 | Cancer                                  |
| 641    | ENSG00000197299                  | 0.1355 | 0.4892 | 0.2769828 | Cancer                                  |
| 6584   | ENSG00000197375                  | 0.126  | 0.577  | 0.2183709 | Metabolic                               |
| 3064   | ENSG00000197386                  | 0.0506 | 0.5138 | 0.0984819 | Neurological/Psychiatric                |
| 4644   | ENSG00000197535                  | 0.0156 | 0.4319 | 0.0361195 | Dermatological                          |
| 1991   | ENSG00000197561                  | 0.1851 | 2.0422 | 0.0906375 | Hematological                           |
| 1288   | ENSG00000197565                  | 0.1408 | 0.4359 | 0.3230099 | Cancer                                  |
| 5167   | ENSG00000197594                  | 0.1206 | 0.6451 | 0.1869478 | Endocrine/Connective tissue/Nutritional |
| 4624   | ENSG00000197616                  | 0.0131 | 0.7323 | 0.0178888 | Cardiovascular                          |
| 3240   | ENSG00000197711                  | 0.1247 | 0.9039 | 0.1379577 | Hematological                           |
| 5660   | ENSG00000197746                  | 0.2077 | 0.8922 | 0.2327953 | Neurological/Metabolic                  |



|        |                 |        |        |           |                                                 |
|--------|-----------------|--------|--------|-----------|-------------------------------------------------|
| 1675   | ENSG00000197766 | 0.1994 | 8.471  | 0.0235391 | Ophthalmological/Immunological                  |
| 116085 | ENSG00000197891 | 0.1669 | 0.8445 | 0.1976317 | Renal                                           |
| 6687   | ENSG00000197912 | 0.0624 | 0.7884 | 0.0791476 | Neurological                                    |
| 23230  | ENSG00000197969 | 0.0851 | 0.5564 | 0.1529475 | Neurological                                    |
| 3792   | ENSG00000197993 | 0.1579 | 0.5137 | 0.3073778 | Hematological                                   |
| 51135  | ENSG00000198001 | 0.0966 | 1.1178 | 0.0864198 | Immunological                                   |
| 23607  | ENSG00000198087 | 0.0741 | 0.4248 | 0.174435  | Renal                                           |
| 4157   | ENSG00000198211 | 0.0162 | 1.3056 | 0.0124081 | Unclassified/Ophthalmological/Dermatological    |
| 4914   | ENSG00000198400 | 0.0772 | 0.6347 | 0.1216323 | Neurological/Cancer                             |
| 51062  | ENSG00000198513 | 0.0206 | 0.4277 | 0.0481646 | Neurological                                    |
| 1259   | ENSG00000198515 | 0.0525 | 0.5481 | 0.0957854 | Ophthalmological                                |
| 5350   | ENSG00000198523 | 0.01   | 0.7532 | 0.0132767 | Cardiovascular                                  |
| 6262   | ENSG00000198626 | 0.0193 | 0.7603 | 0.0253847 | Cardiovascular                                  |
| 6898   | ENSG00000198650 | 0.0435 | 0.6273 | 0.0693448 | Metabolic                                       |
| 9060   | ENSG00000198682 | 0.0459 | 0.5974 | 0.0768329 | Connective tissue                               |
| 24     | ENSG00000198691 | 0.0632 | 0.4921 | 0.1284292 | Ophthalmological                                |
| 2153   | ENSG00000198734 | 0.1858 | 0.5767 | 0.3221779 | Hematological                                   |
| 4860   | ENSG00000198805 | 0.1061 | 0.4683 | 0.2265642 | Immunological                                   |
| 5083   | ENSG00000198807 | 0.0065 | 0.3819 | 0.0170202 | Skeletal                                        |
| 2710   | ENSG00000198814 | 0.0134 | 0.3434 | 0.0390215 | Metabolic                                       |
| 57165  | ENSG00000198835 | 0.074  | 1.4125 | 0.0523894 | Neurological                                    |
| 4976   | ENSG00000198836 | 0.0183 | 0.5551 | 0.032967  | Ophthalmological                                |
| 916    | ENSG00000198851 | 0.2849 | 0.6511 | 0.4375672 | Immunological                                   |
| 7150   | ENSG00000198900 | 0.012  | 0.5395 | 0.0222428 | Metabolic                                       |
| 353    | ENSG00000198931 | 0.0881 | 0.915  | 0.0962842 | Metabolic                                       |
| 1756   | ENSG00000198947 | 0.0441 | 0.3213 | 0.1372549 | Muscular/Cardiovascular                         |
| 4668   | ENSG00000198951 | 0.1066 | 0.8629 | 0.1235369 | Metabolic                                       |
| 26128  | ENSG00000198954 | 0.0417 | 0.7016 | 0.0594356 | multiple                                        |
| 2812   | ENSG00000203618 | 0.0846 | 1.1576 | 0.0730822 | Hematological                                   |
| 1378   | ENSG00000203710 | 0.3052 | 0.528  | 0.5780303 | Hematological                                   |
| 2214   | ENSG00000203747 | 0.261  | 0.7852 | 0.3323994 | Hematological/Immunological                     |
| 4014   | ENSG00000203782 | 0.4225 | 3.6039 | 0.1172341 | multiple/Dermatological                         |
| 3284   | ENSG00000203859 | 0.2221 | 0.7058 | 0.3146784 | Metabolic                                       |
| 2664   | ENSG00000203879 | 0.0092 | 0.5061 | 0.0181782 | Neurological                                    |
| 54345  | ENSG00000203883 | 0.0658 | 0.9334 | 0.070495  | Dermatological                                  |
| 659    | ENSG00000204217 | 0.0165 | 0.3336 | 0.0494604 | Cardiovascular                                  |
| 1302   | ENSG00000204248 | 0.0321 | 0.3637 | 0.0882596 | Connective tissue/multiple/Bone/Ear,Nose,Throat |
| 1290   | ENSG00000204262 | 0.0282 | 0.4293 | 0.0656883 | Connective tissue                               |
| 6891   | ENSG00000204267 | 0.177  | 0.7878 | 0.2246763 | Immunological                                   |
| 6392   | ENSG00000204370 | 0.1011 | 0.5007 | 0.2019173 | Cancer                                          |
| 4758   | ENSG00000204386 | 0.0918 | 0.6708 | 0.1368515 | Cancer/Metabolic                                |
| 120329 | ENSG00000204403 | 0.3079 | 0.649  | 0.4744222 | Immunological                                   |
| 4795   | ENSG00000204498 | 0.0404 | 0.4512 | 0.089539  | Connective tissue                               |
| 1041   | ENSG00000204539 | 0.328  | 0.9882 | 0.3319166 | Dermatological                                  |
| 6311   | ENSG00000204842 | 0.0595 | 0.335  | 0.1776119 | Neurological                                    |
| 1639   | ENSG00000204843 | 0.0226 | 0.5276 | 0.0428355 | Neurological                                    |
| 9289   | ENSG00000205336 | 0.1128 | 1.0345 | 0.1090382 | Neurological                                    |
| 3426   | ENSG00000205403 | 0.204  | 0.705  | 0.2893617 | Hematological/Immunological                     |
| 3853   | ENSG00000205420 | 0.1744 | 0.6753 | 0.2582556 | Dermatological                                  |
| 6606   | ENSG00000205571 | 0.0769 | 0.555  | 0.1385586 | Muscular                                        |
| 8292   | ENSG00000206561 | 0.0484 | 0.3083 | 0.1569899 | Neurological                                    |
| 4893   | ENSG00000213281 | 0.0024 | 0.4173 | 0.0057513 | Cancer                                          |
| 3931   | ENSG00000213398 | 0.0848 | 0.5795 | 0.146333  | Metabolic                                       |
| 10011  | ENSG00000213523 | 0.0908 | 0.3978 | 0.2282554 | Skeletal                                        |
| 3073   | ENSG00000213614 | 0.0943 | 0.5082 | 0.1855569 | Metabolic                                       |
| 4722   | ENSG00000213619 | 0.071  | 0.3923 | 0.1809839 | Neurological                                    |
| 1773   | ENSG00000213918 | 0.1449 | 1.1444 | 0.1266166 | Immunological                                   |
| 2592   | ENSG00000213930 | 0.0479 | 0.5005 | 0.0957043 | Metabolic                                       |
| 3047   | ENSG00000213934 | 0.2114 | 0.9642 | 0.2192491 | Hematological                                   |
| 10195  | ENSG00000214160 | 0.0583 | 0.543  | 0.1073665 | Metabolic                                       |
| 55670  | ENSG00000215193 | 0.1982 | 0.8936 | 0.2217995 | Neurological/multiple                           |
| 2642   | ENSG00000215644 | 0.1075 | 1.2998 | 0.082705  | Endocrine                                       |
| 3813   | ENSG00000215764 | 0.4747 | 0.7189 | 0.6603144 | Immunological                                   |
| 2189   | ENSG00000221829 | 0.1837 | 0.4649 | 0.3951387 | multiple                                        |
| 3045   | ENSG00000223609 | 0.3584 | 0.6268 | 0.5717932 | Hematological                                   |
| 114902 | ENSG00000223953 | 0.0336 | 0.7917 | 0.0424403 | Ophthalmological                                |
| 721    | ENSG00000224389 | 0.1449 | 0.75   | 0.1932    | Immunological                                   |
| 2074   | ENSG00000225830 | 0.1291 | 0.5063 | 0.2549872 | multiple                                        |
| 4049   | ENSG00000226979 | 0.1638 | 0.6209 | 0.2638106 | Cardiovascular                                  |
| 1589   | ENSG00000231852 | 0.1789 | 1.0262 | 0.1743325 | Endocrine                                       |
| 6892   | ENSG00000231925 | 0.1958 | 0.7098 | 0.2758524 | Immunological                                   |
| 7124   | ENSG00000232810 | 0.1115 | 0.681  | 0.1637298 | Neurological/Respiratory/Immunological          |
| 344    | ENSG00000234906 | 0.2709 | 0.5766 | 0.4698231 | Metabolic                                       |
| 158    | ENSG00000239900 | 0.0476 | 0.642  | 0.0741433 | Metabolic                                       |
| 358    | ENSG00000240583 | 0.0988 | 0.8126 | 0.121585  | Unclassified/Hematological                      |
| 4282   | ENSG00000240972 | 0.0487 | 1.239  | 0.0393059 | Developmental/Connective tissue                 |
| 6997   | ENSG00000241186 | 0.2088 | 0.5189 | 0.4023897 | Neurological                                    |
| 54658  | ENSG00000241635 | 0.1299 | 0.6013 | 0.2160319 | Gastrointestinal/multiple/Metabolic             |
| 23600  | ENSG00000242110 | 0.1571 | 0.6013 | 0.2612673 | Metabolic                                       |
| 161497 | ENSG00000242866 | 0.0715 | 0.395  | 0.1810127 | Ear,Nose,Throat                                 |
| 720    | ENSG00000244731 | 0.1444 | 0.754  | 0.1915119 | Immunological                                   |
| 3043   | ENSG00000244734 | 0.3314 | 0.612  | 0.5415033 | Hematological                                   |
| 1415   | ENSG00000244752 | 0.0127 | 1.1938 | 0.0106383 | Ophthalmological                                |

|       |                                  |         |         |           |                       |
|-------|----------------------------------|---------|---------|-----------|-----------------------|
| 1050  | ENSG00000245848                  | 0.0268  | 0.7724  | 0.034697  | Cancer                |
| 593   | ENSG00000248098                  | 0.0396  | 1.1389  | 0.0347704 | Metabolic             |
| 3640  | ENSG00000248099                  | 10.1017 | 21.8382 | 0.4625702 | Renal                 |
| 7873  | ENSG00000249398 /ENSG00000145050 | 0.0131  | 0.3761  | 0.0348312 | Cancer                |
| 2994  | ENSG00000250361                  | 1.1641  | 1.5474  | 0.7522942 | Hematological         |
| 58510 | ENSG00000250799                  | 0.1256  | 0.7397  | 0.1697986 | Psychiatric/Metabolic |

**Supplementary Table 2. Entrez IDs of human morphogenes, physiogenes and morpho-physiological genes which affect both traits.**

| Morphogenes | Physiogenes | Morpho-physiological genes |
|-------------|-------------|----------------------------|
| 858         | 858         | 283120                     |
| 1316        | 1316        | 6909                       |
| 22955       | 22955       | 9496                       |
| 7473        | 7473        | 4804                       |
| 7483        | 7483        | 8313                       |
| 7030        | 7030        | 8074                       |
| 9355        | 9355        | 2251                       |
| 7706        | 7706        | 894                        |
| 1002        | 1002        | 7054                       |
| 10462       | 10462       | 3630                       |
| 56163       | 56163       | 6340                       |
| 91          | 91          | 2741                       |
| 889         | 889         | 4335                       |
| 3099        | 3099        | 3689                       |
| 3216        | 3216        | 10400                      |
| 8850        | 8850        | 999                        |
| 1411        | 1411        | 6692                       |
| 29947       | 29947       | 1159                       |
| 5176        | 5176        | 255877                     |
| 6932        | 6932        | 83605                      |
| 9026        | 9026        | 3932                       |
| 3206        | 3206        | 2589                       |
| 6667        | 6667        | 4617                       |
| 54          | 54          | 5468                       |
| 1264        | 1264        | 5894                       |
| 80781       | 80781       | 5155                       |
| 6573        | 6573        | 94                         |
| 4222        | 4222        | 146691                     |
| 1747        | 1747        | 25946                      |
| 7289        | 7289        | 3678                       |
| 317719      | 317719      | 6662                       |
| 147409      | 147409      | 3184                       |
| 2129        | 2129        | 2760                       |
| 3239        | 3239        | 124925                     |
| 3238        | 3238        | 696                        |
| 8021        | 8021        | 326                        |
| 26576       | 26576       | 23308                      |
| 79090       | 79090       | 6687                       |
| 22976       | 22976       | 6117                       |
| 1616        | 1616        | 3782                       |
| 9985        | 9985        | 762                        |
| 1434        | 1434        | 356                        |
| 3912        | 3912        | 80331                      |
| 4059        | 4059        | 2332                       |
| 1943        | 1943        | 3565                       |
| 5049        | 5049        | 1621                       |
| 10913       | 10913       | 6598                       |
| 5324        | 5324        | 3201                       |
| 9817        | 9817        | 6638                       |
| 23385       | 23385       | 4323                       |
| 256126      | 256126      | 9056                       |
| 4296        | 4296        | 5598                       |
| 11331       | 11331       | 1291                       |
| 8452        | 8452        | 369                        |
| 5501        | 5501        | 7076                       |
| 3982        | 3982        | 8888                       |
| 10620       | 10620       | 4084                       |
| 51715       | 51715       | 1811                       |
| 688         | 688         | 10266                      |
| 7001        | 7001        | 51599                      |
| 5430        | 5430        | 3249                       |
| 54101       | 54101       | 1152                       |
| 25828       | 25828       | 3695                       |
| 5050        | 5050        | 5916                       |
| 4438        | 4438        | 1948                       |
| 2128        | 2128        | 4209                       |
| 10155       | 10155       | 9520                       |
| 1982        | 1982        | 7080                       |
| 10797       | 10797       | 5083                       |
| 23626       | 23626       | 1277                       |
| 7182        | 7182        | 3675                       |
| 7181        | 7181        | 6442                       |

|           |           |       |
|-----------|-----------|-------|
| 7709      | 7709      | 2305  |
| 2057      | 2057      | 3728  |
| 4352      | 4352      | 3110  |
| 333       | 333       | 3475  |
| 998       | 998       | 231   |
| 5316      | 5316      | 3229  |
| 51053     | 51053     | 3224  |
| 4439      | 4439      | 3223  |
| 7046      | 7046      | 207   |
| 5889      | 5889      | 10312 |
| 57178     | 57178     | 4669  |
| 8289      | 8289      | 6608  |
| 7316      | 7316      | 2346  |
| 29781     | 29781     | 826   |
| 430       | 430       | 2348  |
| 56154     | 56154     | 5879  |
| 7342      | 7342      | 4052  |
| 3373      | 3373      | 4784  |
| 23495     | 23495     | 90952 |
| 56155     | 56155     | 2010  |
| 253738    | 253738    | 2892  |
| 1618      | 1618      | 4861  |
| 64327     | 64327     | 4297  |
| 7262      | 7262      | 8456  |
| 7472      | 7472      | 9094  |
| 55697     | 55697     | 898   |
| 63946     | 63946     | 4607  |
| 79923     | 79923     | 53    |
| 2119      | 2119      | 5913  |
| 8682      | 8682      | 10062 |
| 10919     | 10919     | 1643  |
| 9191      | 9191      | 6688  |
| 27101     | 27101     | 6778  |
| 257       | 257       | 5467  |
| 729330    | 729330    | 50619 |
| 7329      | 7329      | 5178  |
| 3149      | 3149      | 64788 |
| 4616      | 4616      | 51129 |
| 4855      | 4855      | 656   |
| 3097      | 3097      | 673   |
| 140628    | 140628    | 7249  |
| 3911      | 3911      | 558   |
| 9869      | 9869      | 7040  |
| 9915      | 9915      | 6469  |
| 51107     | 51107     | 5587  |
| 5860      | 5860      | 3937  |
| 11034     | 11034     | 8575  |
| 7481      | 7481      | 3714  |
| 7319      | 7319      | 4664  |
| 1871      | 1871      | 948   |
| 10762     | 10762     | 5971  |
| 5335      | 5335      | 348   |
| 9862      | 9862      | 5577  |
| 23512     | 23512     | 9314  |
| 342574    | 342574    | 4218  |
| 332       | 332       | 1999  |
| 4605      | 4605      | 6794  |
| 5216      | 5216      | 3991  |
| 11127     | 11127     | 5903  |
| 7484      | 7484      | 3055  |
| 8701      | 8701      | 784   |
| 6926      | 6926      | 51303 |
| 9313      | 9313      | 973   |
| 3975      | 3975      | 5865  |
| 81565     | 81565     | 10683 |
| 6425      | 6425      | 1395  |
| 5892      | 5892      | 5625  |
| 29893     | 29893     | 780   |
| 8533      | 8533      | 8870  |
| 57556     | 57556     | 2354  |
| 26271     | 26271     | 2067  |
| 5980      | 5980      | 1356  |
| 100126572 | 100126572 | 51141 |
| 84870     | 84870     | 2639  |
| 6098      | 6098      | 1777  |

|        |        |        |
|--------|--------|--------|
| 5033   | 5033   | 811    |
| 3987   | 3987   | 10725  |
| 11081  | 11081  | 1728   |
| 9053   | 9053   | 2997   |
| 8835   | 8835   | 581    |
| 9891   | 9891   | 3575   |
| 50511  | 50511  | 7019   |
| 219699 | 219699 | 55120  |
| 54541  | 54541  | 6774   |
| 5787   | 5787   | 6776   |
| 10818  | 10818  | 208    |
| 23242  | 23242  | 9093   |
| 8131   | 8131   | 3163   |
| 25759  | 25759  | 1786   |
| 5515   | 5515   | 777    |
| 7320   | 7320   | 2115   |
| 3364   | 3364   | 5660   |
| 64759  | 64759  | 8517   |
| 7832   | 7832   | 5076   |
| 23481  | 23481  | 5777   |
| 3985   | 3985   | 1184   |
| 23598  | 23598  | 1182   |
| 2202   | 2202   | 64344  |
| 3996   | 3996   | 6750   |
| 4148   | 4148   | 9215   |
| 23161  | 23161  | 637    |
| 5608   | 5608   | 9846   |
| 29841  | 29841  | 8887   |
| 1738   | 1738   | 1510   |
| 54475  | 54475  | 10908  |
| 3980   | 3980   | 57192  |
| 4215   | 4215   | 945    |
| 2688   | 2688   | 51741  |
| 2081   | 2081   | 7299   |
| 1655   | 1655   | 2692   |
| 2584   | 2584   | 358    |
| 7531   | 7531   | 9734   |
| 3859   | 3859   | 5228   |
| 9020   | 9020   | 5449   |
| 4990   | 4990   | 8985   |
| 677    | 677    | 5077   |
| 9252   | 9252   | 3930   |
| 5641   | 5641   | 1382   |
| 338917 | 338917 | 63827  |
| 27030  | 27030  | 4145   |
| 55384  | 55384  | 5604   |
| 81693  | 81693  | 7784   |
| 56033  | 56033  | 53828  |
| 4969   | 4969   | 5567   |
| 53358  | 53358  | 6448   |
| 2176   | 2176   | 1476   |
| 64324  | 64324  | 5830   |
| 5307   | 5307   | 960    |
| 1404   | 1404   | 6506   |
| 1462   | 1462   | 440275 |
| 10769  | 10769  | 9948   |
| 4214   | 4214   | 4125   |
| 54514  | 54514  | 10699  |
| 23522  | 23522  | 5618   |
| 285381 | 285381 | 2264   |
| 649    | 649    | 23581  |
| 1638   | 1638   | 6507   |
| 160897 | 160897 | 3568   |
| 9180   | 9180   | 80204  |
| 1603   | 1603   | 51085  |
| 51663  | 51663  | 3162   |
| 9037   | 9037   | 5566   |
| 7204   | 7204   | 10658  |
| 8323   | 8323   | 5447   |
| 284    | 284    | 3480   |
| 116039 | 116039 | 3643   |
| 5905   | 5905   | 495    |
| 23467  | 23467  | 4208   |
| 25776  | 25776  | 10335  |
| 11144  | 11144  | 5710   |

|        |        |        |
|--------|--------|--------|
| 27127  | 27127  | 3815   |
| 80070  | 80070  | 9970   |
| 3280   | 3280   | 336    |
| 2072   | 2072   | 4068   |
| 23513  | 23513  | 181    |
| 214    | 214    | 5816   |
| 27136  | 27136  | 919    |
| 25945  | 25945  | 7782   |
| 54820  | 54820  | 26258  |
| 54700  | 54700  | 8740   |
| 91653  | 91653  | 2627   |
| 3693   | 3693   | 1260   |
| 9718   | 9718   | 324    |
| 7066   | 7066   | 10499  |
| 1859   | 1859   | 7200   |
| 200894 | 200894 | 5013   |
| 9119   | 9119   | 1497   |
| 23017  | 23017  | 2049   |
| 29127  | 29127  | 1773   |
| 466    | 466    | 7306   |
| 3854   | 3854   | 10216  |
| 3875   | 3875   | 8775   |
| 6895   | 6895   | 1399   |
| 25914  | 25914  | 11023  |
| 9104   | 9104   | 27033  |
| 8521   | 8521   | 2687   |
| 5630   | 5630   | 2678   |
| 84667  | 84667  | 2192   |
| 5754   | 5754   | 7010   |
| 5961   | 5961   | 1969   |
| 129685 | 129685 | 89     |
| 7942   | 7942   | 582    |
| 116113 | 116113 | 1535   |
| 23476  | 23476  | 3549   |
| 1409   | 1409   | 540    |
| 23683  | 23683  | 6521   |
| 527    | 527    | 353    |
| 10736  | 10736  | 3077   |
| 30812  | 30812  | 4868   |
| 2289   | 2289   | 1594   |
| 25805  | 25805  | 1019   |
| 51626  | 51626  | 2583   |
| 9984   | 9984   | 1267   |
| 4225   | 4225   | 55959  |
| 6015   | 6015   | 6648   |
| 2676   | 2676   | 10617  |
| 5460   | 5460   | 9001   |
| 3909   | 3909   | 1499   |
| 81848  | 81848  | 8646   |
| 30062  | 30062  | 4758   |
| 5366   | 5366   | 477    |
| 2201   | 2201   | 4161   |
| 1044   | 1044   | 2561   |
| 3619   | 3619   | 857    |
| 22917  | 22917  | 598    |
| 2237   | 2237   | 1734   |
| 8718   | 8718   | 126129 |
| 80351  | 80351  | 117581 |
| 9414   | 9414   | 3399   |
| 5883   | 5883   | 9244   |
| 1761   | 1761   | 1509   |
| 1474   | 1474   | 401    |
| 22943  | 22943  | 7976   |
| 5017   | 5017   | 53834  |
| 8986   | 8986   | 2274   |
| 2101   | 2101   | 6689   |
| 6934   | 6934   | 2004   |
| 1592   | 1592   | 204851 |
| 7093   | 7093   | 10905  |
| 6585   | 6585   | 10014  |
| 403    | 403    | 2551   |
| 56165  | 56165  | 655    |
| 27319  | 27319  | 4771   |
| 5986   | 5986   | 2130   |
| 3195   | 3195   | 6899   |

|        |        |        |
|--------|--------|--------|
| 10660  | 10660  | 2780   |
| 8945   | 8945   | 80856  |
| 212    | 212    | 4353   |
| 4935   | 4935   | 4233   |
| 51119  | 51119  | 6854   |
| 10220  | 10220  | 4654   |
| 6490   | 6490   | 340990 |
| 4284   | 4284   | 3784   |
| 4640   | 4640   | 57496  |
| 1294   | 1294   | 54457  |
| 10733  | 10733  | 613    |
| 7123   | 7123   | 89780  |
| 9146   | 9146   | 11334  |
| 90249  | 90249  | 9254   |
| 64321  | 64321  | 10482  |
| 10987  | 10987  | 5629   |
| 7013   | 7013   | 2070   |
| 9242   | 9242   | 4661   |
| 1420   | 1420   | 5664   |
| 23451  | 23451  | 5333   |
| 7341   | 7341   | 2554   |
| 1290   | 1290   | 7434   |
| 9448   | 9448   | 8728   |
| 4880   | 4880   | 8929   |
| 25791  | 25791  | 64072  |
| 79083  | 79083  | 5802   |
| 51665  | 51665  | 10642  |
| 10096  | 10096  | 8854   |
| 57669  | 57669  | 5728   |
| 25909  | 25909  | 4633   |
| 83881  | 83881  | 4817   |
| 5451   | 5451   | 5079   |
| 1805   | 1805   | 84662  |
| 467    | 467    | 80114  |
| 3664   | 3664   | 10461  |
| 3914   | 3914   | 7251   |
| 3800   | 3800   | 11234  |
| 10152  | 10152  | 4216   |
| 29988  | 29988  | 1435   |
| 2820   | 2820   | 547    |
| 1289   | 1289   | 3199   |
| 9839   | 9839   | 6908   |
| 10787  | 10787  | 28514  |
| 79901  | 79901  | 8996   |
| 6749   | 6749   | 11093  |
| 3234   | 3234   | 1874   |
| 2132   | 2132   | 7525   |
| 9318   | 9318   | 2588   |
| 2252   | 2252   | 2624   |
| 6652   | 6652   | 220    |
| 64096  | 64096  | 4133   |
| 5888   | 5888   | 19     |
| 650    | 650    | 1536   |
| 699    | 699    | 59272  |
| 631    | 631    | 177    |
| 9837   | 9837   | 9374   |
| 9371   | 9371   | 405    |
| 55578  | 55578  | 3673   |
| 4154   | 4154   | 4023   |
| 8900   | 8900   | 1482   |
| 9201   | 9201   | 6722   |
| 6474   | 6474   | 2625   |
| 6847   | 6847   | 23118  |
| 81839  | 81839  | 6834   |
| 148327 | 148327 | 2796   |
| 51176  | 51176  | 7143   |
| 839    | 839    | 4780   |
| 7059   | 7059   | 6256   |
| 8799   | 8799   | 2209   |
| 4126   | 4126   | 654817 |
| 9134   | 9134   | 776    |
| 4325   | 4325   | 9620   |
| 8543   | 8543   | 2313   |
| 2045   | 2045   | 3290   |
| 7295   | 7295   | 81027  |

|        |        |        |
|--------|--------|--------|
| 5069   | 5069   | 7490   |
| 51510  | 51510  | 947    |
| 2189   | 2189   | 80380  |
| 768    | 768    | 3586   |
| 9048   | 9048   | 3920   |
| 51361  | 51361  | 8418   |
| 7022   | 7022   | 638    |
| 2046   | 2046   | 23213  |
| 6924   | 6924   | 164656 |
| 3155   | 3155   | 6385   |
| 8438   | 8438   | 672    |
| 6491   | 6491   | 2520   |
| 3362   | 3362   | 8506   |
| 5782   | 5782   | 124626 |
| 1912   | 1912   | 5697   |
| 1441   | 1441   | 51701  |
| 5511   | 5511   | 9618   |
| 10371  | 10371  | 284086 |
| 2035   | 2035   | 785    |
| 390992 | 390992 | 7155   |
| 1676   | 1676   | 5915   |
| 56998  | 56998  | 3487   |
| 2475   | 2475   | 29     |
| 4879   | 4879   | 958    |
| 1677   | 1677   | 3174   |
| 5590   | 5590   | 100    |
| 142678 | 142678 | 2118   |
| 10049  | 10049  | 4318   |
| 11117  | 11117  | 57468  |
| 1058   | 1058   | 10723  |
| 7358   | 7358   | 5476   |
| 399    | 399    | 1398   |
| 323    | 323    | 5306   |
| 2044   | 2044   | 57158  |
| 5978   | 5978   | 3172   |
| 22823  | 22823  | 5740   |
| 8317   | 8317   | 93664  |
| 10117  | 10117  | 7975   |
| 7049   | 7049   | 5469   |
| 1758   | 1758   | 2065   |
| 2250   | 2250   | 22806  |
| 8459   | 8459   | 6738   |
| 57619  | 57619  | 5376   |
| 9271   | 9271   | 2661   |
| 10094  | 10094  | 6910   |
| 9612   | 9612   | 8844   |
| 57634  | 57634  | 7716   |
| 5829   | 5829   | 4137   |
| 22797  | 22797  | 9611   |
| 3955   | 3955   | 7703   |
| 64211  | 64211  | 8396   |
| 25913  | 25913  | 51087  |
| 2146   | 2146   | 6517   |
| 389549 | 389549 | 37     |
| 2050   | 2050   | 10146  |
| 5118   | 5118   | 475    |
| 135935 | 135935 | 6678   |
| 1750   | 1750   | 1394   |
| 800    | 800    | 10320  |
| 60412  | 60412  | 1778   |
| 57671  | 57671  | 407977 |
| 56916  | 56916  | 23461  |
| 344018 | 344018 | 4629   |
| 26018  | 26018  | 4151   |
| 7555   | 7555   | 3659   |
| 9039   | 9039   | 6584   |
| 9573   | 9573   | 3562   |
| 8531   | 8531   | 1437   |
| 11171  | 11171  | 58191  |
| 7004   | 7004   | 246    |
| 8924   | 8924   | 3211   |
| 5046   | 5046   | 1870   |
| 5045   | 5045   | 5351   |
| 10519  | 10519  | 9545   |
| 145873 | 145873 | 6324   |



|        |        |        |
|--------|--------|--------|
| 8800   | 8800   | 56956  |
| 23682  | 23682  | 196    |
| 10298  | 10298  | 124056 |
| 8726   | 8726   | 23770  |
| 6911   | 6911   | 10755  |
| 50852  | 50852  | 57048  |
| 5930   | 5930   | 5731   |
| 8463   | 8463   | 7314   |
| 7073   | 7073   | 10000  |
| 3611   | 3611   | 1130   |
| 9965   | 9965   | 3858   |
| 10682  | 10682  | 2099   |
| 64102  | 64102  | 23345  |
| 2717   | 2717   | 3066   |
| 2182   | 2182   | 23493  |
| 3052   | 3052   | 5110   |
| 265    | 265    | 7101   |
| 395    | 395    | 5325   |
| 1852   | 1852   | 7402   |
| 55558  | 55558  | 2911   |
| 3916   | 3916   | 8936   |
| 6011   | 6011   | 10758  |
| 55326  | 55326  | 2534   |
| 8973   | 8973   | 3910   |
| 1284   | 1284   | 7128   |
| 2823   | 2823   | 57120  |
| 10395  | 10395  | 3298   |
| 8754   | 8754   | 3908   |
| 9353   | 9353   | 6492   |
| 2936   | 2936   | 1634   |
| 1009   | 1009   | 246213 |
| 8467   | 8467   | 84159  |
| 164    | 164    | 1848   |
| 10265  | 10265  | 4254   |
| 57019  | 57019  | 5663   |
| 1311   | 1311   | 6446   |
| 7014   | 7014   | 80184  |
| 23563  | 23563  | 317    |
| 58     | 58     | 4602   |
| 5818   | 5818   | 383    |
| 25833  | 25833  | 1490   |
| 8538   | 8538   | 5191   |
| 1410   | 1410   | 1407   |
| 8882   | 8882   | 7078   |
| 29118  | 29118  | 5053   |
| 64221  | 64221  | 429    |
| 5300   | 5300   | 3479   |
| 4734   | 4734   | 23411  |
| 54778  | 54778  | 26091  |
| 9133   | 9133   | 9559   |
| 26035  | 26035  | 8879   |
| 4351   | 4351   | 5092   |
| 4016   | 4016   | 29110  |
| 4756   | 4756   | 1956   |
| 6642   | 6642   | 552    |
| 9096   | 9096   | 51542  |
| 6599   | 6599   | 8549   |
| 64651  | 64651  | 1794   |
| 2047   | 2047   | 2593   |
| 51560  | 51560  | 3779   |
| 8419   | 8419   | 4211   |
| 10293  | 10293  | 6929   |
| 26508  | 26508  | 2887   |
| 284217 | 284217 | 135    |
| 26259  | 26259  | 4193   |
| 2181   | 2181   | 144455 |
| 55081  | 55081  | 11055  |
| 23077  | 23077  | 8943   |
| 6663   | 6663   | 11213  |
| 29843  | 29843  | 7296   |
| 29775  | 29775  | 5966   |
| 3299   | 3299   | 5194   |
| 23322  | 23322  | 4350   |
| 5792   | 5792   | 91978  |
| 22862  | 22862  | 6711   |

|        |        |       |
|--------|--------|-------|
| 1427   | 1427   | 51298 |
| 151516 | 151516 | 10272 |
| 55124  | 55124  | 900   |
| 6917   | 6917   | 610   |
| 8928   | 8928   | 4245  |
| 1500   | 1500   | 6444  |
| 9973   | 9973   | 2324  |
| 3976   | 3976   | 5601  |
| 55075  | 55075  | 821   |
| 6405   | 6405   | 10111 |
| 80144  | 80144  | 3596  |
| 83552  | 83552  | 3702  |
| 148979 | 148979 | 4744  |
| 79809  | 79809  | 7378  |
| 26108  | 26108  | 9232  |
| 25831  | 25831  | 3486  |
| 4281   | 4281   | 3484  |
| 726    | 726    | 107   |
| 3872   | 3872   | 6525  |
| 147183 | 147183 | 29881 |
| 10988  | 10988  | 57142 |
| 3225   | 3225   | 58498 |
| 54815  | 54815  | 165   |
| 51079  | 51079  | 27434 |
| 2821   | 2821   | 28988 |
| 6478   | 6478   | 7494  |
| 6305   | 6305   | 5414  |
| 9509   | 9509   | 6198  |
| 23654  | 23654  | 2890  |
| 56243  | 56243  | 8493  |
| 27161  | 27161  | 31    |
| 23353  | 23353  | 93649 |
| 79813  | 79813  | 58488 |
| 143689 | 143689 | 5294  |
| 9635   | 9635   | 9475  |
| 8862   | 8862   | 6382  |
| 322    | 322    | 23175 |
| 4838   | 4838   | 4897  |
| 64598  | 64598  | 8787  |
| 55733  | 55733  | 338   |
| 7071   | 7071   | 10672 |
| 51366  | 51366  | 5573  |
| 51735  | 51735  | 2281  |
| 10140  | 10140  | 3398  |
| 10979  | 10979  | 8648  |
| 64841  | 64841  | 5172  |
| 3015   | 3015   | 109   |
| 127385 | 127385 | 5443  |
| 58508  | 58508  | 1788  |
| 3316   | 3316   | 7173  |
| 4854   | 4854   | 6928  |
| 3207   | 3207   | 1636  |
| 3204   | 3204   | 3690  |
| 8482   | 8482   | 40    |
| 7027   | 7027   | 4763  |
| 26160  | 26160  | 5175  |
| 79600  | 79600  | 27092 |
| 4170   | 4170   | 9368  |
| 10139  | 10139  | 2905  |
| 3215   | 3215   | 60386 |
| 3217   | 3217   | 5048  |
| 5753   | 5753   | 3691  |
| 10637  | 10637  | 443   |
| 6496   | 6496   | 51    |
| 5245   | 5245   | 5023  |
| 4122   | 4122   | 8811  |
| 11083  | 11083  | 4843  |
| 7332   | 7332   | 6532  |
| 22853  | 22853  | 642   |
| 654    | 654    | 9501  |
| 290    | 290    | 64132 |
| 84456  | 84456  | 3219  |
| 3485   | 3485   | 782   |
| 8301   | 8301   | 84961 |
| 26047  | 26047  | 1742  |

|        |        |        |
|--------|--------|--------|
| 1041   | 1041   | 1856   |
| 3192   | 3192   | 3000   |
| 473    | 473    | 4628   |
| 140825 | 140825 | 9423   |
| 8468   | 8468   | 3880   |
| 59338  | 59338  | 2648   |
| 1021   | 1021   | 6777   |
| 23586  | 23586  | 2670   |
| 60529  | 60529  | 2290   |
| 3574   | 3574   | 7253   |
| 55626  | 55626  | 2581   |
| 4146   | 4146   | 55012  |
| 8481   | 8481   | 4792   |
| 25825  | 25825  | 2954   |
| 23132  | 23132  | 2100   |
| 653441 | 653441 | 6710   |
| 8820   | 8820   | 2530   |
| 6468   | 6468   | 624    |
| 5991   | 5991   | 145258 |
| 255743 | 255743 | 4331   |
| 10268  | 10268  | 5583   |
| 6541   | 6541   | 3091   |
| 9743   | 9743   | 145226 |
| 154796 | 154796 | 10490  |
| 121643 | 121643 | 10516  |
| 54892  | 54892  | 1113   |
| 1415   | 1415   | 57578  |
| 55193  | 55193  | 8650   |
| 26354  | 26354  | 10577  |
| 2709   | 2709   | 2353   |
| 3231   | 3231   | 7043   |
| 3233   | 3233   | 2103   |
| 3237   | 3237   | 51466  |
| 10019  | 10019  | 7528   |
| 1660   | 1660   | 2222   |
| 2322   | 2322   | 7187   |
| 6615   | 6615   | 3831   |
| 3203   | 3203   | 29933  |
| 81285  | 81285  | 6262   |
| 342184 | 342184 | 2737   |
| 137814 | 137814 | 5617   |
| 50674  | 50674  | 3662   |
| 1418   | 1418   | 7020   |
| 80005  | 80005  | 2651   |
| 387914 | 387914 | 9247   |
| 115286 | 115286 | 4739   |
| 9394   | 9394   | 1906   |
| 146760 | 146760 | 7172   |
| 8295   | 8295   | 3400   |
| 390874 | 390874 | 8737   |
| 167826 | 167826 | 6745   |
| 200734 | 200734 | 10507  |
| 5790   | 5790   | 6850   |
| 9480   | 9480   | 4920   |
| 91603  | 91603  | 5727   |
| 3483   | 3483   | 4488   |
| 116448 | 116448 | 1514   |
| 54345  | 54345  | 1812   |
| 10063  | 10063  | 6569   |
| 8739   | 8739   | 347732 |
| 29985  | 29985  | 9547   |
| 2830   | 2830   | 3578   |
| 202018 | 202018 | 4090   |
| 343930 | 343930 | 5921   |
| 934    | 934    | 23287  |
| 79659  | 79659  | 85409  |
| 2596   | 2596   | 9319   |
| 7050   | 7050   | 51752  |
| 10124  | 10124  | 5122   |
| 90780  | 90780  | 6715   |
| 643    | 643    | 50805  |
| 10361  | 10361  | 6531   |
| 388585 | 388585 | 7015   |
| 64783  | 64783  | 7518   |
| 8085   | 8085   | 1160   |

|        |        |        |
|--------|--------|--------|
| 54329  | 54329  | 64924  |
| 64919  | 64919  | 5884   |
| 221833 | 221833 | 4950   |
| 2700   | 2700   | 6606   |
| 23592  | 23592  | 9607   |
| 6159   | 6159   | 3074   |
| 3213   | 3213   | 10788  |
| 3005   | 3005   | 2150   |
| 57575  | 57575  | 1393   |
| 6297   | 6297   | 8546   |
| 6249   | 6249   | 3796   |
| 10481  | 10481  | 1161   |
| 341276 | 341276 | 5144   |
| 2249   | 2249   | 115827 |
| 9      | 9      | 2255   |
| 23394  | 23394  | 9497   |
| 4435   | 4435   | 6314   |
| 150684 | 150684 | 55079  |
| 112802 | 112802 | 3572   |
| 339345 | 339345 | 4724   |
| 56979  | 56979  | 10468  |
| 27173  | 27173  | 7068   |
| 7430   | 7430   | 9231   |
| 3276   | 3276   | 6435   |
| 6092   | 6092   | 6441   |
| 5454   | 5454   | 657    |
| 10413  | 10413  | 11155  |
| 1834   | 1834   | 94233  |
| 26227  | 26227  | 92211  |
| 7130   | 7130   | 310    |
| 6925   | 6925   | 5532   |
| 7092   | 7092   | 5328   |
| 57680  | 57680  | 7414   |
| 10661  | 10661  | 652    |
| 8038   | 8038   | 5015   |
| 102    | 102    | 4860   |
| 1832   | 1832   | 23473  |
| 150572 | 150572 | 4477   |
| 10521  | 10521  | 8505   |
| 2306   | 2306   | 1103   |
| 3050   | 3050   | 5599   |
| 83439  | 83439  | 1508   |
| 6279   | 6279   | 2626   |
| 9306   | 9306   | 7086   |
| 342977 | 342977 | 26524  |
| 1296   | 1296   | 2254   |
| 1072   | 1072   | 7474   |
| 4081   | 4081   | 1361   |
| 10586  | 10586  | 11061  |
| 8817   | 8817   | 1191   |
| 23022  | 23022  | 64641  |
| 2909   | 2909   | 4741   |
| 5607   | 5607   | 4747   |
| 10782  | 10782  | 4824   |
| 10522  | 10522  | 8795   |
| 158326 | 158326 | 57626  |
| 4149   | 4149   | 55806  |
| 4810   | 4810   | 6440   |
| 402381 | 402381 | 2039   |
| 3851   | 3851   | 8822   |
| 3306   | 3306   | 9046   |
| 8487   | 8487   | 2675   |
| 7178   | 7178   | 5925   |
| 9542   | 9542   | 7347   |
| 10388  | 10388  | 10253  |
| 253430 | 253430 | 1910   |
| 1001   | 1001   | 1203   |
| 5495   | 5495   | 5611   |
| 6387   | 6387   | 2668   |
| 28996  | 28996  | 2533   |
| 9472   | 9472   | 1601   |
| 23648  | 23648  | 8106   |
| 9693   | 9693   | 4883   |
| 1164   | 1164   | 84502  |
| 5055   | 5055   | 7051   |

|        |        |        |
|--------|--------|--------|
| 9270   | 9270   | 27141  |
| 340665 | 340665 | 479    |
| 55630  | 55630  | 51151  |
| 9723   | 9723   | 23600  |
| 11202  | 11202  | 1767   |
| 3849   | 3849   | 56172  |
| 65979  | 65979  | 50484  |
| 26011  | 26011  | 81501  |
| 7044   | 7044   | 23414  |
| 7704   | 7704   | 4609   |
| 5268   | 5268   | 3037   |
| 27022  | 27022  | 114    |
| 1421   | 1421   | 7477   |
| 659    | 659    | 5465   |
| 4301   | 4301   | 10454  |
| 150365 | 150365 | 5168   |
| 1295   | 1295   | 7380   |
| 3196   | 3196   | 2547   |
| 1952   | 1952   | 51564  |
| 6272   | 6272   | 7421   |
| 3563   | 3563   | 1280   |
| 6741   | 6741   | 5619   |
| 7818   | 7818   | 4261   |
| 6736   | 6736   | 604    |
| 83447  | 83447  | 8626   |
| 2195   | 2195   | 9076   |
| 871    | 871    | 23295  |
| 56963  | 56963  | 81858  |
| 9580   | 9580   | 8694   |
| 27443  | 27443  | 3297   |
| 1961   | 1961   | 5339   |
| 9519   | 9519   | 7264   |
| 57820  | 57820  | 4061   |
| 899    | 899    | 1585   |
| 9759   | 9759   | 66004  |
| 1419   | 1419   | 6152   |
| 283297 | 283297 | 5747   |
| 144124 | 144124 | 1890   |
| 10154  | 10154  | 1120   |
| 79803  | 79803  | 23542  |
| 56903  | 56903  | 410    |
| 389058 | 389058 | 49     |
| 3221   | 3221   | 868    |
|        |        | 4345   |
|        |        | 5591   |
|        |        | 4173   |
|        |        | 6591   |
|        |        | 123803 |
|        |        | 7290   |
|        |        | 1814   |
|        |        | 4685   |
|        |        | 3053   |
|        |        | 1739   |
|        |        | 8940   |
|        |        | 9576   |
|        |        | 7037   |
|        |        | 7707   |
|        |        | 2932   |
|        |        | 3081   |
|        |        | 1181   |
|        |        | 1962   |
|        |        | 1525   |
|        |        | 197    |
|        |        | 9370   |
|        |        | 6091   |
|        |        | 5648   |
|        |        | 351    |
|        |        | 9510   |
|        |        | 11096  |
|        |        | 2114   |
|        |        | 942    |
|        |        | 54014  |
|        |        | 2897   |
|        |        | 1827   |
|        |        | 861    |

3454  
3588  
8867  
6647  
3906  
55740  
7480  
7471  
50846  
359  
4891  
6334  
3164  
8435  
269  
7786  
2169  
1026  
6555  
10563  
25819  
682  
2038  
6447  
8645  
920  
9210  
43  
1746  
4776  
23761  
1951  
50508  
5071  
3482  
4012  
10846  
7058  
6304  
2030  
3326  
60482  
7422  
5429  
53405  
799  
10695  
23304  
5292  
7032  
7033  
9619  
7031  
875  
10270  
7498  
57448  
51232  
1545  
57045  
3973  
8912  
5170  
21  
6519  
2034  
23162  
718  
150483  
8312  
1843  
2918  
4298  
1208  
6935

6654  
116  
56853  
6093  
57534  
1837  
1000  
1302  
64374  
274  
5624  
1460  
7917  
4050  
7124  
4049  
361  
4864  
80762  
2908  
8841  
1729  
2550  
1839  
5459  
6690  
3295  
4089  
2774  
1149  
10939  
4015  
5771  
4152  
4087  
27164  
2235  
4001  
6558  
972  
6949  
5159  
1436  
2776  
9356  
7356  
80829  
5125  
1642  
9066  
117531  
7763  
355  
3988  
3717  
6199  
3508  
57010  
156  
9986  
320  
9060  
80198  
51083  
30008  
8061  
4041  
6595  
7436  
5970  
4054  
57410  
4221  
572  
5331

7423  
83706  
2011  
27250  
57678  
6975  
3087  
5950  
10935  
51196  
3070  
10580  
118788  
4601  
4128  
4481  
190  
2710  
1308  
2674  
5408  
6571  
646  
2642  
396  
2194  
3257  
1244  
1147  
6319  
27343  
2253  
8861  
5309  
51684  
3073  
585  
8994  
27301  
2317  
6303  
5795  
57338  
3696  
6671  
7337  
27342  
3679  
4327  
1017  
25794  
4665  
2735  
1649  
9050  
81490  
57104  
977  
1121  
2990  
2259  
84733  
2548  
4884  
64506  
5420  
571  
3251  
240  
9672  
3030  
3569  
22824  
8128  
1230



3688  
8829  
5154  
4092  
834  
6622  
6101  
9821  
4603  
23678  
7021  
2138  
51110  
1385  
8609  
8828  
30061  
33  
29851  
1493  
57679  
841  
1281  
2073  
6549  
389015  
51455  
2660  
6772  
11320  
3631  
1261  
7535  
55997  
667  
1310  
1297  
3267  
6556  
3579  
3488  
7520  
2335  
1674  
3357  
2043  
251  
5270  
1146  
5133  
3635  
2055  
8792  
5066  
2863  
5996  
5997  
79577  
3075  
7247  
29842  
6344  
55240  
8685  
5788  
2494  
779  
83593  
127833  
51094  
4656  
493  
89884  
3915  
3918

6045  
142  
7159  
2271  
6708  
325  
57216  
55811  
9095  
2153  
6403  
6402  
6401  
22920  
5396  
460  
27  
6646  
7827  
7399  
2104  
1380  
5362  
79723  
64421  
2213  
22926  
4921  
8490  
4009  
7292  
9588  
462  
8027  
8029  
7431  
256297  
648  
2516  
8516  
3559  
2572  
56751  
7248  
2022  
8328  
1056  
4929  
9595  
90  
25  
1861  
3309  
2934  
26468  
57282  
55342  
51162  
4851  
8022  
7186  
20  
4703  
2902  
29882  
5937  
3694  
7849  
64844  
3557  
26525  
3676  
8604  
8647  
4036

3685  
1386  
6670  
3655  
2488  
9990  
7189  
5080  
2001  
6557  
2200  
9479  
4192  
392  
2147  
4038  
197131  
6616  
8195  
182  
7301  
5020  
8455  
54567  
6614  
23627  
9962  
5111  
10125  
161742  
3067  
9101  
4118  
10018  
150465  
5173  
4821  
1471  
1789  
6640  
1869  
8480  
5105  
2778  
1908  
5770  
4773  
57167  
1875  
760  
4923  
434  
10544  
10893  
84343  
5933  
2691  
6714  
6498  
5290  
55669  
8202  
8087  
6514  
132612  
3558  
23657  
10631  
29970  
151742  
4093  
25937  
5217  
27230  
4311

26191  
4893  
4803  
845  
6913  
4853  
6814  
284612  
4881  
10456  
1141  
103  
7412  
1301  
63973  
7097  
6423  
2243  
9227  
4887  
2983  
1950  
56034  
2743  
5308  
27123  
1944  
8751  
1163  
2629  
28956  
4000  
64218  
4914  
55294  
1513  
51778  
2152  
11189  
6097  
4547  
5530  
4790  
6121  
58511  
7377  
8915  
23576  
3491  
431707  
444  
94241  
1015  
793  
4683  
245972  
1581  
9457  
2569  
6885  
1081  
7111  
7507  
1306  
8013  
27130  
259  
7357  
3301  
2683  
2218  
573  
6887  
55151  
5887

364  
360  
1271  
27240  
7094  
57704  
4882  
8434  
10020  
11168  
6194  
4300  
8613  
1600  
3716  
6536  
1996  
1031  
27329  
10630  
7133  
943  
6342  
7804  
9132  
4904  
6513  
5538  
2048  
55629  
8643  
7389  
5052  
55624  
127343  
6886  
5081  
3339  
249  
2170  
10512  
3208  
10657  
3065  
3925  
23154  
84676  
27285  
6548  
3082  
10163  
284654  
2268  
4520  
3633  
842  
8514  
7516  
83715  
10277  
6522  
3604  
54206  
1020  
4846  
9563  
4524  
375611  
9927  
7161  
6497  
984  
1855  
952  
4043

3064  
54729  
1400  
2121  
2355  
2976  
6443  
10891  
886  
152831  
55584  
7006  
7345  
5156  
10874  
2798  
6783  
2672  
676  
258  
6696  
4299  
5593  
4842  
5196  
2069  
374  
2919  
950  
2054  
56616  
65082  
488  
5027  
5025  
5158  
11113  
11200  
5319  
35  
340260  
26136  
6927  
93986  
60  
7374  
27102  
3651  
1045  
2321  
1278  
3984  
2006  
8976  
6561  
1523  
5078  
2056  
51412  
7036  
1749  
2617  
117  
9429  
28959  
10457  
4852  
5764  
3198  
1180  
835  
55503  
2051  
4085  
27306

307  
7039  
119  
27302  
27086  
60675  
10752  
5361  
7476  
7508  
6533  
285362  
3708  
8553  
11274  
5979  
23129  
3902  
26253  
79602  
2120  
4040  
4256  
5800  
10060  
3845  
3709  
491  
10533  
6010  
939  
4055  
7132  
928  
2288  
5858  
7593  
10998  
1158  
2068  
7408  
4948  
8048  
11136  
56301  
57084  
120237  
321  
641  
8826  
55897  
5346  
7026  
4205  
1075  
7305  
6261  
4240  
176  
54843  
2184  
796  
5140  
26470  
5531  
11151  
1201  
930  
487  
25970  
27040  
84649  
3566  
4647  
343

27122  
3684  
10894  
133  
2521  
5652  
84148  
587  
3683  
368  
10083  
6001  
9531  
2263  
11101  
6338  
3263  
887  
7783  
4942  
7369  
1488  
7390  
6786  
8573  
7275  
2248  
8772  
54440  
2000  
680  
959  
2158  
778  
11040  
2623  
7454  
5009  
6103  
2334  
9843  
4983  
1947  
3476  
546  
94121  
27035  
695  
1287  
1641  
3598  
6247  
10149  
54413  
3561  
6197  
1046  
2316  
22  
4534  
50814  
633  
215  
5277  
554  
3897  
3654  
4204  
2539  
1736  
5354  
2155  
496  
2621  
285



155  
1978  
10673  
1282  
7424  
175  
5423  
3551  
5327  
10947  
7994  
286  
137964  
6422  
55714  
2260  
6770  
7486  
427  
29883  
3248  
1909  
4306  
3660  
836  
291  
27295  
2160  
869  
85407  
6299  
5934  
9451  
4086  
5458  
7350  
3600  
2549  
3240  
4313  
2775  
583  
4504  
4502  
4489  
6559  
79041  
3718  
5296  
5864  
3294  
53630  
1639  
5241  
1003  
865  
3291  
4775  
23659  
55512  
8898  
4361  
9564  
16  
168667  
57057  
183  
8443  
54583  
83700  
6768  
334  
7070  
6309  
2113

5962  
5450  
5805  
23705  
335  
23621  
916  
1111  
2542  
10525  
54538  
7297  
3609  
653  
6597  
10681  
3949  
5873  
4643  
6938  
302  
6095  
22801  
54982  
1813  
6785  
3359  
1588  
5780  
1381  
10002  
3658  
79661  
1136  
1544  
1445  
1543  
64843  
1583  
2941  
5923  
7545  
5359  
4088  
8554  
545  
10491  
7048  
8320  
5948  
4690  
993  
5743  
5745  
6997  
4057  
4292  
6331  
3921  
6259  
7018  
27031  
2771  
27032  
4486  
8927  
4485  
9807  
201163  
10892  
4005  
4188  
353500  
3636  
1128

242  
2175  
287  
7220  
10257  
7368  
5310  
5029  
5897  
51167  
1464  
2492  
2280  
3623  
4772  
4008  
30813  
1473  
7075  
8941  
27148  
7148  
6416  
2342  
57105  
3425  
4646  
4692  
2562  
150  
10451  
2016  
1960  
6697  
9401  
2831  
8291  
538  
8707  
2266  
133522  
55486  
7428  
5534  
2891  
59350  
23047  
2177  
7409  
8460  
6427  
5276  
642658  
896  
472  
2302  
1836  
5336  
867  
10920  
2989  
51804  
5311  
23551  
6643  
2637  
10052  
5783  
4644  
50515  
4552  
25976  
773  
3674  
4760

51548  
25806  
2767  
1733  
92579  
23025  
23426  
2779  
6915  
6620  
23396  
1718  
1050  
85300  
85474  
3274  
3356  
1803  
51341  
5605  
10716  
112399  
394  
4286  
4825  
1143  
3931  
9468  
268  
170302  
153  
6445  
4919  
64332  
5367  
6347  
84446  
6751  
3169  
7137  
29123  
339855  
200931  
10347  
116444  
84634  
59  
7291  
415116  
3423  
5074  
64781  
374462  
4618  
10164  
7915  
170825  
328  
3567  
6550  
4223  
4249  
25928  
3006  
6096  
116369  
3010  
50640  
1647  
4886  
4060  
1997  
84433  
163175  
5348

2246  
2529  
3117  
8092  
1186  
8086  
1540  
92737  
220202  
23566  
6477  
55283  
4091  
712  
56302  
57217  
9131  
23028  
84107  
5371  
23371  
3098  
6760  
341640  
3170  
5075  
3625  
6609  
4613  
57822  
5551  
10252  
6853  
2247  
58495  
10460  
9421  
5051  
5167  
1487  
9699  
56923  
3383  
5054  
7425  
7287  
80025  
8431  
4830  
5010  
5584  
3108  
151449  
1028  
7007  
975  
5732  
140679  
4143  
1495  
7052  
1363  
1959  
2532  
140885  
55024  
949  
1236  
63974  
5914  
65057  
5620  
8651  
1440  
4976

50937  
814  
639  
9474  
9350  
9464  
3972  
3209  
3205  
50848  
3270  
57107  
3202  
4761  
8200  
124641  
28962  
5174  
23314  
23054  
6237  
10628  
2295  
148738  
94234  
9896  
1958  
84727  
30837  
9900  
3720  
23632  
5999  
9139  
4159  
6716  
9820  
80320  
1591  
5350  
4779  
1902  
51750  
3214  
5090  
50944  
83854  
83401  
5774  
4010  
57154  
2650  
8660  
84687  
63915  
7099  
55617  
11255  
26039  
2020  
3680  
6874  
25861  
860  
57620  
5428  
3516  
6017  
132  
3606  
6839  
7042  
10585  
128178  
1816

3142  
55686  
7466  
51450  
4902  
9420  
50943  
5205  
4684  
10231  
10273  
57580  
3753  
6257  
9992  
64968  
10215  
2889  
2861  
10370  
5293  
5734  
5332  
1605  
3092  
2781  
9113  
8100  
7166  
10804  
701  
90427  
4693  
340784  
9653  
7057  
60468  
23462  
1511  
5828  
643866  
149041  
5875  
57497  
1132  
64240  
53616  
23746  
30012  
4901  
8567  
10930  
7903  
54756  
3737  
10848  
7462  
4624  
23013  
64806  
23432  
147912  
23198  
8788  
2077  
1235  
10560  
9138  
91768  
2894  
4681  
8243  
675  
374768  
1140

55636  
5313  
3758  
6665  
1080  
6645  
84504  
3624  
482  
623  
3358  
23405  
5295  
93589  
2835  
3394  
7379  
5949  
6660  
5104  
26232  
2331  
1406  
4155  
4878  
5095  
22999  
3375  
3759  
85416  
3814  
117065  
55243  
7174  
2645  
5791  
9815  
1745  
375790  
5318  
32  
411  
1352  
4067  
3670  
2986  
3672  
80270  
57591  
89781  
53347  
9641  
2707  
58512  
468  
5649  
56913  
5244  
9988  
6311  
6464  
8398  
3710  
51168  
5506  
3397  
282679  
2877  
2294  
89857  
3175  
162514  
7142  
27185  
11346



3090  
4014  
10269  
26019  
3763  
3235  
57165  
4314  
5781  
63951  
5314  
6881  
2300  
9294  
7158  
2018  
5813  
4247  
4889  
256933  
150677  
382  
2308  
362  
159296  
1268  
1029  
130507  
2828  
1823  
57007  
9444  
2301  
5626  
200879  
3766  
285489  
7538  
6461  
5581  
2834  
1901  
1756  
6658  
124590  
3638  
152  
23090  
7852  
3060  
128408  
5455  
3861  
4158  
2720  
1129  
6943  
154  
10409  
148  
3621  
5406  
1131  
79733  
5329  
23230  
2706  
5947  
367  
1459  
5602  
3159  
2303  
3848  
6310

4835  
10194  
23562  
391723  
5742  
4160  
2810  
11041  
10243  
1755  
389692  
9971  
83983  
2705  
2299  
9097  
134701  
3738  
3736  
378807  
58158  
341567  
953  
10655  
5540  
5457  
2149  
130497  
2736  
4487  
627  
8204  
4808  
3481  
9241  
5744  
8851  
4762  
1946  
80243  
1231  
4908  
185  
2526  
343035  
3856  
27125  
3351  
8326  
161882  
2915  
26503  
84876  
579  
3981  
9514  
4321  
11277  
8322  
1392  
2703  
55343  
3014  
8852  
3167  
2847  
55366  
2833  
2701  
1826  
2296  
253260  
3958  
3236  
133396

668  
57817  
147  
128674  
9794  
4322  
84203  
2811  
8673  
2812  
6755  
2697  
5578  
84694  
2693  
23236  
392255  
775  
6495  
5326  
133060  
3008  
10678  
7273  
57555  
4232  
55553  
340419  
846  
54900  
92  
168620  
658  
1053  
2042  
5087  
8139  
3007  
1740  
6868  
65217  
5908  
3725  
4131  
4781  
3726  
3913  
5592  
2619  
3269  
9899  
926  
9024  
9021  
219409  
79582  
2242  
602  
57716  
6815  
199699  
216  
6547  
122042  
59283  
1432  
7038  
55818  
54536  
9388  
56955  
4097  
3340  
2074  
6502

2261  
4440  
3977  
6875  
3783  
390259  
388  
4194  
148867  
166  
6452  
4255  
6546  
8471  
3148  
81  
26033  
174  
1272  
2033  
2558  
406  
10365  
3458  
54738  
4915  
7145  
6530  
4745  
4094  
7957  
11005  
2719  
2690  
225  
10369  
8864  
3667  
64127  
2898  
5238  
5321  
4619  
6439  
6586  
360163  
1123  
221937  
1051  
4359  
1830  
3218  
5456  
83943  
6494  
23210  
4622  
4869  
2702  
2931  
6328  
51166  
4593  
596  
56848  
5251  
1876  
1889  
84062  
388552  
3953  
578  
783  
201294  
23544

7392  
9700  
3853  
1717  
9365  
151  
2019  
26257  
112398  
286826  
5008  
7067  
1305  
3426  
375616  
5741  
4916  
3952  
27023  
10999  
84525  
1896  
6563  
2395  
3032  
5340  
2212  
7157  
10203  
8224  
54768  
8633  
2885  
4885  
121340  
593  
1630  
4237  
2272  
7376  
55330  
3020  
567  
2950  
580  
84675  
8671  
29760  
5896  
93  
7227  
7546  
3852  
23607  
2131  
4632  
84941  
2764  
57159  
10743  
2066  
222662  
10933  
5819  
2064  
6862  
9381  
192668  
1269  
859  
6493  
34  
4507  
6775  
3791

3084  
10983  
1496  
5595  
23095  
3778  
7461  
9253  
3939  
5594  
56603  
8528  
23224  
6664  
23418  
54205  
4982  
7840  
2876  
1108  
22871  
1390  
2649  
4337  
51738  
151306  
64399  
6323  
6414  
5229  
149461  
1317  
57053  
3146  
6041  
1032  
8440  
100128076  
9184  
3303  
3304  
1903  
8831  
7547  
6939  
186  
3642  
3956  
3560  
1059  
344022  
27429  
1796  
50506  
70  
57369  
966  
2318  
1408  
5803  
84059  
7025  
4069  
288  
4774  
4082  
3040  
196264  
595  
3681  
7221  
57030  
4330  
5972  
864

8527  
2571  
2304  
6294  
10728  
3727  
7072  
2895  
1838  
5729  
11016  
1052  
6094  
2785  
1439  
5478  
5413  
7846  
29986  
51651  
1027  
474  
1687  
64067  
721  
3119  
6508  
54361  
1030  
3590  
7274  
390226  
4975  
4157  
8926  
4909  
23521  
597  
634  
27202  
4184  
632  
9935  
6657  
3798  
2307  
50616  
1457  
7056  
7334  
26585  
941  
2309  
6325  
55137  
3543  
1387  
3212  
10587  
1735  
63968  
6659  
10971  
4340  
3514  
3507
